# Supplementary material for: Phylogenomics of Rhodobacteraceae reveals evolutionary adaptation to marine and non-marine habitats
Source: PubMed Central journal article supplement — ISME J. 2017 Jan 20;11(6):1483–99. doi: 10.1038/ismej.2016.198 (PMC5437341; doi:10.1038/ismej.2016.198), 2017-01-20

# Phylogenomics of Rhodobacteraceae Reveals Evolutionary Adaptation to Marine and Non-Marine Habitats

Meinhard Simon, Carmen Scheuner, Jan P. Meier-Kolthoff, Thorsten Brinkhoff, Irene Wagner-Döbler, Marcus Ulbrich, Hans-Peter Klenk, Dietmar Schomburg, Jörn Petersen, Markus Göker

## Supplementary file 3

### A. Detailed description of the habitat assignment (marine or saline vs. non-marine) based on the isolation sources

The habitat assignment was conducted based on the information on the isolation source (see Supplementary File 1). The reliability of these assignments was assessed by comparing the inferred habitat with the reported NaCl requirements, if any. Growth on NaCl was reported in the literature on almost all type strains included in our sampling (they comprise roughly 50% of all strains investigated). Additionally, 16S rRNA gene sequences of all 106 strains were queried with blastn against the EMBL environmental database *em\_geo\_rel\_env*, which contains geographic locations (Lopez et al. 2014). Only hits with a sequence identity of  $\geq 99\%$  were kept. The resulting hits for each query strain, if any, were subsequently plotted on a world map with the R package *ggmap* (Kahle and Wickham 2013).

Marine and saline habitats were distinguished from non-marine habitats. A marine/saline habitat was assigned when the strain was isolated from a marine source or a source with a salt concentration comparable to the marine environment. Marine isolation sources were mainly water samples, but also biofilms, sea ice, sediment or other organisms (e.g. algae, dinoflagellates, sponges, clams). Examples for habitats equivalent to the marine one include *Nesiotobacter exalbescens* DSM 16456<sup>T</sup>, which was collected from water of a hypersaline lake on the uninhabited Laysan Atoll in the Northwestern Hawaiian Islands (Donachie et al. 2006), and *Sediminimonas qiaohouensis* DSM 21189<sup>T</sup>, which was collected from an ancient salt sediment at the Qiaohou salt mine in Yunnan, south-west China (Wang et al. 2009). Both strains require NaCl for optimal growth (Donachie et al. 2006; Wang et al. 2009). Similar results were reported for *Ruegeria lacuscaerulensis* ITI-1157<sup>T</sup>, which was isolated from a silica-rich geothermal lake, the Blue Lagoon in Iceland (Petursdottir and Kristjansson 1997). Although it was not isolated from a marine habitat, this strain does not grow without NaCl, and the optimal salinity for its growth is 3.5% - 4% NaCl (Petursdottir and Kristjansson 1997). *Maritimibacter* sp. HL-12 and *Oceanicola* sp. HL-35 were isolated from a microbial mat of Hot Lake, Washington (Lindemann et al. 2013). Hot Lake is a heliothermal hypersaline lake subject to great variation in salinity over the annual cycle. However, the salinity is dominated by magnesium sulfate rather than sodium chloride (Lindemann et al. 2013). The prevailing mixolimnion salinity at collection was 117.9 g/L for HL-12 and 134.7 g/L for HL-35 [S. Lindemann, personal communication].

Strains with non-marine habitats originated mainly from soil and compost samples. Strains for which the natural habitat was unknown were considered regarding their salt requirements. For example, *Ketogulonicigenium vulgare* WSH-001 and *Ketogulonicigenium vulgare* Y25 are industrial strains which can produce 2-keto-L-gulonic acid from L-sorbose, a key intermediate in the synthesis of vitamin C. The natural habitat of these two strains could not be traced back. However, other strains of the genus *Ketogulonicigenium* were isolated from soil samples and are reported to grow optimally without NaCl (Urbance et al. 2001). Similarly, the natural habitat of *Rubellimicrobium thermophilum* DSM 16684<sup>T</sup>, which was isolated from coloured deposits (biofilm) in a pulp dryer in Finland (Denner et al. 2006), is unknown so far (Fiebig et al. 2013). However, other *Rubellimicrobium* species are reported to have low salt tolerance, that is, < 1% NaCl (Weon et al. 2009). Another strain with unknown origin is *Rhodobacter sphaeroides* 2.4.1<sup>T</sup>, for which an optimal growth is reported in the absence of NaCl (Arunasri et al. 2008; Ramana et al. 2008).

The strains *Rhodobacter sphaeroides* ATCC 17025 and *Rhodobacter sphaeroides* ATCC 17029 were already isolated by C. van Niel. Neither their source of isolation (Choudhary et al. 2007) nor their salt requirements could be identified. However, since optimal growth was reported in the absence of NaCl for the type strain (see above), these strains probably also prefer low salt concentration.

The comparison of the inferred habitat assignments with the reported NaCl requirements uniformly confirms the assignments, as all marine/saline strains which have been tested on NaCl show either a dependency on NaCl or at least an optimum that is close to fully marine (3%) or brackish (1%) salt concentrations, and vice versa. Likewise, the BLAST search against the *em\_geo\_rel\_env* database (see the appendix at the end of this document) either yielded no hits at all (and thus no reason to presume the respective strain occurs in other habitats than the one it had been isolated from) or hits that corresponded to the inferred habitat. In some cases hits of a marine organism to a non-marine environment were reported but closer examination revealed those as saline. For example, the hit of *Loktanella vestfoldensis* DSM 16212<sup>T</sup> was located in a polysaline lake in central China. The marine query *Roseovarius* sp. TM1035 hit the Spanish Tabla de Daimiel National Park, a wetland on the La Mancha plain. Here, two rivers – salt water and fresh water – cause recurrent seasonal inundations of the area, thus explaining the high similarity to a marine organism.

Whereas its isolation source needs not in general correspond to the preferred habitat of a strain, these comparisons indicate that, when simplified to just two options, the habitat assignments found in the literature on roseobacters are highly reliable. This conclusion is reinforced by the results from our phylogenetic analyses, which indicate that the habitat is phylogenetically conserved (see the main text and below).

## B. Results of the maximum likelihood (ML) and maximum-parsimony (MP) analyses for the different supermatrices described in the text

General characteristics of the character matrices constructed with all strains included and the included and trees inferred from them. The score is the log likelihood for the ML analyses, the number of steps for MP analysis (not counting uninformative characters). For each matrix and inference method, two analyses were conducted, one without and one with removal of the outgroup strains. For ExaML and TNT, both normal (above) and partition bootstrapping (below) were conducted. Abbreviations used: MCG, most conserved genes; BS, bootstrap support; X, omitted for reasons of running time.

| Matrix    | # Genes | # Charac-<br>ters | Analysis Model   | Score            | Average BS       |
|-----------|---------|-------------------|------------------|------------------|------------------|
| 50 MCG    | 50      | 18,383            | RAxML PROTCATLGF | -600,680.35      | 82.58            |
|           |         |                   | ExaML -          | -572,682.46      | 77.82            |
|           |         |                   |                  |                  | 78.52            |
|           |         |                   | TNT -            | 99,581           | 88.99            |
|           |         |                   |                  |                  | 79.64            |
|           |         |                   | [Ingroup]        |                  | RAxML PROTCATLGF |
|           |         |                   | ExaML -          | -457,862.95      | 85.77            |
|           |         |                   |                  |                  | 79.43            |
|           |         |                   | TNT -            | 77,374           | 89.41            |
|           |         |                   |                  |                  | 81.23            |
|           |         |                   |                  |                  |                  |
|           | 100 MCG | 100               | 38,887           | RAxML PROTCATLGF | -1,469,712.63    |
| ExaML -   |         |                   |                  | -1,408,969.93    | 85.56            |
|           |         |                   |                  |                  | 85.03            |
| TNT -     |         |                   |                  | 253,282          | 96.42            |
|           |         |                   |                  |                  | 88.81            |
| [Ingroup] |         |                   |                  |                  | RAxML PROTCATLGF |
|           |         |                   | ExaML -          | -1,123,079.07    | 91.22            |
|           |         |                   |                  |                  | 87.30            |
|           |         |                   | TNT -            | 197,077          | 97.92            |
|           |         |                   |                  |                  | 90.94            |
|           |         |                   |                  |                  |                  |

|             |       |         |               |            |                |               |
|-------------|-------|---------|---------------|------------|----------------|---------------|
| 150 MCG     | 150   | 59,265  | RAxML         | PROTCATLGF | -2,538,255.03  | 95.39         |
|             |       |         | ExaML         | -          | -2,448,015.94  | 89.23         |
|             |       |         |               |            |                | 89.70         |
|             |       |         | TNT           | -          | 449,917        | 94.75         |
|             |       |         |               |            |                | 89.37         |
|             |       |         | [Ingroup]     | RAxML      | PROTCATLGF     | -2,037,279.55 |
|             | ExaML | -       | -1,948,280.55 | 91.72      |                |               |
|             |       |         | 88.20         |            |                |               |
|             |       |         | TNT           | -          | 351,302        | 91.80         |
|             |       |         |               |            | 89.29          |               |
| 200 MCG     | 200   | 77,986  | RAxML         | PROTCATLGF | -3,770,138.50  | 97.55         |
|             |       |         | ExaML         | -          | -3,657,857.77  | 94.22         |
|             |       |         |               |            |                | 94.04         |
|             |       |         | TNT           | -          | 687,849        | 97.17         |
|             |       |         |               |            |                | 94.61         |
|             |       |         | [Ingroup]     | RAxML      | PROTCATLGF     | -3,038,324.97 |
|             | ExaML | -       | -2,924,875.90 | 97.21      |                |               |
|             |       |         | 94.31         |            |                |               |
|             |       |         | TNT           | -          | 540,852        | 97.58         |
|             |       |         |               |            | 94.47          |               |
| Core Genes  | 208   | 80,578  | RAxML         | PROTCATLGF | -4,021,184.16  | 97.98         |
|             |       |         | ExaML         | -          | -3,906,397.28  | 96.50         |
|             |       |         |               |            |                | 93.91         |
|             |       |         | TNT           | -          | 747,377        | 97.05         |
|             |       |         |               |            |                | 94.70         |
|             |       |         | [Ingroup]     | RAxML      | PROTCATLGF     | -3,251,380.02 |
|             | ExaML | -       | -3,133,168.42 | 94.21      |                |               |
|             |       |         | 94.38         |            |                |               |
|             |       |         | TNT           | -          | 582,938        | 97.38         |
|             |       |         |               |            | 95.18          |               |
| MARE Matrix | 2,116 | 614,117 | RAxML         | PROTCATLGF | -32,085,776.20 | 99.18         |



|             |           |           |       |            |                |       |
|-------------|-----------|-----------|-------|------------|----------------|-------|
|             |           |           | ExaML | -          | -31,300,593.65 | 96.77 |
|             |           |           |       |            |                | 92.64 |
|             |           |           | TNT   | -          | 6,084,484      | 97.88 |
|             |           |           |       |            |                | 94.17 |
|             | [Ingroup] |           | RAxML | PROTCATLGF | -26,699,340.11 | 98.13 |
|             |           |           | ExaML | -          | -25,860,253.33 | X     |
|             |           |           |       |            |                | X     |
|             |           |           | TNT   | -          | 4,898,106      | 97.36 |
|             |           |           |       |            |                | 93.39 |
|             |           |           |       | PROTGAMM   |                |       |
| Full Matrix | 14,042    | 3,855,635 | RAxML | ALGF       | -86,508,642.04 | X     |
|             |           |           | ExaML | -          | -82,437,287.39 | X     |
|             |           |           |       |            |                | X     |
|             |           |           | TNT   | -          | 14,000,901     | 98.95 |
|             |           |           |       |            |                | 95.76 |
|             |           |           |       | PROTGAMM   |                |       |
|             | [Ingroup] |           | RAxML | ALGF       | -71,799,644.20 | X     |
|             |           |           | ExaML | -          | X              | X     |
|             |           |           |       |            |                | X     |
|             |           |           | TNT   | -          | 11,144,755     | 93.76 |
|             |           |           |       |            |                | 92.56 |

General characteristics of the character matrices constructed with only the ingroup strains included and trees inferred from them. The score is the log likelihood for the ML analyses, the number of steps for MP analysis (not counting uninformative characters). For ExaML and TNT, both normal (above) and partition bootstrapping (below) were conducted. Abbreviations used: MCG, most conserved genes; BS, bootstrap support; X, omitted for reasons of running time.

| Matrix | # Genes | # Characters | Analysis Model   | Score       | Average BS |
|--------|---------|--------------|------------------|-------------|------------|
| 50 MCG | 50      | 17,293       | RAxML PROTCATLGF | -408,140.96 | 92.67      |
|        |         |              | ExaML -          | -384,965.07 | 81.04      |
|        |         |              |                  |             | 80.79      |

|             |      |         |       |            |                |       |
|-------------|------|---------|-------|------------|----------------|-------|
|             |      |         | TNT   | -          | 64,353         | 89.78 |
|             |      |         |       |            |                | 80.94 |
| 100 MCG     | 100  | 35,891  | RAxML | PROTCATLGF | -976,238.27    | 91.77 |
|             |      |         | ExaML | -          | -925,625.22    | 86.87 |
|             |      |         |       |            |                | 86.80 |
|             |      |         | TNT   | -          | 158,333        | 97.26 |
|             |      |         |       |            |                | 87.70 |
| 150 MCG     | 150  | 55,234  | RAxML | PROTCATLGF | -1,666,802.24  | 96.93 |
|             |      |         | ExaML | -          | -1,585,188.16  | 87.87 |
|             |      |         |       |            |                | 87.80 |
|             |      |         | TNT   | -          | 278,031        | 94.62 |
|             |      |         |       |            |                | 89.17 |
| 200 MCG     | 200  | 75,696  | RAxML | PROTCATLGF | -2,544,613.25  | 98.31 |
|             |      |         | ExaML | -          | -2,429,202.17  | 91.49 |
|             |      |         |       |            |                | 92.14 |
|             |      |         | TNT   | -          | 434,745        | 98.34 |
|             |      |         |       |            |                | 91.97 |
| 250 MCG     | 250  | 94,224  | RAxML | PROTCATLGF | -3,495,301.53  | 97.02 |
|             |      |         | ExaML | -          | -3,355,092.27  | 90.68 |
|             |      |         |       |            |                | 91.03 |
|             |      |         | TNT   | -          | 611,849        | 98.37 |
|             |      |         |       |            |                | 93.47 |
| Core Genes  | 297  | 110,074 | RAxML | PROTCATLGF | -4,534,876.05  | 97.47 |
|             |      |         | ExaML | -          | -4,376,418.38  | 93.96 |
|             |      |         |       |            |                | 94.14 |
|             |      |         | TNT   | -          | 814,645        | 98.31 |
|             |      |         |       |            |                | 95.99 |
| MARE Matrix | 2106 | 597,144 | RAxML | PROTCATLGF | -26,318,037.63 | 97.44 |
|             |      |         | ExaML | -          | -25,508,730.2  | X     |
|             |      |         |       |            |                | X     |

|             |        |           |          |      |                |       |
|-------------|--------|-----------|----------|------|----------------|-------|
|             |        |           | TNT      | -    | 4,833,411      | 96.98 |
|             |        |           |          |      |                | 92.51 |
|             |        |           | PROTGAMM |      |                |       |
| Full Matrix | 12,389 | 3,383,815 | RAxML    | ALGF | -70,443,547.27 | X     |
|             |        |           | ExaML    | -    | -66,869,731.93 | X     |
|             |        |           |          |      |                | X     |
|             |        |           | TNT      | -    | 11,144,755     | 94.14 |
|             |        |           |          |      |                | 92.46 |

## C. Phylogenetic analysis of alternative supermatrices with all strains

This chapter lists the trees inferred from alternative matrices with all strains but which are not shown in the main manuscript.

3. ML tree inferred from the supermatrix including the 50 most conserved genes under a single overall model of amino acid evolution and rooted with the included outgroup strains. The branches are scaled in terms of the expected number of substitutions per site. Numbers above branches (from left to right) are bootstrapping support values if larger than 60% from (i) ordinary bootstrap under ML with a single overall model of amino acid evolution; (ii) ordinary bootstrap under ML with one model per gene; (iii) partition bootstrap under ML; (iv) ordinary bootstrap under MP; (v) partition bootstrap under MP. Values larger than 95% are shown in bold; dots indicate branches with maximum support under all settings. For the groups see the caption of Fig. 1 in the main manuscript. Triangles indicate type strains. The colours of the tip labels indicate the habitat: blue, marine; brown, non-marine; uncoloured, unknown.

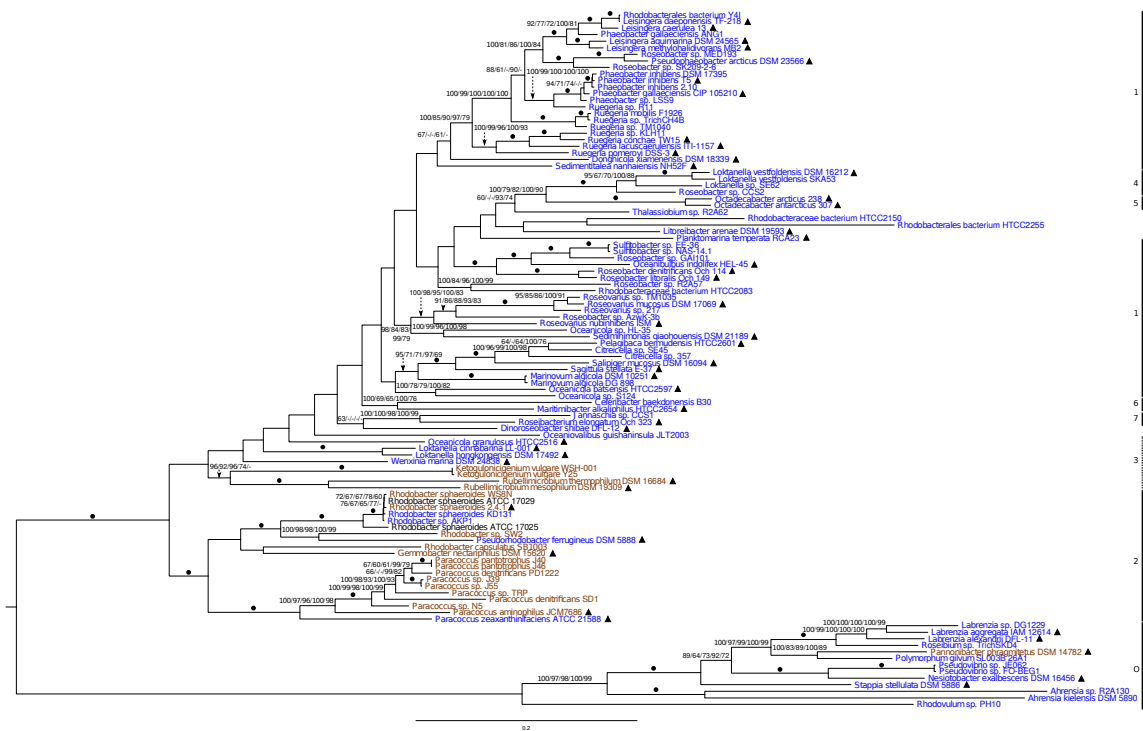

4. ML tree inferred from the supermatrix including the 100 most conserved genes under a single overall model of amino acid evolution and rooted with the included outgroup strains. The branches are scaled in terms of the expected number of substitutions per site. Numbers above branches (from left to right) are bootstrapping support values if larger than 60% from (i) ordinary bootstrap under ML with a single overall model of amino acid evolution; (ii) ordinary bootstrap under ML with one model per gene; (iii) partition bootstrap under ML; (iv) ordinary bootstrap under MP; (v) partition bootstrap under MP. Values larger than 95% are shown in bold; dots indicate branches with maximum support under all settings. For the groups see the caption of Fig. 1 in the main manuscript. Triangles indicate type strains. The colours of the tip labels indicate the habitat: blue, marine; brown, non-marine; uncoloured, unknown.

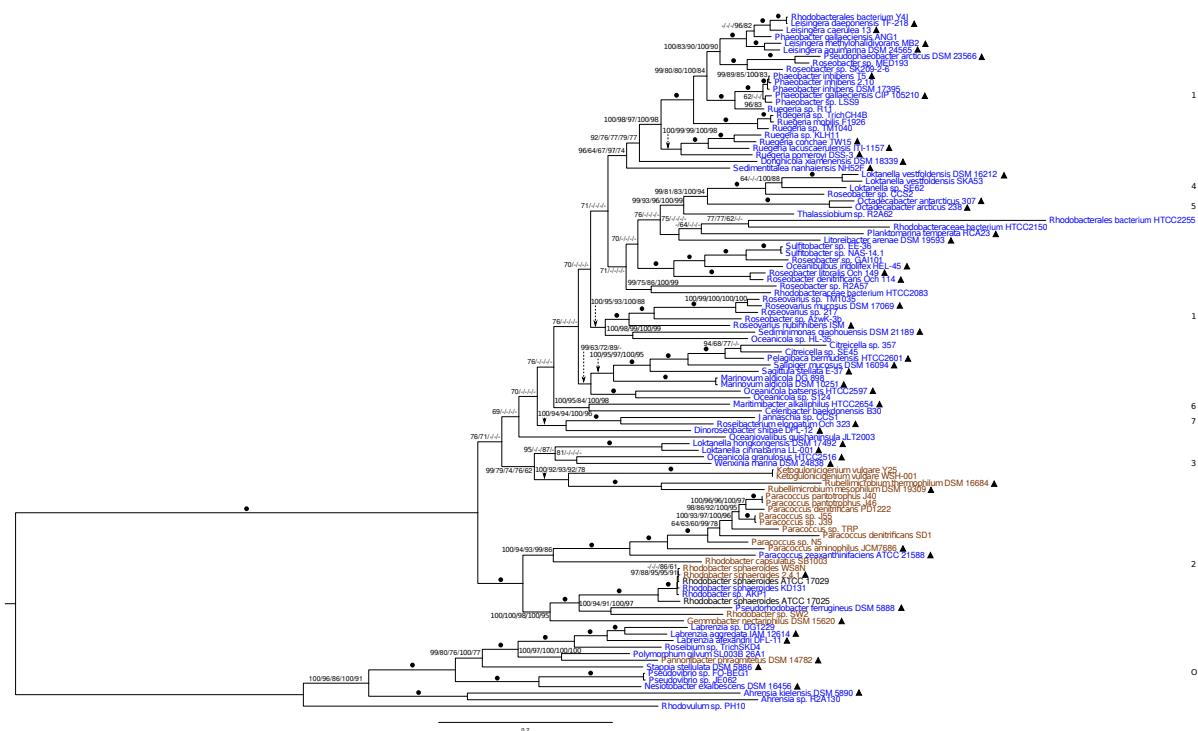

5. ML tree inferred from the supermatrix including the 150 most conserved genes under a single overall model of amino acid evolution and rooted with the included outgroup strains. The branches are scaled in terms of the expected number of substitutions per site. Numbers above branches (from left to right) are bootstrapping support values if larger than 60% from (i) ordinary bootstrap under ML with a single overall model of amino acid evolution; (ii) ordinary bootstrap under ML with one model per gene; (iii) partition bootstrap under ML; (iv) ordinary bootstrap under MP; (v) partition bootstrap under MP. Values larger than 95% are shown in bold; dots indicate branches with maximum support under all settings. For the groups see the caption of Fig. 1 in the main manuscript. Triangles indicate type strains. The colours of the tip labels indicate the habitat: blue, marine; brown, non-marine; uncoloured, unknown.

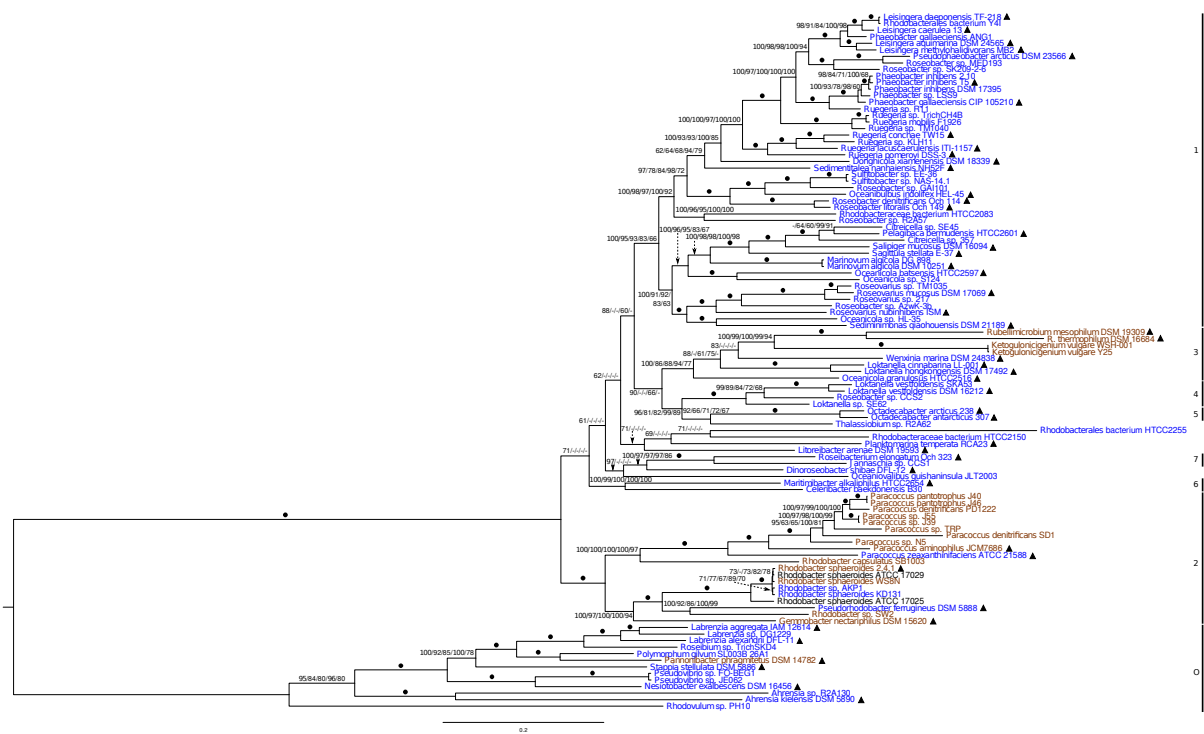

6. ML tree inferred from the supermatrix including the 200 most conserved genes under a single overall model of amino acid evolution and rooted with the included outgroup strains. The branches are scaled in terms of the expected number of substitutions per site. Numbers above branches (from left to right) are bootstrapping support values if larger than 60% from (i) ordinary bootstrap under ML with a single overall model of amino acid evolution; (ii) ordinary bootstrap under ML with one model per gene; (iii) partition bootstrap under ML; (iv) ordinary bootstrap under MP; (v) partition bootstrap under MP. Values larger than 95% are shown in bold; dots indicate branches with maximum support under all settings. For the groups see the caption of Fig. 1 in the main manuscript. Triangles indicate type strains. The colours of the tip labels indicate the habitat: blue, marine; brown, non-marine; uncoloured, unknown.

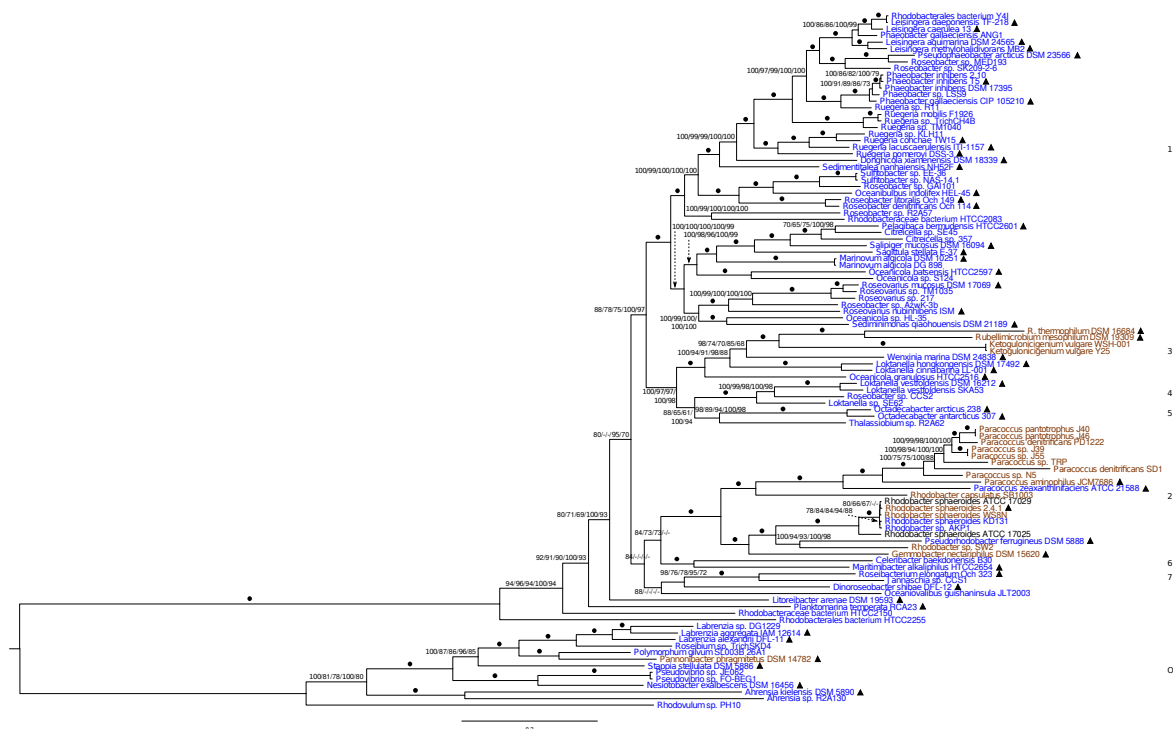

7. ML tree inferred from the core-gene matrix under a single overall model of amino acid evolution and rooted with the included outgroup strains. The branches are scaled in terms of the expected number of substitutions per site. Numbers above branches (from left to right) are bootstrapping support values if larger than 60% from (i) ordinary bootstrap under ML with a single overall model of amino acid evolution; (ii) ordinary bootstrap under ML with one model per gene; (iii) partition bootstrap under ML; (iv) ordinary bootstrap under MP; (v) partition bootstrap under MP. Values larger than 95% are shown in bold; dots indicate branches with maximum support under all settings. For the groups see the caption of Fig. 1 in the main manuscript. Triangles indicate type strains. The colours of the tip labels indicate the habitat: blue, marine; brown, non-marine; uncoloured, unknown.

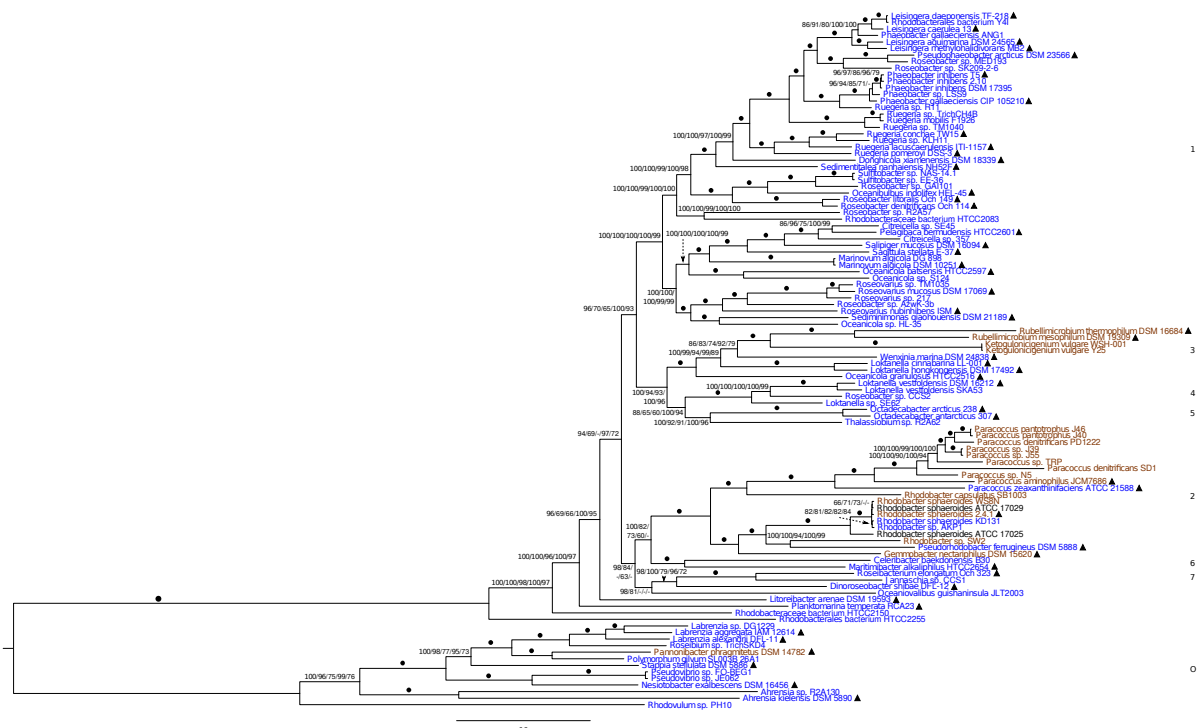



8. ML tree inferred from the MARE-filtered supermatrix under a single overall model of amino acid evolution and rooted with the included outgroup strains. The branches are scaled in terms of the expected number of substitutions per site. Numbers above branches (from left to right) are bootstrapping support values if larger than 60% from (i) ordinary bootstrap under ML with a single overall model of amino acid evolution; (ii) ordinary bootstrap under ML with one model per gene; (iii) partition bootstrap under ML; (iv) ordinary bootstrap under MP; (v) partition bootstrap under MP. Values larger than 95% are shown in bold; dots indicate branches with maximum support under all settings. For the groups see the caption of Fig. 1 in the main manuscript. Triangles indicate type strains. The colours of the tip labels indicate the habitat: blue, marine; brown, non-marine; uncoloured, unknown.

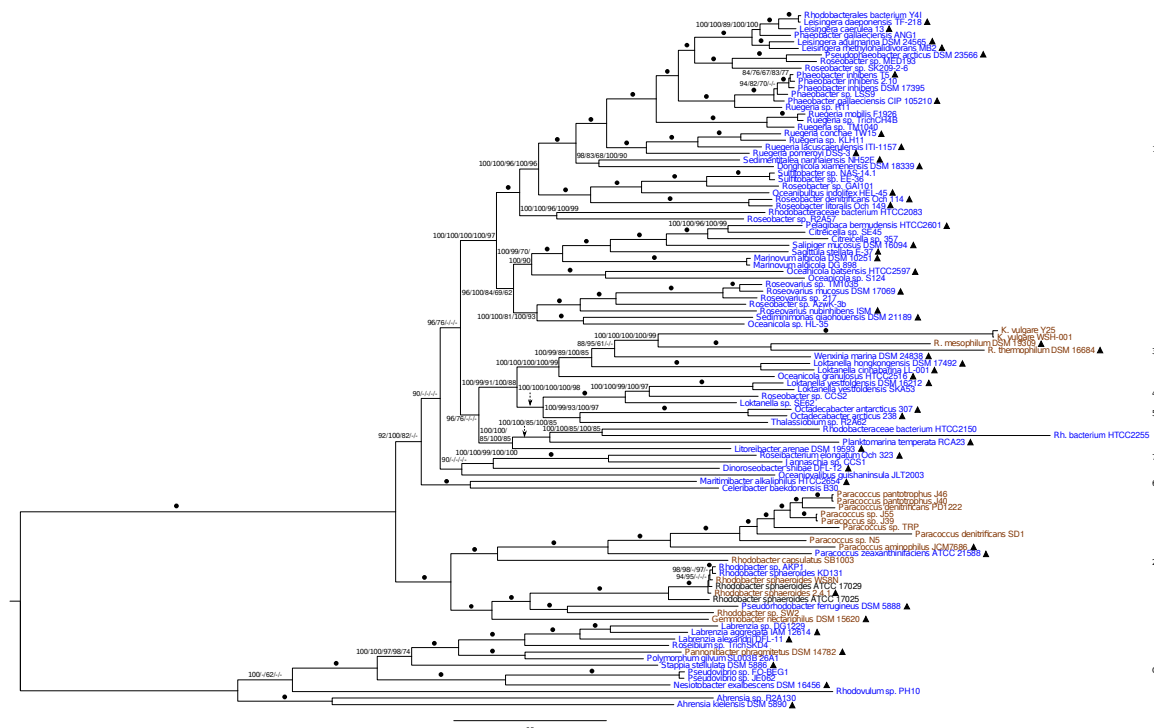

9. ML tree inferred from the “full” supermatrix under a single overall model of amino acid evolution and rooted with the included outgroup strains. The branches are scaled in terms of the expected number of substitutions per site. Numbers above branches (from left to right) are bootstrapping support values if larger than 60% from (i) ordinary bootstrap under MP; (ii) partition bootstrap under MP. Values larger than 95% are shown in bold; dots indicate branches with maximum support under all settings. For the groups see the caption of Fig. 1 in the main manuscript. Triangles indicate type strains. The colours of the tip labels indicate the habitat: blue, marine; brown, non-marine; uncoloured, unknown.

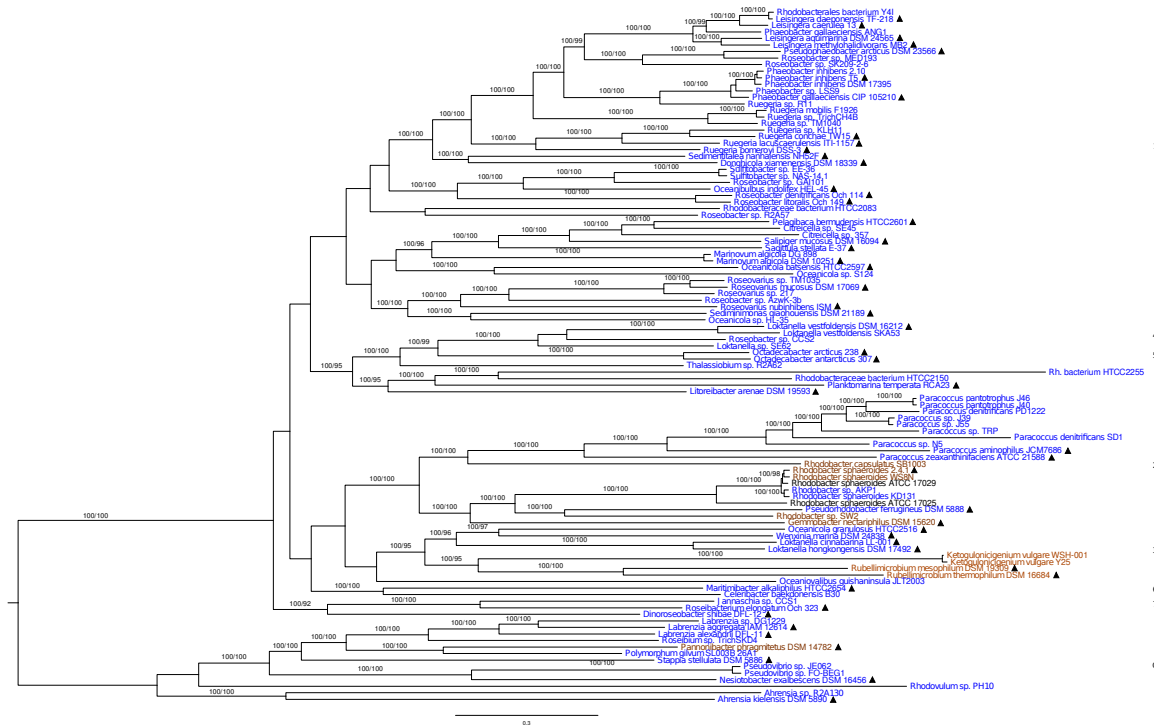

## D. Constrained analyses and paired-site tests

Results of the maximum likelihood (ML) and maximum-parsimony (MP) constraint analyses and paired-site tests for a selection of the supermatrices described in the text. (AU-test, approximately unbiased test; \*after summing up the scores per gene).

| Analysis                               | Log likelihood of the ML tree                            |                                                          | Length of the best MP tree (steps) |             | P value                                                                                                                                                                                                                                                                                        |
|----------------------------------------|----------------------------------------------------------|----------------------------------------------------------|------------------------------------|-------------|------------------------------------------------------------------------------------------------------------------------------------------------------------------------------------------------------------------------------------------------------------------------------------------------|
|                                        | unconstrained                                            | constrained                                              | unconstrained                      | constrained |                                                                                                                                                                                                                                                                                                |
| core genes<br>(roseobacter constraint) | RAxML:<br>-4,021,184.16<br><br>ExaML:<br>-4,015,298.23   | RAxML:<br>-4,021,395.94<br><br>ExaML:<br>-4,015,472.80   | 737,783                            | 738,388     | RAxML/AU-test:<br>0.029000<br><br>ExaML/Wilcox:<br>0.000000<br><br>ExaML/T-test:<br>0.062282<br><br>ExaML/Wilcox*:<br>0.148199<br><br>ExaML/T-test*:<br>0.167543<br><br>TNT/Wilcox:<br>0.000000<br><br>TNT/T-test:<br>0.000000<br><br>TNT/Wilcox*:<br>0.000031<br><br>TNT/T-test*:<br>0.000057 |
| “full”<br>(roseobacter constraint)     | RAxML:<br>-86,508,642.04<br><br>ExaML:<br>-86,232,358.08 | RAxML:<br>-86,506,978.69<br><br>ExaML:<br>-86,234,156.07 | 14,000,901                         | 14,002,523  | RAxML/AU-test:<br>0,000200<br><br>ExaML/Wilcox:<br>0.000070<br><br>ExaML/T-test:<br>0.007039<br><br>ExaML/Wilcox*:<br>0.000000                                                                                                                                                                 |

|                                        |                                                                   |                                                                   |           |           |                                                                                                                                                                                                        |
|----------------------------------------|-------------------------------------------------------------------|-------------------------------------------------------------------|-----------|-----------|--------------------------------------------------------------------------------------------------------------------------------------------------------------------------------------------------------|
|                                        |                                                                   |                                                                   |           |           | <p>ExaML/T-test*:<br/>0.293506</p> <p>TNT/Wilcox:<br/>0.000000</p> <p>TNT/T-test:<br/>0.000000</p> <p>TNT/Wilcox*:<br/>0.003236</p> <p>TNT/T-test*:<br/>0.029498</p>                                   |
| MARE-filtered (roseobacter constraint) | ML analyses (RAxML, ExaML): roseobacters already monophyletic     |                                                                   | 6,007,432 | 6,008,833 | <p>ML (RAxML, ExaML) analyses: roseobacters already monophyletic</p> <p>TNT/Wilcox:<br/>0.000000</p> <p>TNT/T-test:<br/>0.000000</p> <p>TNT/Wilcox*:<br/>0.000000</p> <p>TNT/T-test*:<br/>0.000000</p> |
| MARE-filtered (core-genes constraint)  | <p>RAxML:<br/>-32,085,776.20</p> <p>ExaML:<br/>-32,023,681.27</p> | <p>RAxML:<br/>-32,090,325.13</p> <p>ExaML:<br/>-32,025,887.74</p> | 6,007,432 | 6,008,387 | <p>RAxML/AU-test:<br/>0.000000</p> <p>ExaML/Wilcox:<br/>0.000000</p> <p>ExaML/T-test:<br/>0.000013</p> <p>ExaML/Wilcox*:<br/>0.772978</p> <p>ExaML/T-test*:<br/>0.097032</p> <p>TNT/Wilcox:</p>        |

|                                   |                                                      |                                                      |           |           |                                                                                                                                                                                                                                                             |
|-----------------------------------|------------------------------------------------------|------------------------------------------------------|-----------|-----------|-------------------------------------------------------------------------------------------------------------------------------------------------------------------------------------------------------------------------------------------------------------|
|                                   |                                                      |                                                      |           |           | 0.000173<br>TNT/T-test:<br>0.000173<br>TNT/Wilcox*:<br>0.893966<br>TNT/T-test*:<br>0.109582                                                                                                                                                                 |
| MARE-filtered (“full” constraint) | RAxML:<br>-32,085,776.20<br>ExaML:<br>-32,023,537.85 | RAxML:<br>-32,087,072.01<br>ExaML:<br>-32,025,086.16 | 6,007,432 | 6,010,002 | RAxML/AU-test:<br>8e-06<br>ExaML/Wilcox:<br>0.024465<br>ExaML/T-test:<br>0.000000<br>ExaML/Wilcox*:<br>0.000111<br>ExaML/T-test*:<br>0.042567<br>TNT/Wilcox:<br>0.000000<br>TNT/T-test:<br>0.000000<br>TNT/Wilcox*:<br>0.000000<br>TNT/T-test*:<br>0.003742 |



2. ML tree inferred from the supermatrix including the 100 most conserved genes after removal of the outgroup under a single overall model of amino acid evolution and rooted according to the LSD results. The branches are scaled in terms of the expected number of substitutions per site. Numbers above branches (from left to right) are bootstrapping support values if larger than 60% from (i) ordinary bootstrap under ML with a single overall model of amino acid evolution; (ii) ordinary bootstrap under ML with one model per gene; (iii) partition bootstrap under ML; (iv) ordinary bootstrap under MP; (v) partition bootstrap under MP. Values larger than 95% are shown in bold; dots indicate branches with maximum support under all settings. For the groups see the caption of Fig. 1 in the main manuscript. Triangles indicate type strains. The colours of the tip labels indicate the habitat: blue, marine; brown, non-marine; uncoloured, unknown.

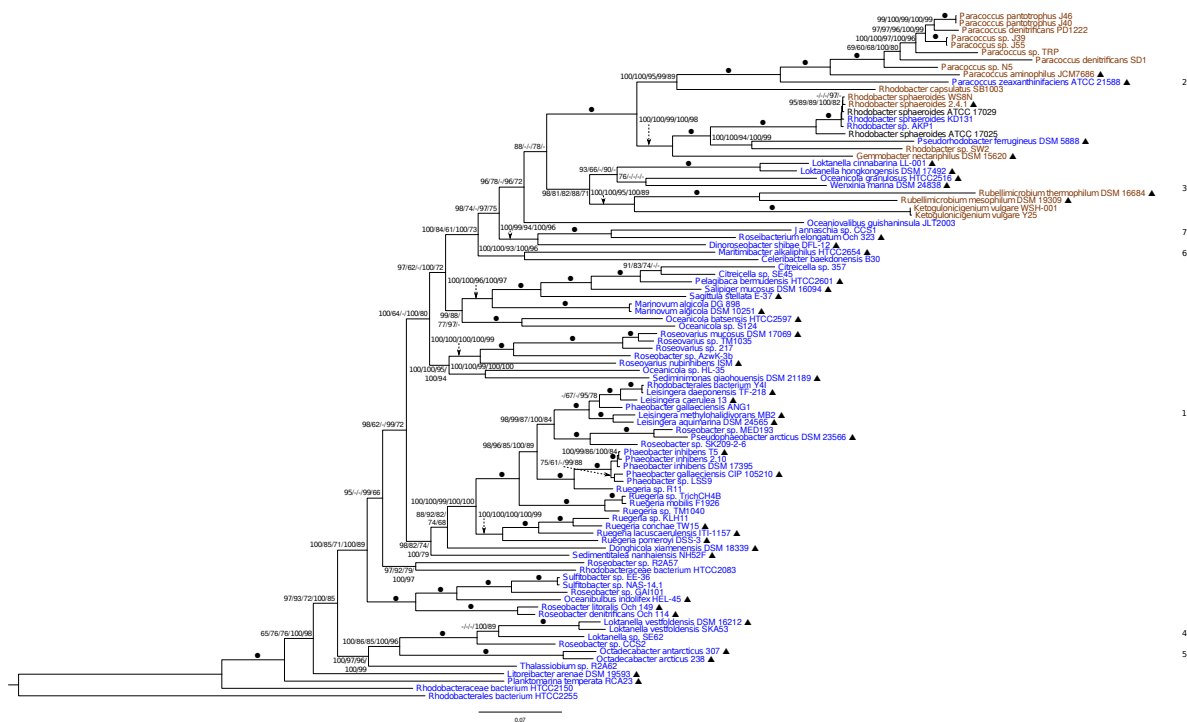

3. ML tree inferred from the supermatrix including the 150 most conserved genes after removal of the outgroup under a single overall model of amino acid evolution and rooted according to the LSD results. The branches are scaled in terms of the expected number of substitutions per site. Numbers above branches (from left to right) are bootstrapping support values if larger than 60% from (i) ordinary bootstrap under ML with a single overall model of amino acid evolution; (ii) ordinary bootstrap under ML with one model per gene; (iii) partition bootstrap under ML; (iv) ordinary bootstrap under MP; (v) partition bootstrap under MP. Values larger than 95% are shown in bold; dots indicate branches with maximum support under all settings. For the groups see the caption of Fig. 1 in the main manuscript. Triangles indicate type strains. The colours of the tip labels indicate the habitat: blue, marine; brown, non-marine; uncoloured, unknown.

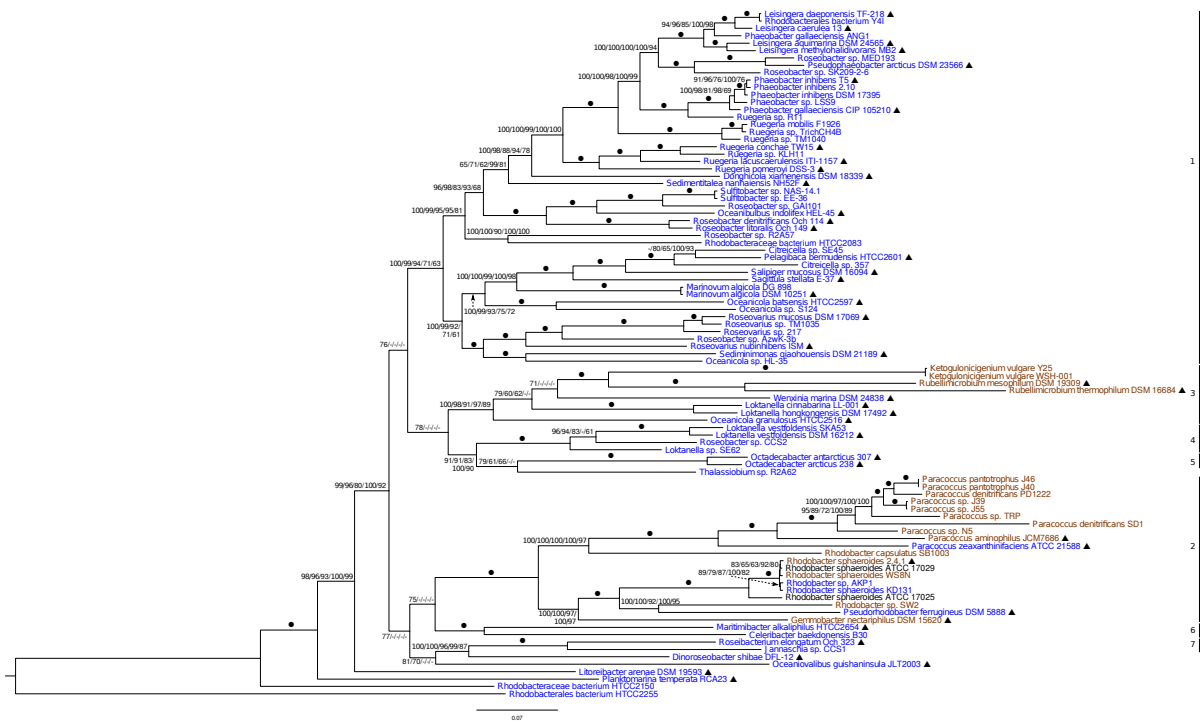



4. ML tree inferred from the supermatrix including the 200 most conserved genes after removal of the outgroup under a single overall model of amino acid evolution and rooted according to the LSD results. The branches are scaled in terms of the expected number of substitutions per site. Numbers above branches (from left to right) are bootstrapping support values if larger than 60% from (i) ordinary bootstrap under ML with a single overall model of amino acid evolution; (ii) ordinary bootstrap under ML with one model per gene; (iii) partition bootstrap under ML; (iv) ordinary bootstrap under MP; (v) partition bootstrap under MP. Values larger than 95% are shown in bold; dots indicate branches with maximum support under all settings. For the groups see the caption of Fig. 1 in the main manuscript. Triangles indicate type strains. The colours of the tip labels indicate the habitat: blue, marine; brown, non-marine; uncoloured, unknown.

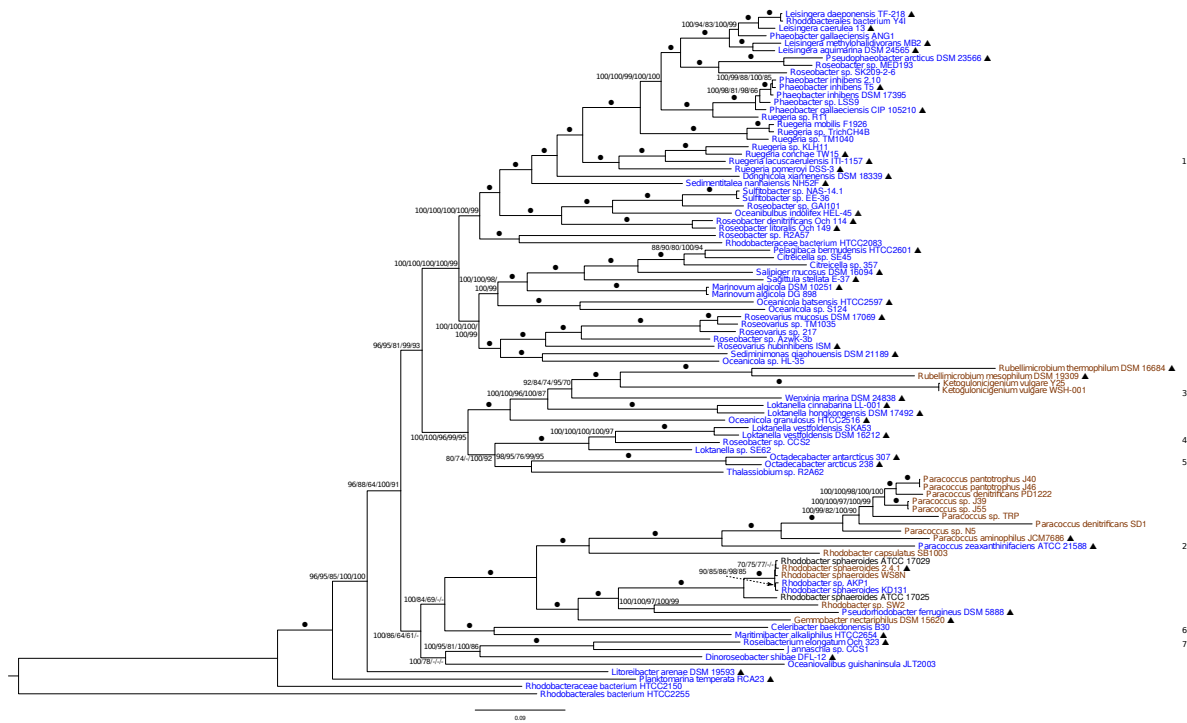

5. ML tree inferred from the core-gene matrix after removal of the outgroup under a single overall model of amino acid evolution and rooted according to the LSD results. The branches are scaled in terms of the expected number of substitutions per site. Numbers above branches (from left to right) are bootstrapping support values if larger than 60% from (i) ordinary bootstrap under ML with a single overall model of amino acid evolution; (ii) ordinary bootstrap under ML with one model per gene; (iii) partition bootstrap under ML; (iv) ordinary bootstrap under MP; (v) partition bootstrap under MP. Values larger than 95% are shown in bold; dots indicate branches with maximum support under all settings. For the groups see the caption of Fig. 1 in the main manuscript. Triangles indicate type strains. The colours of the tip labels indicate the habitat: blue, marine; brown, non-marine; uncoloured, unknown.

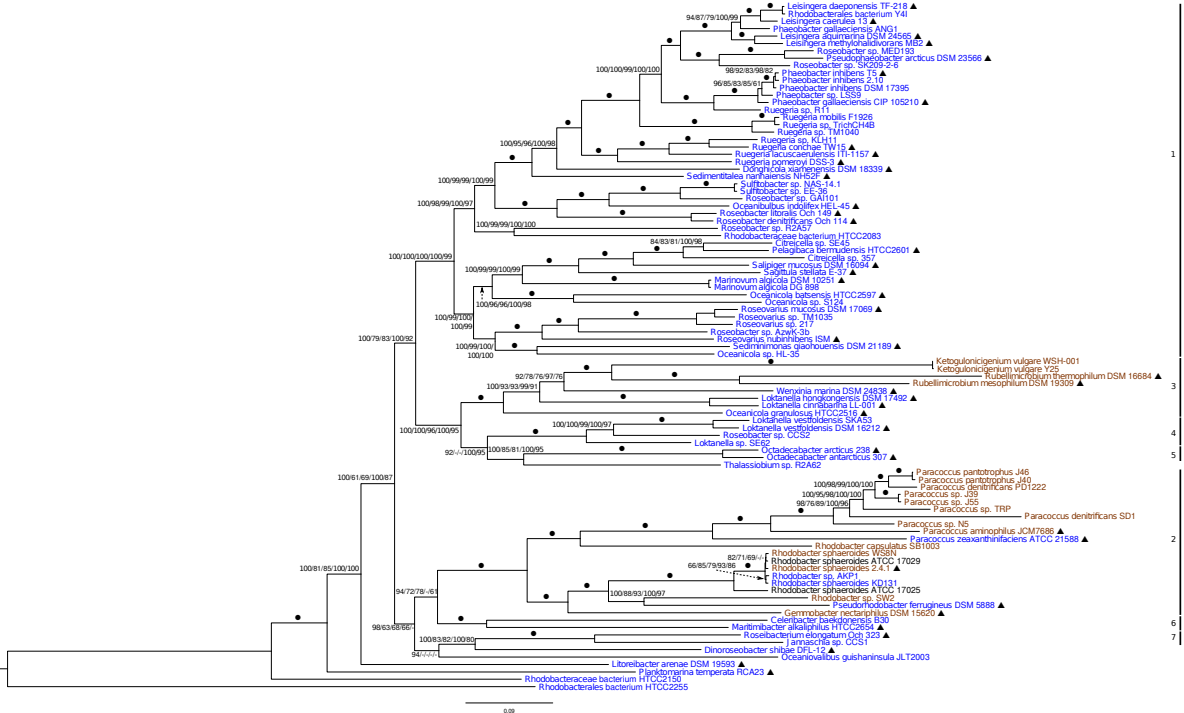

6. ML tree inferred from the MARE-filtered supermatrix after removal of the outgroup under a single overall model of amino acid evolution and rooted according to the LSD results. The branches are scaled in terms of the expected number of substitutions per site. Numbers above branches (from left to right) are bootstrapping support values if larger than 60% from (i) ordinary bootstrap under ML with a single overall model of amino acid evolution; (ii) ordinary bootstrap under ML with one model per gene; (iii) partition bootstrap under ML; (iv) ordinary bootstrap under MP; (v) partition bootstrap under MP. Values larger than 95% are shown in bold; dots indicate branches with maximum support under all settings. For the groups see the caption of Fig. 1 in the main manuscript. Triangles indicate type strains. The colours of the tip labels indicate the habitat: blue, marine; brown, non-marine; uncoloured, unknown.

[Omitted for reasons of running time.]

7. ML tree inferred from the “full” supermatrix after removal of the outgroup under a single overall model of amino acid evolution and rooted according to the LSD results. The branches are scaled in terms of the expected number of substitutions per site. Numbers above branches (from left to right) are bootstrapping support values if larger than 60% from (i) ordinary bootstrap under MP; (ii) partition bootstrap under MP. Values larger than 95% are shown in bold; dots indicate branches with maximum support under all settings. For the groups see the caption of Fig. 1 in the main manuscript. Triangles indicate type strains. The colours of the tip labels indicate the habitat: blue, marine; brown, non-marine; uncoloured, unknown.

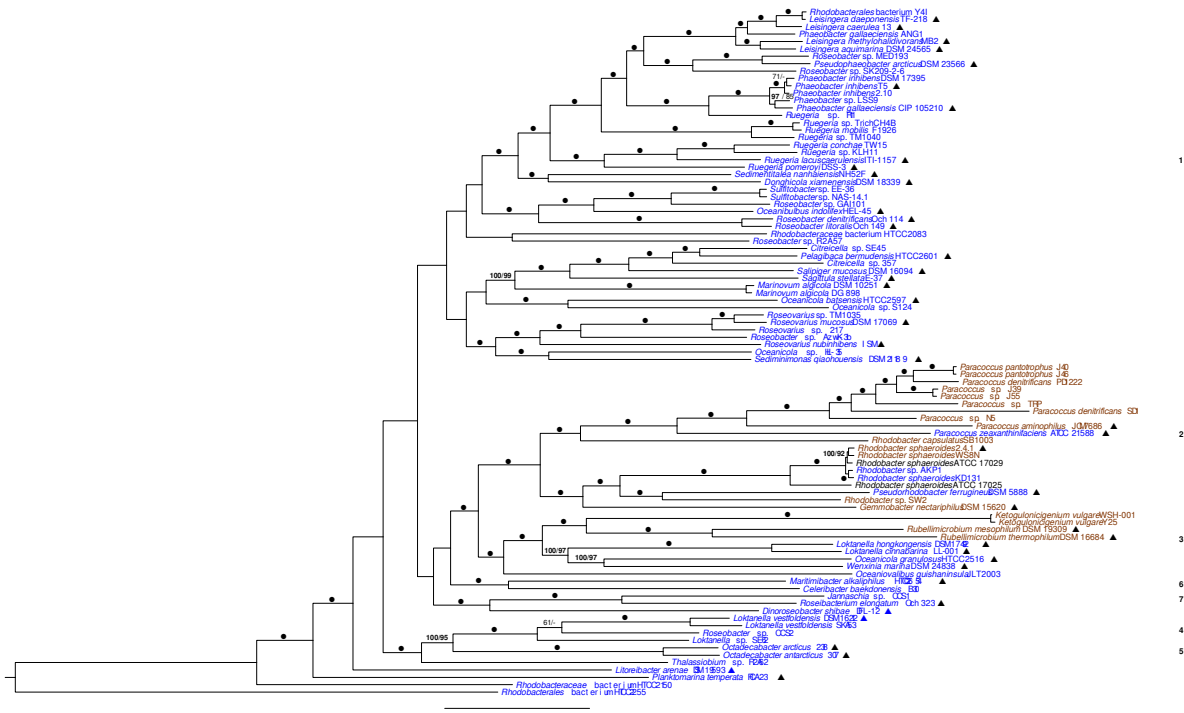

## G. Phylogenetic analysis of matrices generated without the outgroup

1. ML tree inferred from a second supermatrix including the 50 most conserved genes (generated anew after removal of the outgroup) under a single overall model of amino acid evolution and rooted according to the LSD results. The branches are scaled in terms of the expected number of substitutions per site. Numbers above branches (from left to right) are bootstrapping support values if larger than 60% from (i) ordinary bootstrap under ML with a single overall model of amino acid evolution; (ii) ordinary bootstrap under ML with one model per gene; (iii) partition bootstrap under ML; (iv) ordinary bootstrap under MP; (v) partition bootstrap under MP. Values larger than 95% are shown in bold; dots indicate branches with maximum support under all settings. For the groups see the caption of Fig. 1 in the main manuscript. Triangles indicate type strains. The colours of the tip labels indicate the habitat: blue, marine; brown, non-marine; uncoloured, unknown.

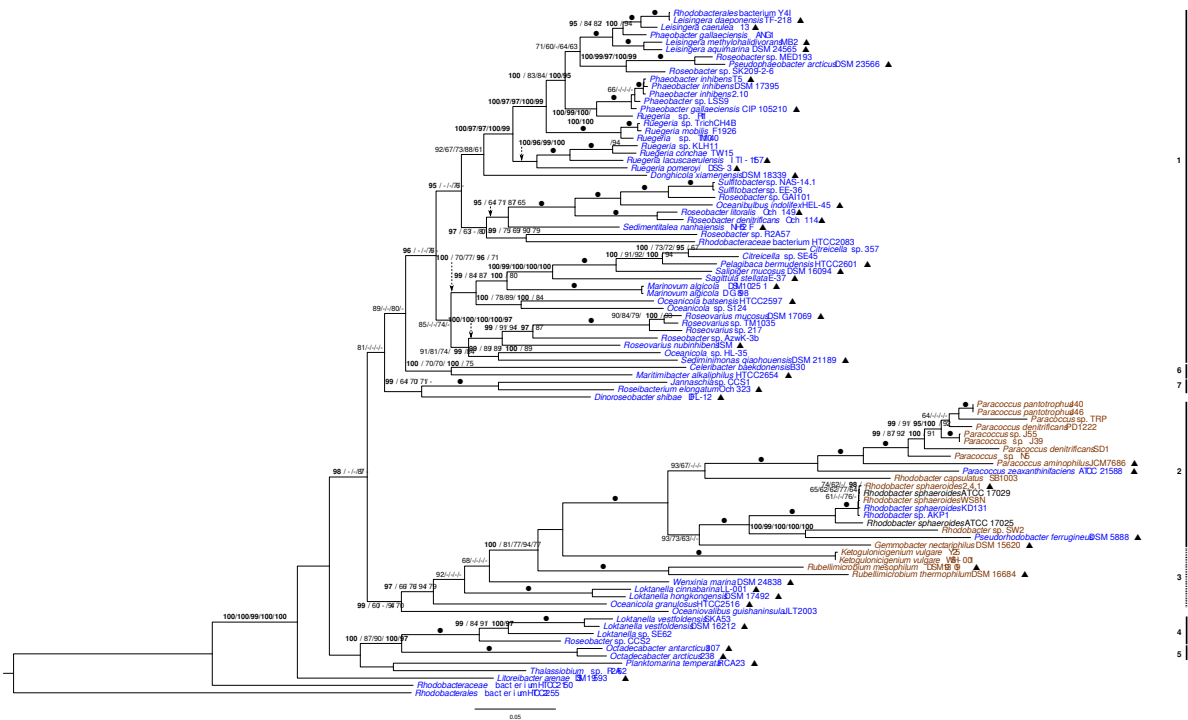

2. ML tree inferred from a second supermatrix including the 100 most conserved genes (generated anew after removal of the outgroup) under a single overall model of amino acid evolution and rooted according to the LSD results. The branches are scaled in terms of the expected number of substitutions per site. Numbers above branches (from left to right) are bootstrapping support values if larger than 60% from (i) ordinary bootstrap under ML with a single overall model of amino acid evolution; (ii) ordinary bootstrap under ML with one model per gene; (iii) partition bootstrap under ML; (iv) ordinary bootstrap under MP; (v) partition bootstrap under MP. Values larger than 95% are shown in bold; dots indicate branches with maximum support under all settings. For the groups see the caption of Fig. 1 in the main manuscript. Triangles indicate type strains. The colours of the tip labels indicate the habitat: blue, marine; brown, non-marine; uncoloured, unknown.

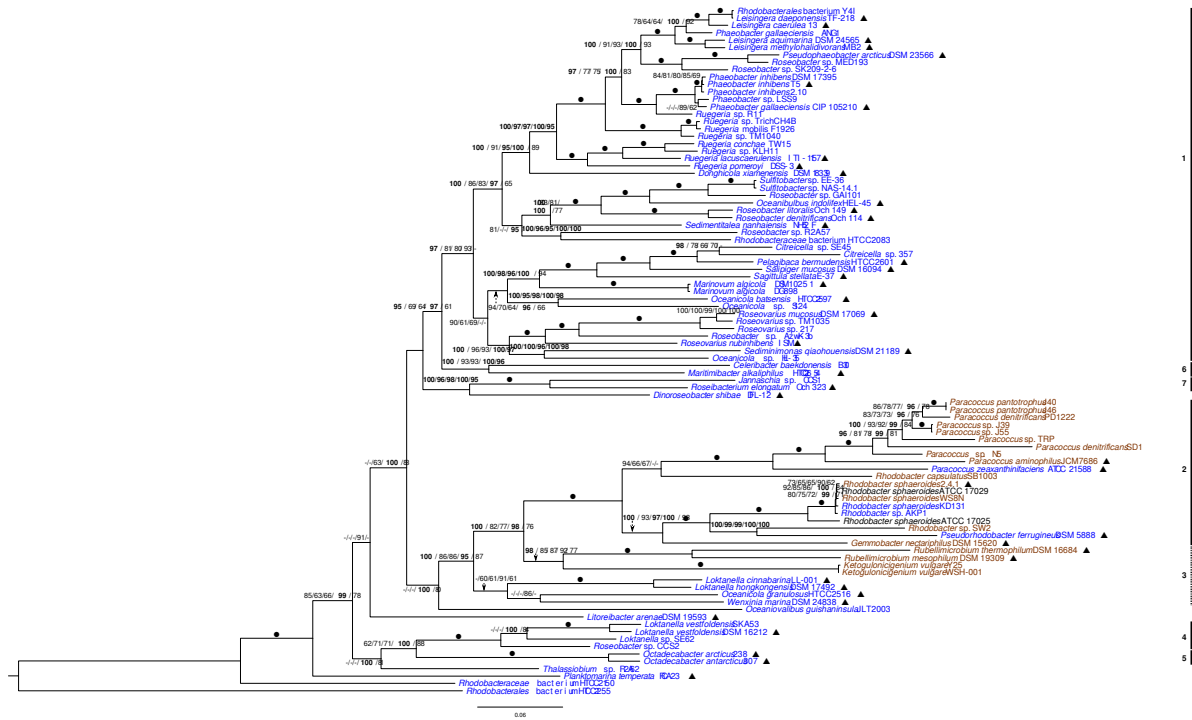

3. ML tree inferred from a second supermatrix including the 150 most conserved genes (generated anew after removal of the outgroup) under a single overall model of amino acid evolution and rooted according to the LSD results. The branches are scaled in terms of the expected number of substitutions per site. Numbers above branches (from left to right) are bootstrapping support values if larger than 60% from (i) ordinary bootstrap under ML with a single overall model of amino acid evolution; (ii) ordinary bootstrap under ML with one model per gene; (iii) partition bootstrap under ML; (iv) ordinary bootstrap under MP; (v) partition bootstrap under MP. Values larger than 95% are shown in bold; dots indicate branches with maximum support under all settings. For the groups see the caption of Fig. 1 in the main manuscript. Triangles indicate type strains. The colours of the tip labels indicate the habitat: blue, marine; brown, non-marine; uncoloured, unknown.

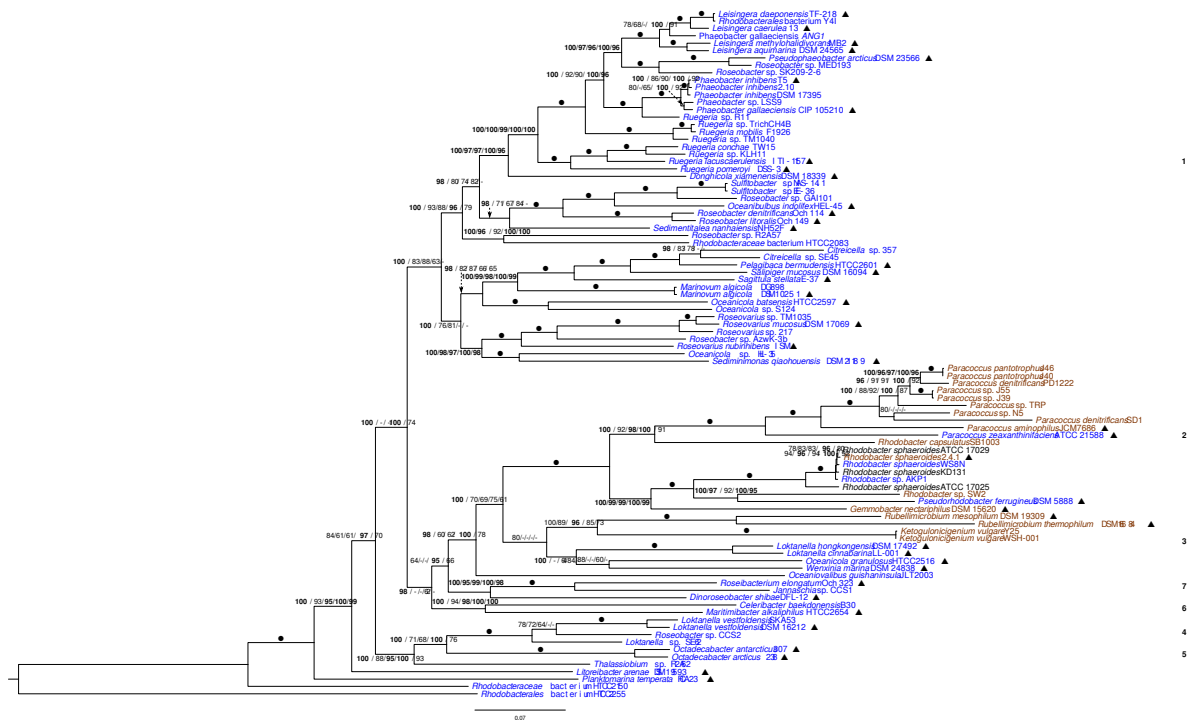

4. ML tree inferred from a second supermatrix including the 200 most conserved genes (generated anew after removal of the outgroup) under a single overall model of amino acid evolution and rooted according to the LSD results. The branches are scaled in terms of the expected number of substitutions per site. Numbers above branches (from left to right) are bootstrapping support values if larger than 60% from (i) ordinary bootstrap under ML with a single overall model of amino acid evolution; (ii) ordinary bootstrap under ML with one model per gene; (iii) partition bootstrap under ML; (iv) ordinary bootstrap under MP; (v) partition bootstrap under MP. Values larger than 95% are shown in bold; dots indicate branches with maximum support under all settings. For the groups see the caption of Fig. 1 in the main manuscript. Triangles indicate type strains. The colours of the tip labels indicate the habitat: blue, marine; brown, non-marine; uncoloured, unknown.

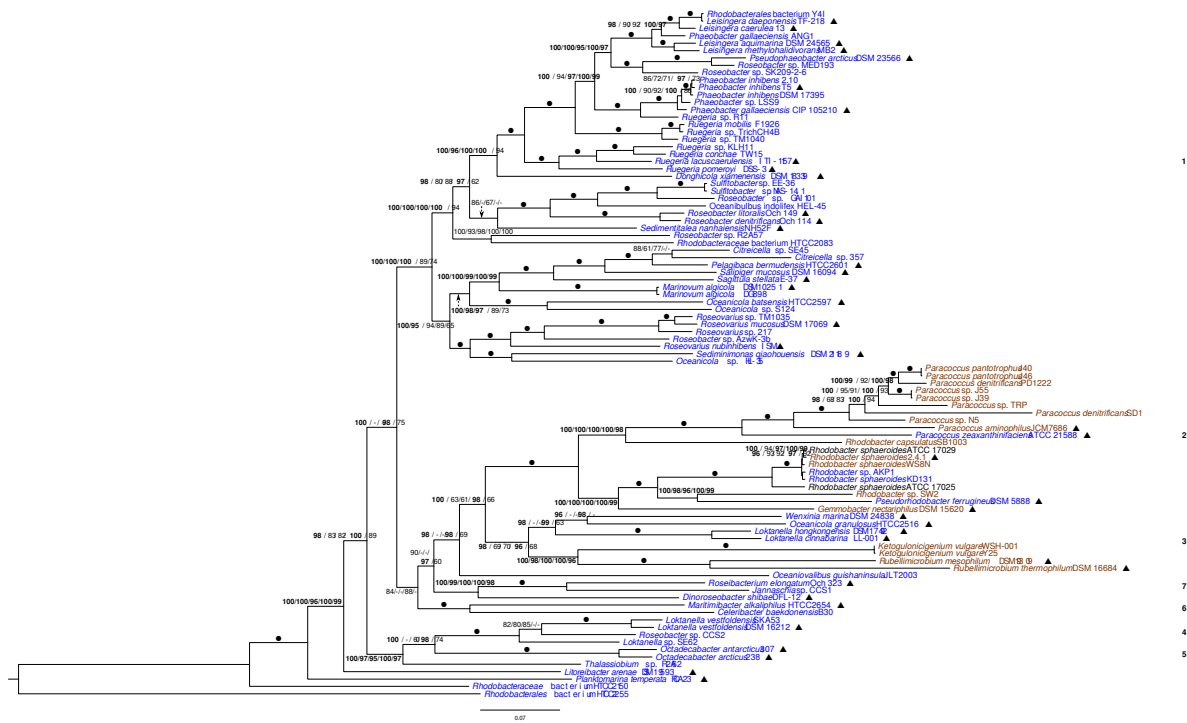



5. ML tree inferred from a second supermatrix including the 250 most conserved genes (generated anew after removal of the outgroup) under a single overall model of amino acid evolution and rooted according to the LSD results. The branches are scaled in terms of the expected number of substitutions per site. Numbers above branches (from left to right) are bootstrapping support values if larger than 60% from (i) ordinary bootstrap under ML with a single overall model of amino acid evolution; (ii) ordinary bootstrap under ML with one model per gene; (iii) partition bootstrap under ML; (iv) ordinary bootstrap under MP; (v) partition bootstrap under MP. Values larger than 95% are shown in bold; dots indicate branches with maximum support under all settings. For the groups see the caption of Fig. 1 in the main manuscript. Triangles indicate type strains. The colours of the tip labels indicate the habitat: blue, marine; brown, non-marine; uncoloured, unknown.

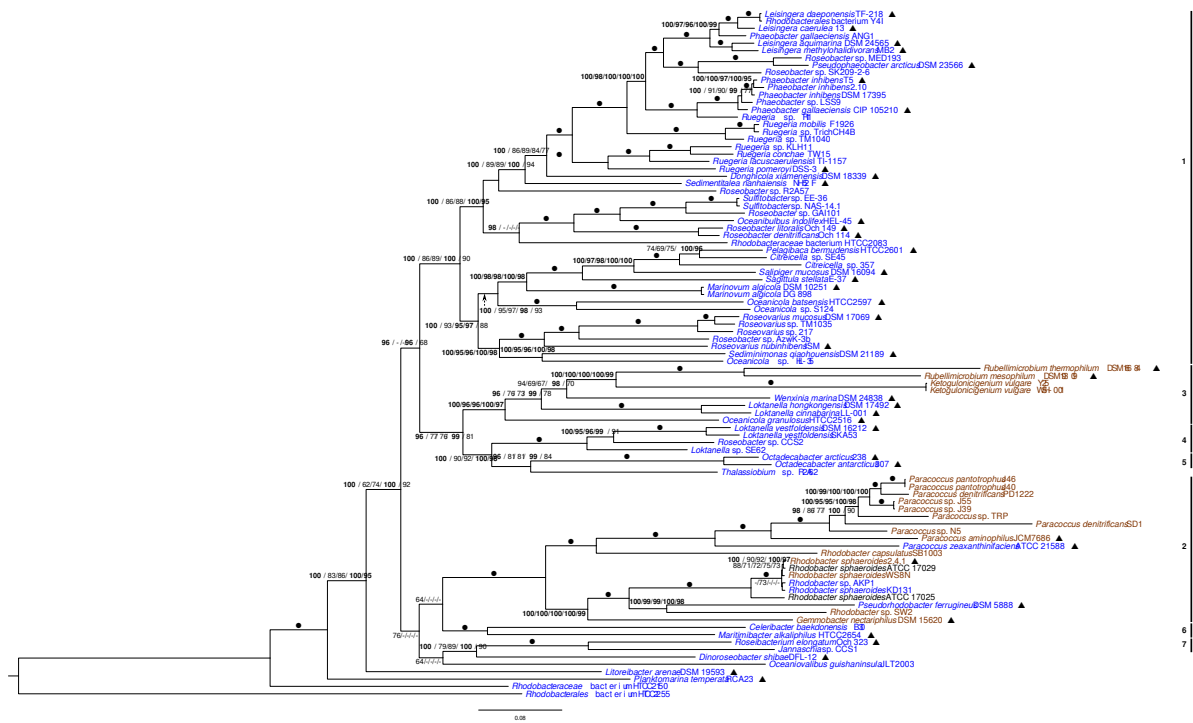

6. ML tree inferred from a second core-gene matrix (generated anew after removal of the outgroup) under a single overall model of amino acid evolution and rooted according to the LSD results. The branches are scaled in terms of the expected number of substitutions per site. Numbers above branches (from left to right) are bootstrapping support values if larger than 60% from (i) ordinary bootstrap under ML with a single overall model of amino acid evolution; (ii) ordinary bootstrap under ML with one model per gene; (iii) partition bootstrap under ML; (iv) ordinary bootstrap under MP; (v) partition bootstrap under MP. Values larger than 95% are shown in bold; dots indicate branches with maximum support under all settings. For the groups see the caption of Fig. 1 in the main manuscript. Triangles indicate type strains. The colours of the tip labels indicate the habitat: blue, marine; brown, non-marine; uncoloured, unknown.

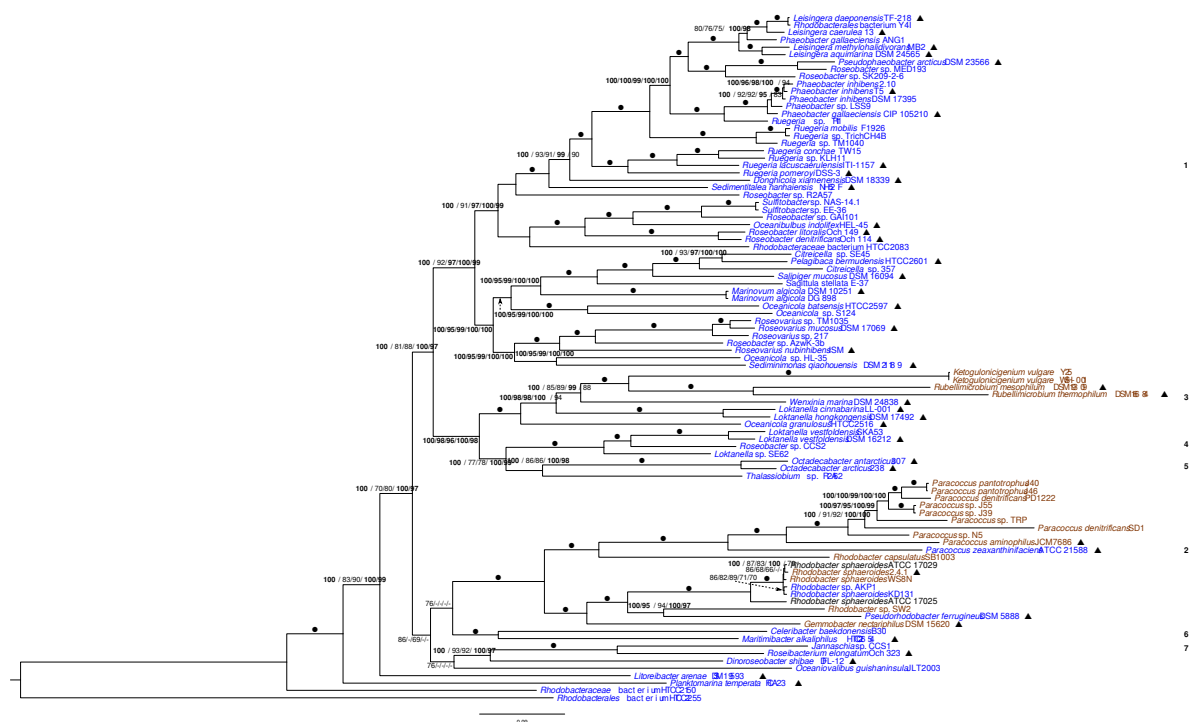

7. ML tree inferred from a second MARE-filtered supermatrix (generated anew after removal of the outgroup) under a single overall model of amino acid evolution and rooted according to the LSD results. The branches are scaled in terms of the expected number of substitutions per site. Numbers above branches (from left to right) are bootstrapping support values if larger than 60% from (i) ordinary bootstrap under ML with a single overall model of amino acid evolution; (ii) ordinary bootstrap under ML with one model per gene; (iii) partition bootstrap under ML; (iv) ordinary bootstrap under MP; (v) partition bootstrap under MP. Values larger than 95% are shown in bold; dots indicate branches with maximum support under all settings. For the groups see the caption of Fig. 1 in the main manuscript. Triangles indicate type strains. The colours of the tip labels indicate the habitat: blue, marine; brown, non-marine; uncoloured, unknown.

[Omitted for reasons of running time.]

8. ML tree inferred from a second “full” supermatrix (generated anew after removal of the outgroup) under a single overall model of amino acid evolution and rooted according to the LSD results. The branches are scaled in terms of the expected number of substitutions per site. Numbers above branches (from left to right) are bootstrapping support values if larger than 60% from (i) ordinary bootstrap under MP; (ii) partition bootstrap under MP. Values larger than 95% are shown in bold; dots indicate branches with maximum support under all settings. For the groups see the caption of Fig. 1 in the main manuscript. Triangles indicate type strains. The colours of the tip labels indicate the habitat: blue, marine; brown, non-marine; uncoloured, unknown.

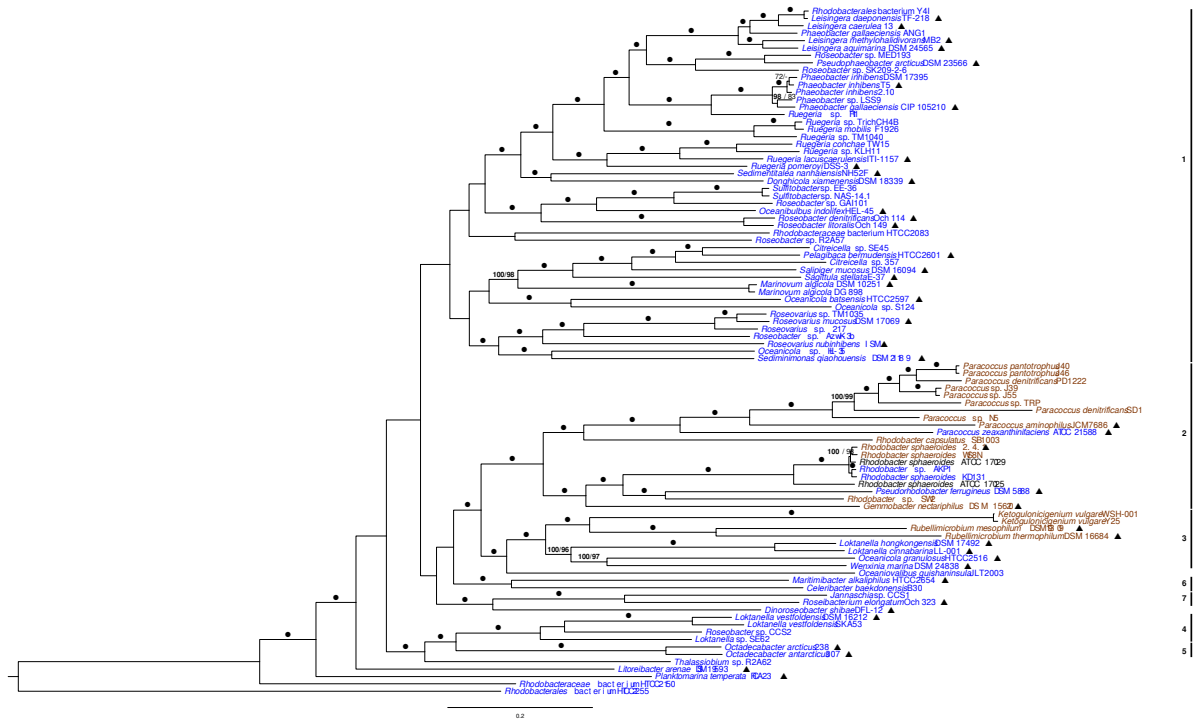

## H. 16S rRNA gene pairwise similarities and paired-site tests

Histograms of all possible pairwise 16S rRNA gene similarities between the following groups: *Rhodobacteraceae* except *Roseobacter* group (A), *Roseobacter* group (B) and outgroup (C). Labels 'AA', 'BB' and 'CC' denote the respective within-group similarities.

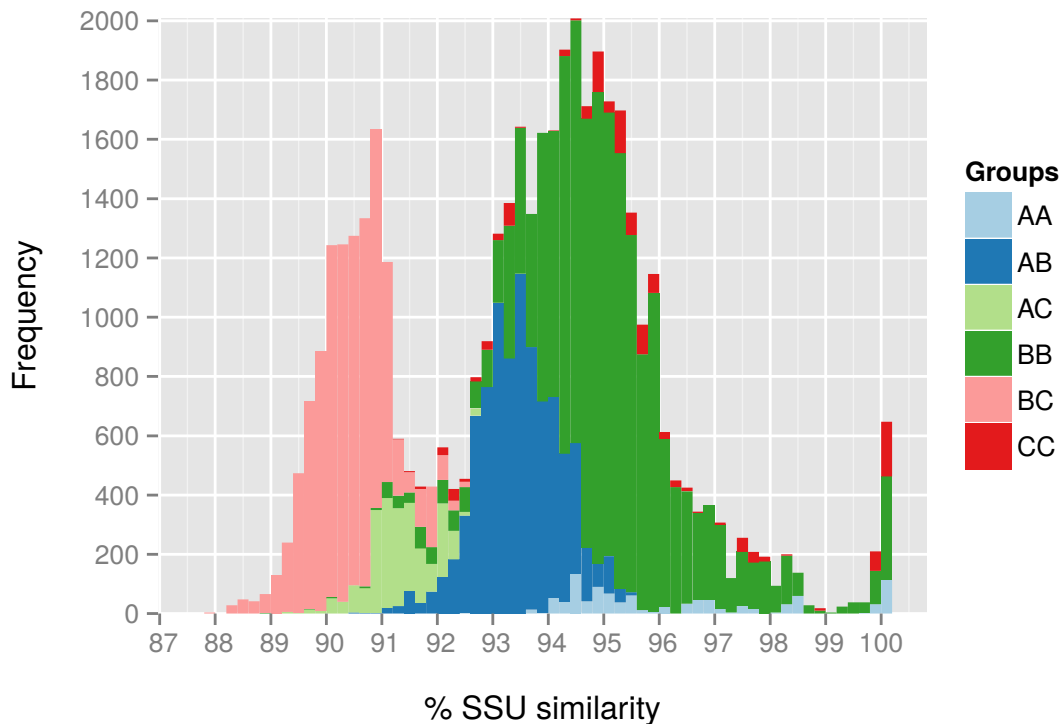

The 16S rRNA gene sequences extracted from the genomes showed similarity values of >89% in all pairwise comparisons of *Rhodobacteraceae*, not only in the pairwise comparisons of roseobacters (supplementary file 2); similarities  $\leq 89\%$  were only observed between outgroup and *Rhodobacteraceae* sequences.

Results of the paired-site tests of the 16S rRNA gene sequences under MP. The constraints enforced the monophyly of all included strains except for: Constraint 1, *Rhodobacterales* bacterium HTCC2255 and outgroup; Constraint 2, *Rhodobacterales* bacterium HTCC2255, *Rhodobacteraceae* bacterium HTCC2150 and outgroup; Constraint 3, *Rhodobacterales* bacterium HTCC2255, *Rhodobacteraceae* bacterium HTCC2150, *Planktomarina temperata* RCA23<sup>T</sup> and outgroup; Constraint 4, *Rhodobacterales* bacterium HTCC2255, *Rhodobacteraceae* bacterium HTCC2150, *Planktomarina temperata* RCA23<sup>T</sup>, *Litoreibacter arenae* DSM 19593<sup>T</sup> and outgroup. The best trees under each constraint were compared with the best trees from unconstrained search.

| Best tree(s)  | MP score | Number of best MP trees | p-value Wilcox | P-value T-test |
|---------------|----------|-------------------------|----------------|----------------|
| Unconstrained | 3262     | 9                       | -              | -              |

|              |      |    |                 |                 |
|--------------|------|----|-----------------|-----------------|
|              |      |    |                 |                 |
| Constraint 1 | 3264 | 18 | 0.41121-0.54026 | 0.44743-0.45270 |
| Constraint 2 | 3270 | 13 | 0.26162-0.31018 | 0.27248-0.29260 |
| Constraint 3 | 3270 | 9  | 0.28361-0.36064 | 0.27912-0.32615 |
| Constraint 4 | 3275 | 15 | 0.14461-0.18642 | 0.16461-0.19657 |

Results of the paired-site tests of the 16S rRNA gene sequences under ML. The constraints enforced the monophyly of all included strains except for: Constraint 1, *Rhodobacterales* bacterium HTCC2255 and outgroup; Constraint 2, *Rhodobacterales* bacterium HTCC2255, *Rhodobacteraceae* bacterium HTCC2150 and outgroup; Constraint 3, *Rhodobacterales* bacterium HTCC2255, *Rhodobacteraceae* bacterium HTCC2150, *Planktomarina temperata* RCA23<sup>T</sup> and outgroup; Constraint 4, *Rhodobacterales* bacterium HTCC2255, *Rhodobacteraceae* bacterium HTCC2150, *Planktomarina temperata* RCA23<sup>T</sup>, *Litoreibacter arenae* DSM 19593<sup>T</sup> and outgroup. The best tree under each constraint was compared with the best tree from unconstrained search.

| Best tree(s)  | Log likelihood | p-value AU test | p-value Wilcox | P-value T-test        |
|---------------|----------------|-----------------|----------------|-----------------------|
| Unconstrained | -17315.899407  | -               | -              | -                     |
| Constraint 1  | -17344.731674  | 0.633           | 1              | 0.461546575404<br>846 |
| Constraint 2  | -17339.357087  | 0.390           | 1              | 0.305064211535<br>987 |
| Constraint 3  | -17356.114526  | 0.244           | 1              | 0.252909446924<br>49  |
| Constraint 4  | -17330.499514  | 0.371           | 1              | 0.335270693544<br>713 |

The best 16S rRNA gene trees from unconstrained search were not significantly better than the best trees obtained by enforcing the monophyly of the ingroup strains excluding “*Rhodobacterales* bacterium” HTCC2255, “*Rhodobacteraceae* bacterium” HTCC2150 or *Planktomarina temperata* RCA23<sup>T</sup>, confirming the result from bootstrapping that the 16S rRNA gene does not significantly support the *Roseobacter* clade.

# I. Ancestral character-state reconstruction on the MARE-filtered supermatrix tree

1. Ancestral character-state reconstruction under ordered MP for the presence (black) or absence (white) of H, marine or equivalent habitat; I, (S)-2-haloacid dehalogenase (EC 3.8.1.2); II, ectoine synthase (EC 4.2.1.108); III, 6-phosphofructokinase (EC 2.7.1.11). The tree topology is as in figure C/8. Grey shading indicates uncertainties in character-state assignment. The major types of phylogenetic distributions represented by the three genomic characters are: I, losses predominantly in non-marine strains; II, gains mainly in marine strains; III, gains predominantly in non-marine strains.

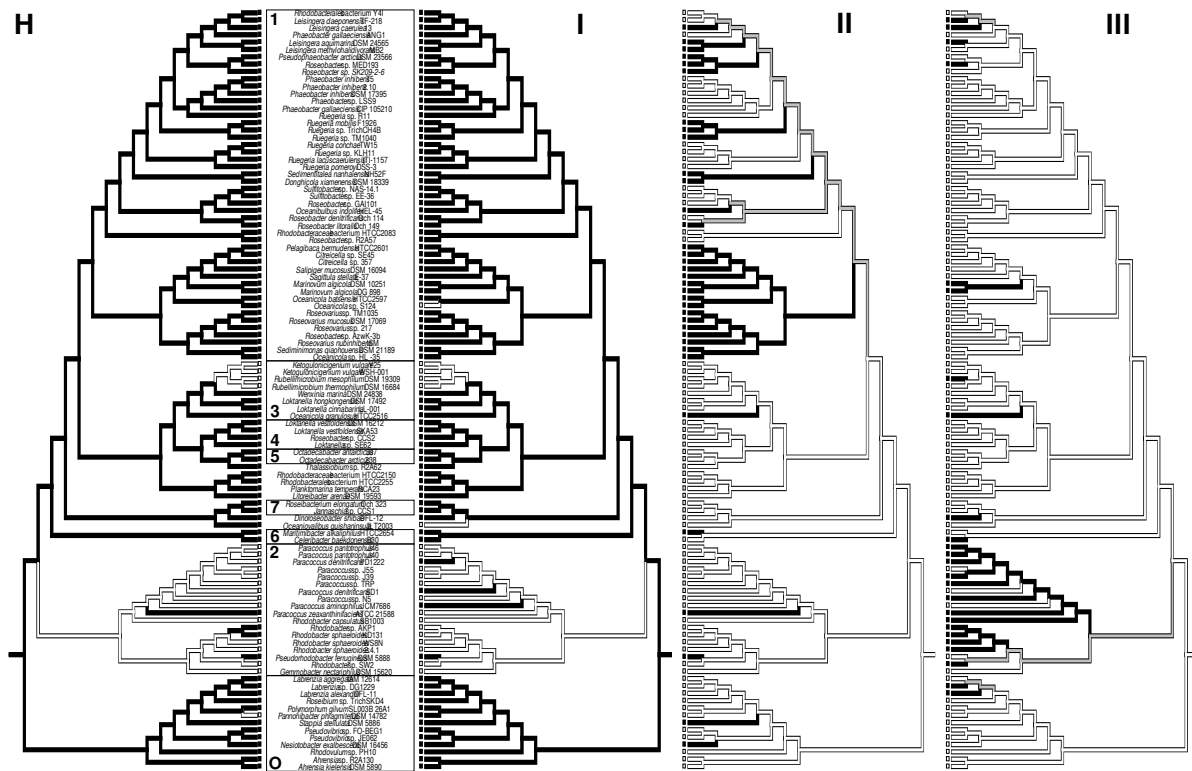

2. Ancestral character-state reconstruction under ordered MP for the presence (black) or absence (white) of H, marine or equivalent habitat; I, (S)-2-haloacid dehalogenase (EC 3.8.1.2); II, ectoine synthase (EC 4.2.1.108); III, 6-phosphofructokinase (EC 2.7.1.11). The tree topology is as in figure C/9. Grey shading indicates uncertainties in character-state assignment. The major types of phylogenetic distributions represented by the three genomic characters are: I, losses predominantly in non-marine strains; II, gains mainly in marine strains; III, gains predominantly in non-marine strains.

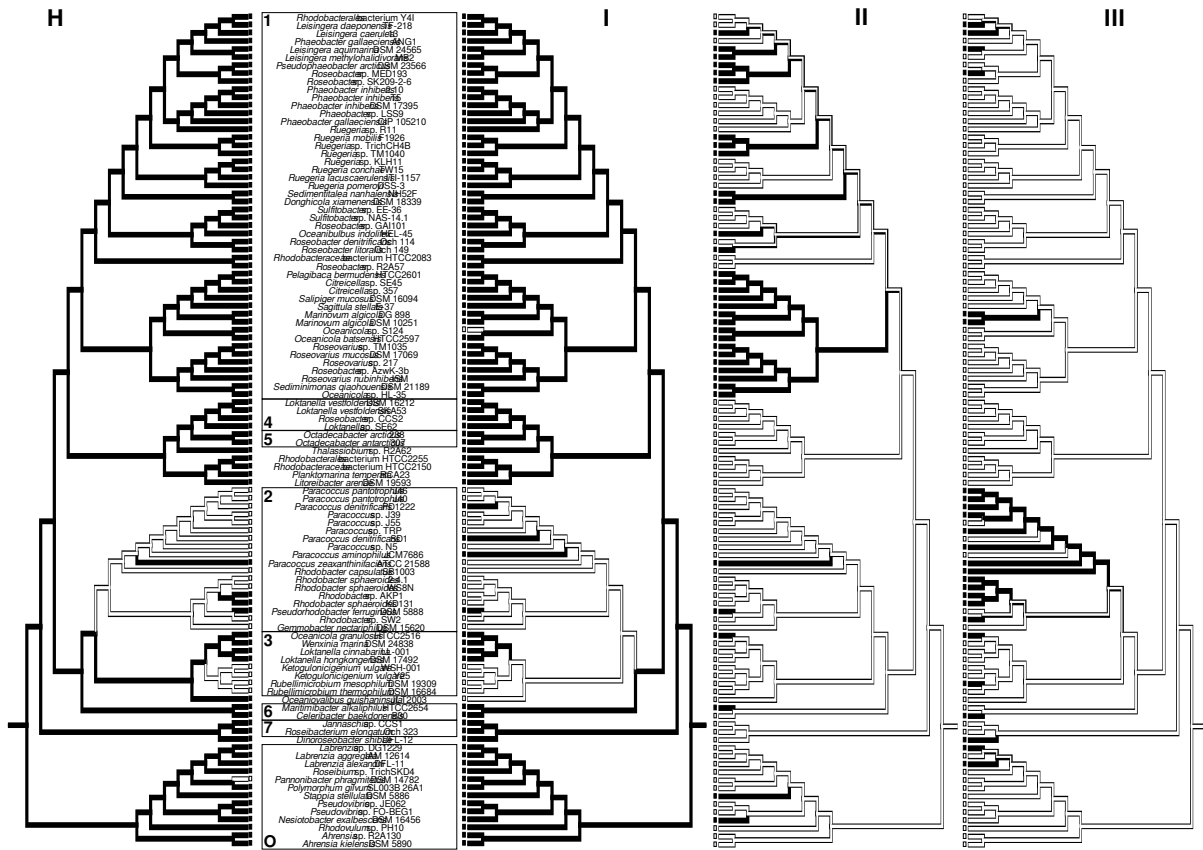



## **J. Ancestral character-state reconstructions of the number of extrachromosomal replicons per type of replication system**

Overall we identified 325 plasmid replication modules in the 106 strains investigated in the current study and determined their compatibility groups (supplementary file 1). The ingroup genomes harboured between zero and 12 and on average 3.3 ECRs, and nearly all of their 307 replication modules fit into the existing classification scheme (Petersen et al. 2009 and 2011). Additional subtypes of the RepA-, RepB- and RepABC-type replication systems (supplementary file 1) might represent further yet unknown compatibility groups. We identified five new subtypes of replication systems with specific palindrome sequences (C-10, C-13, C-14, C-15, C-18) (Petersen et al. 2009), and the presence of two RepABC-9 subtype ECRs in *Leisingera daeponensis* TF-218T and *Marinovum algicola* DSM 10251T indicates that the existing classification scheme has to be extended. The current study represents the most comprehensive comparison of ECRs in *Rhodobacteraceae* and revealed the presence of up to twelve replicons (chromosome, chromids, plasmids; Harrison et al. 2010) in a single bacterium (supplementary file 1), which is in agreement with former results from the physical separation with the pulsed-field technology (Pradella et al. 2004 and 2010). Nevertheless, the identification of at least 23 distinct compatibility groups in *Rhodobacteraceae* indicates that individual roseobacter strains may harbour more than twelve replicons as recently reported for *Marinovum algicola* DG898 (Frank et al. 2015a). The abundance of the different plasmid types in *Rhodobacteraceae* is further reflected by 53 DnaA-like, 79 RepA, 52 RepB and 140 RepABC replication modules.

The replicases of the 18 ECRs in the outgroup genomes (2x RepA, 16x RepABC) grouped together with rhizobial sequences and were clearly separated from those of *Rhodobacteraceae* (Petersen et al. 2009). The sole exception is the replicase subtype RepABC-9 that branches as separate subtree within *Rhizobiales* as previously shown (Petersen et al. 2009). Our phylogeny-based classification of 325 plasmid replication systems thus documented that ECRs from *Rhodobacteraceae* belong to compatibility groups distinct from those found in the outgroup strains (supplementary file 1). In contrast, the BayesTraits analyses showed no correlation between the presence of ECRs and the habitat (supplementary file 4). Based on their ECR replication systems the marine *Rhodobacteraceae* are indistinguishable from non-marine ones (Petersen et al. 2009). This finding is in line with the fact that marine and non-marine *Rhodobacteraceae* are not phylogenetically separated (fig. 1).

In contrast, the presences and absences of ECR types DnaA-like, RepA and RepB significantly depended on each other, whereas RepABC showed no significant relationships to the others (fig. 3, supplementary file 4).

1. Ancestral character-state reconstruction under ordered MP for the number of ECR replicases of the distinct types DnaA, RepA, RepB and RepABC, and according pairwise phylogenetic cross-comparisons of their abundances in each genome. For the labels see figure V/1, where the same tree topology is depicted in exactly the same layout. The numbers between the trees refer to the clades as indicated in figure C/8 (O = outgroup). The colours indicate the number of replicases of each type as follows: white, 0; blue, 1; green, 2; yellow, 3; orange, 4; red, 5; black, 6. Presences and absences alone are correlated between DnaA, RepA and RepB but not between RepABC and the others.

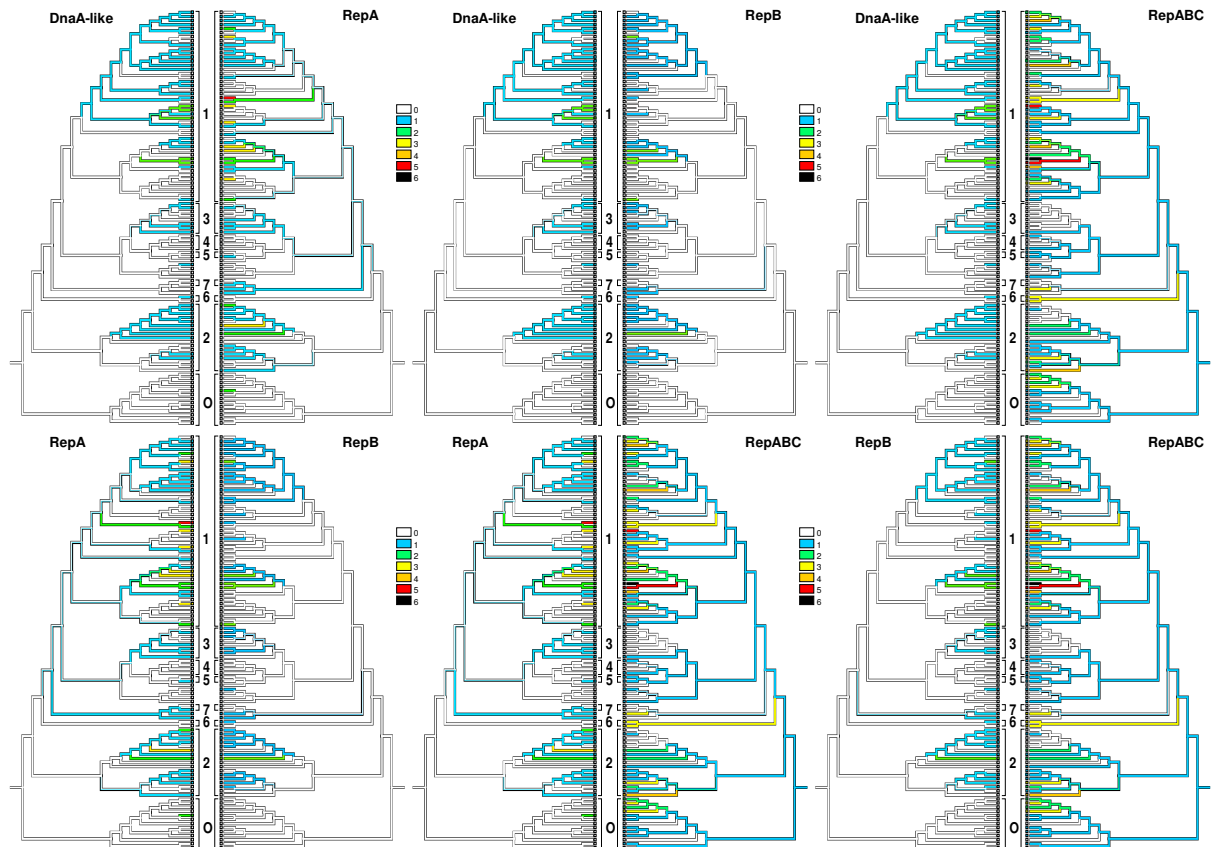

2. Ancestral character-state reconstruction under ordered MP for the number of ECR replicases of the distinct types DnaA, RepA, RepB and RepABC, and according pairwise phylogenetic cross-comparisons of their abundances in each genome. For the labels see figure V/2, where the same tree topology is depicted in exactly the same layout. The numbers between the trees refer to the clades as indicated in figure C/9 (O = outgroup). The colours indicate the number of replicases of each type as follows: white, 0; blue, 1; green, 2; yellow, 3; orange, 4; red, 5; black, 6. Presences and absences alone are correlated between DnaA, RepA and RepB but not between RepABC and the others.

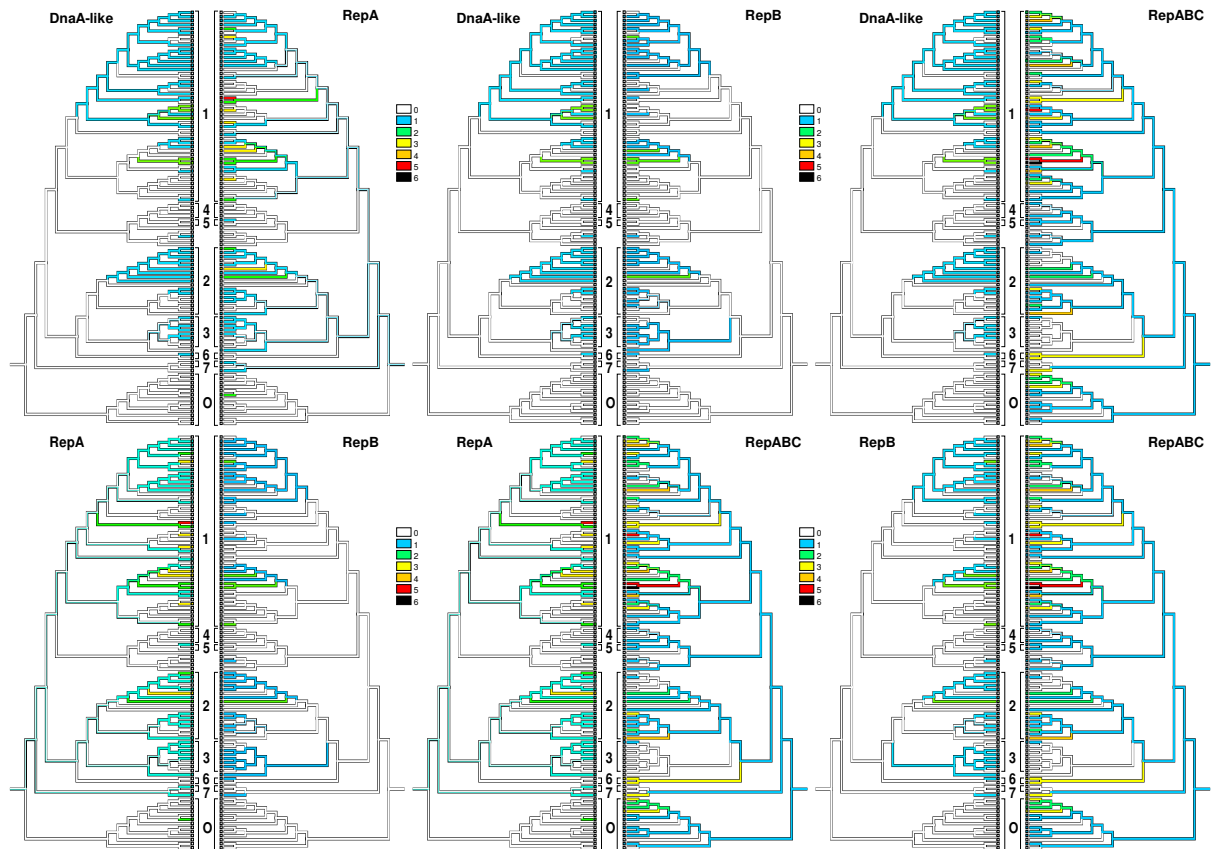

## K. Results of the tip-permutation test for the phylogenetic conservation of number of extrachromosomal replicons per type of replication system

In the tip-permutation tests, the occurrences of all replication systems were phylogenetically conserved; after removal of the outgroup, only RepB and DnaA-like showed a significant conservation under all conditions. The significant positive correlations between the plasmid types DnaA-like, RepA and RepB, but not RepABC, is in agreement with their occurrence on evolutionarily stable chromids, which exhibit a codon usage comparable to that of each chromosome (Harrison et al. 2010). In contrast, RepABC-type ECRs frequently show a deviating codon usage and thus represent genuine plasmids. A prime example is the genus *Phaeobacter* with conserved RepA-I, RepB-I and DnaA-like I type chromids as well as a mobile gene pool essentially represented by RepABC-type plasmids (Frank et al. 2014; Dogs et al. 2013). Many of these plasmids contain type-IV secretion systems indicating that they are subjected to horizontal transfer between *Rhodobacteraceae* via conjugation (Petersen et al. 2013). This prediction is in line with the results of the permutation tests (supplementary file 1), suggesting a higher phylogenetic conservation in the other replication systems, and the higher number of phylogenetic correlations of the occurrences of RepABC and RepA with the presence of COGs associated with type-IV secretion.

The trees used were inferred using ML from the indicated matrices. Permutation tests were conducted either with or without removing the outgroup strains from the tree. Length, number of steps (MP score) of the unpermuted tree; CI, consistency index; RI, retention index.

| Tree               | Dataset | Number | Character | Length | P-value | CI    | RI    |
|--------------------|---------|--------|-----------|--------|---------|-------|-------|
| core genes all     |         | 1      | DnaA-like | 22     | 0.001   | 0.091 | 0.608 |
| core genes all     |         | 2      | RepA      | 52     | 0.008   | 0.096 | 0.365 |
| core genes all     |         | 3      | RepB      | 28     | 0.001   | 0.071 | 0.480 |
| core genes all     |         | 4      | RepABC    | 80     | 0.005   | 0.075 | 0.253 |
| core genes ingroup |         | 1      | DnaA-like | 22     | 0.001   | 0.091 | 0.574 |
| core genes ingroup |         | 2      | RepA      | 50     | 0.061   | 0.100 | 0.274 |
| core genes ingroup |         | 3      | RepB      | 28     | 0.002   | 0.071 | 0.480 |
| core genes ingroup |         | 4      | RepABC    | 74     | 0.012   | 0.081 | 0.244 |
| MARE               | all     | 1      | DnaA-like | 22     | 0.001   | 0.091 | 0.608 |
| MARE               | all     | 2      | RepA      | 52     | 0.004   | 0.096 | 0.365 |
| MARE               | all     | 3      | RepB      | 28     | 0.001   | 0.071 | 0.480 |
| MARE               | all     | 4      | RepABC    | 80     | 0.007   | 0.075 | 0.253 |

|      |         |             |    |       |       |       |
|------|---------|-------------|----|-------|-------|-------|
| MARE | ingroup | 1 DnaA-like | 22 | 0.001 | 0.091 | 0.574 |
| MARE | ingroup | 2 RepA      | 50 | 0.063 | 0.100 | 0.274 |
| MARE | ingroup | 3 RepB      | 28 | 0.002 | 0.071 | 0.480 |
| MARE | ingroup | 4 RepABC    | 74 | 0.012 | 0.081 | 0.244 |
| full | all     | 1 DnaA-like | 22 | 0.001 | 0.091 | 0.608 |
| full | all     | 2 RepA      | 50 | 0.001 | 0.100 | 0.392 |
| full | all     | 3 RepB      | 27 | 0.001 | 0.074 | 0.500 |
| full | all     | 4 RepABC    | 77 | 0.001 | 0.078 | 0.283 |
| full | ingroup | 1 DnaA-like | 22 | 0.001 | 0.091 | 0.574 |
| full | ingroup | 2 RepA      | 48 | 0.009 | 0.104 | 0.306 |
| full | ingroup | 3 RepB      | 27 | 0.002 | 0.074 | 0.500 |
| full | ingroup | 4 RepABC    | 71 | 0.002 | 0.085 | 0.278 |

## L. Relationship between genome size and oligotrophy

Oligotrophy index plotted against the genome size. Colours indicate major *Rhodobacteraceae* clades as defined in the main manuscript. The correlation, as determined using the Kendall coefficient, was not significant ( $\alpha = 0.05$ ), but small genomes show a huge variety of oligotrophy indexes, whereas larger genomes are usually copiotrophic.

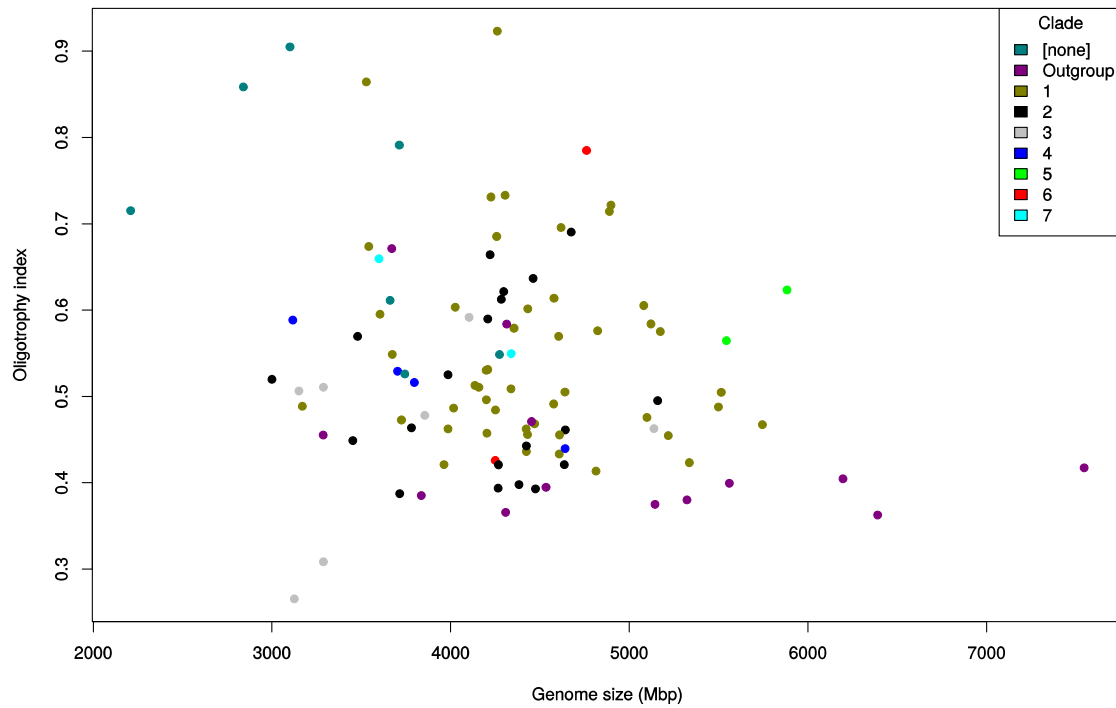

## M. Relationship between genome size and number of ECRs

Number of extrachromosomal replicons (ECRs) plotted against the oligotrophy index. The correlation, as determined using the Kendall coefficient, was not significant ( $\alpha = 0.05$ ).

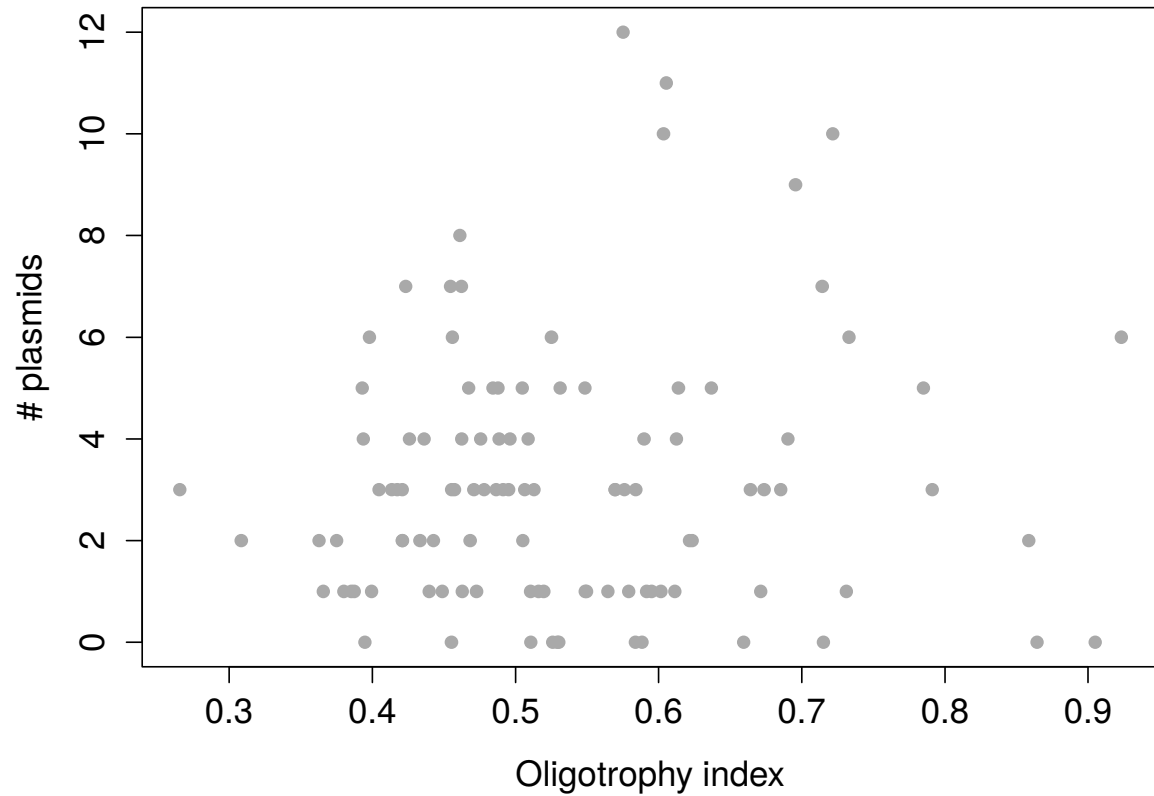

## **N. Whole proteome-based phylogenomic tree using the GBDP approach**

Phylogeny is based on all pairwise intergenomic distances between the proteomes of 132 strains as calculated by GBDP's latest version (Meier-Kolthoff et al. 2013) and inferred using FastME v2.07 with TBR postprocessing (Lefort et al. 2015). The following GBDP settings were used: trimming algorithm, e-value threshold of  $10^{-8}$  and formula  $d_5$ . Numbers above branches are greedy-with-trimming pseudo-bootstrap (Meier-Kolthoff et al. 2014) support values from 100 replicates and only branch support values above 60 % are shown. The tree was visualized using the web service 'Interactive Tree of Life' (Letunic and Bork 2011). Leaf labels are annotated according to their affiliation to previously established clades, with the only exception of the novel 'CLADE 8', which emerged from the addition of strain *Roseobacter* sp. LE17 to this increased dataset.



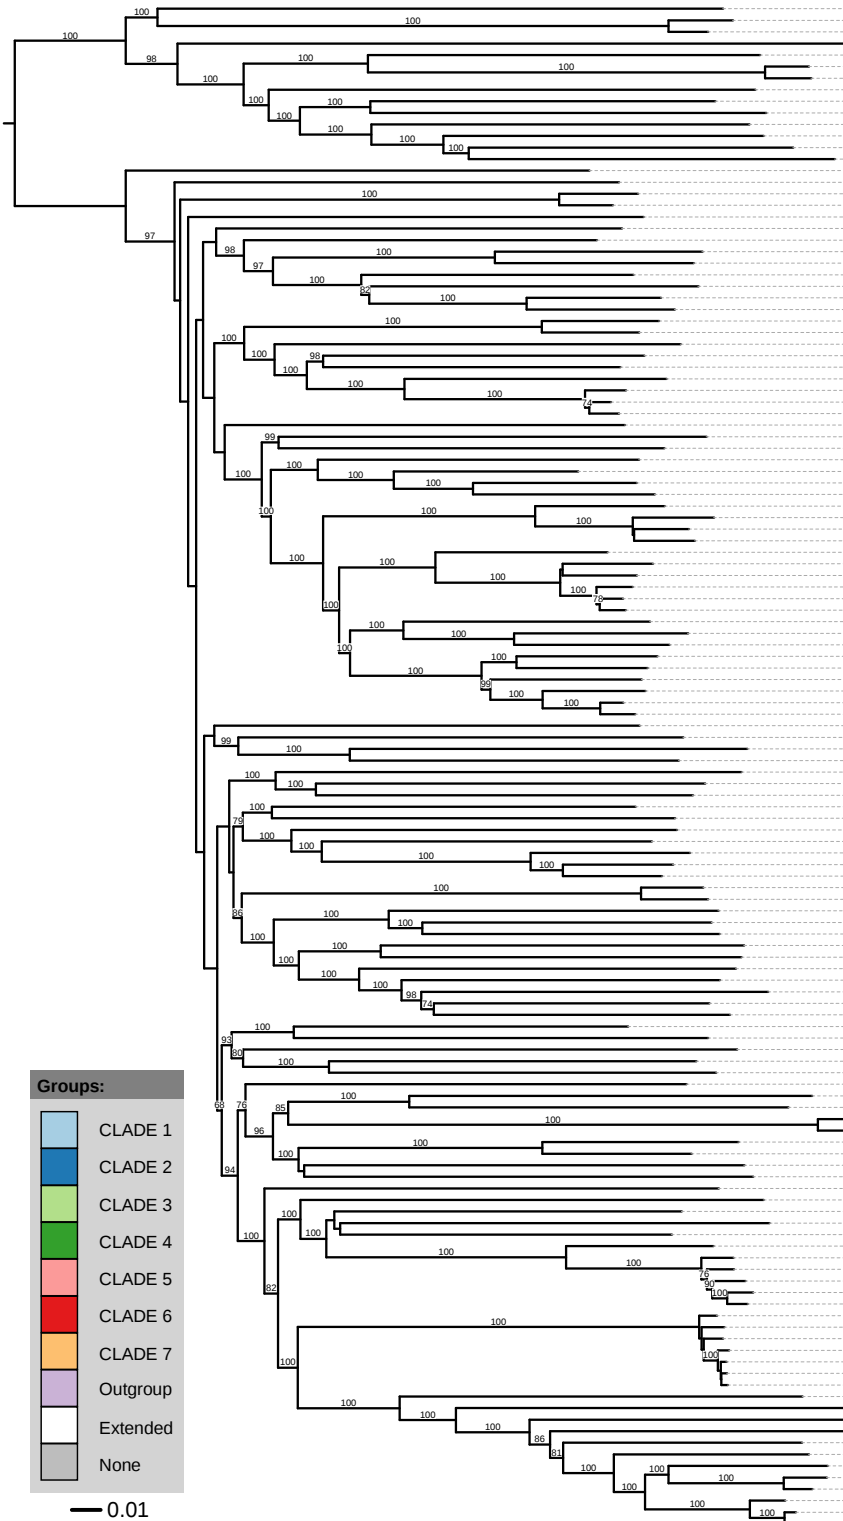

**Groups:**

- CLADE 1
- CLADE 2
- CLADE 3
- CLADE 4
- CLADE 5
- CLADE 6
- CLADE 7
- Outgroup
- Extended
- None

— 0.01

- Ahrensia sp. R2A130
- Ahrensia kielensis DSM 5890T
- Ahrensia sp. 13\_GOM-1096m
- Rhodovulum sp. PH10
- Nesiotobacter exalbecens DSM 16456T
- Pseudovibrio sp. JE062
- Pseudovibrio sp. FO-BEG1
- Stappia stellata DSM 5896T
- Polymorphum gilvum SL003B-26A1
- Pannonibacter phragmitetus DSM 14782T
- Roseobium sp. TrichSKD4
- Labrenzia alexandrii DFL-11T
- Labrenzia aggregata IAM 12614T
- Labrenzia sp. DG1229
- Rhodobacteriales bacterium HTCC2255
- Rhodobacteriaceae bacterium HTCC2150
- Planktomarina temperata RCA23T
- Roseobacter sp. LE17
- Rhodobacteriaceae sp. HIMB11
- Rhodobacteriaceae bacterium HTCC2083
- Thalassiosibium sp. R2A62
- Octadecabacter arcticus 238T
- Octadecabacter antarcticus 307T
- Roseobacter sp. CCS2
- Loktanelia sp. SE52
- Loktanelia vestfoldensis SKA53
- Loktanelia vestfoldensis DSM 16212T
- Roseobacter litoralis Och 149T
- Roseobacter denitrificans Och 114T
- Sulfitobacter sp. 20\_GPM-1509m
- Oceanibulbus indolifex HEL-45T
- Sulfitobacter mediterraneus IFIGIMAR09
- Roseobacter sp. GAI101
- Sulfitobacter sp. NAS-14.1
- Sulfitobacter pontiacus 3SOLIMAR09
- Sulfitobacter sp. EE-36
- Roseobacter sp. R2A57
- Donghicola xiamenensis Y-2T (DSM 18339T)
- Sedimentitalea nanhaiensis NH52FT
- Ruegeria pomeroyi DSS-3T
- Ruegeria lacuscaerulensis ITI-1157T
- Ruegeria conchae TW15T
- Ruegeria sp. KLH11
- Ruegeria sp. TM1040
- Ruegeria mobilis F1926
- Ruegeria sp. Trich CH4B
- Ruegeria mobilis 45A6
- Ruegeria sp. R11
- Phaeobacter sp. LSS9
- Phaeobacter galliciensis CIP105210T
- Phaeobacter inhibens DSM 17385
- Phaeobacter inhibens TST (DSM 16374T)
- Phaeobacter inhibens 2.1
- Roseobacter sp. SK209-2.6
- Pseudophaeobacter arcticus DSM 23566T
- Roseobacter sp. MED193
- Leisingera aquimarina DSM 24565T
- Leisingera methylhalodivorans MB2T
- Phaeobacter galliciensis ANG1
- Leisingera caerulea 13T (DSM 24564T)
- Rhodobacteriales bacterium Y41
- Leisingera daeponensis TF-218T
- Litorea bacter arenae DSM 19593T
- Dinoroseobacter shibae DFL-12T
- Jannaschia sp. CCS1
- Roseibacterium elongatum Och 323T
- Oceanicola sp. S124
- Oceanicola baltensis HTCC2597T
- Oceanicola nanhaiensis DSM 18065T
- Sedimentimonas qiaohouensis DSM 21189T
- Oceanicola sp. HL-35
- Roseovarius nubinihibens ISMT
- Roseovarius sp. AzWK-3b
- Roseovarius sp. 217.00
- Roseovarius mucosus DSM 17069T
- Roseovarius sp. TM1035
- Marinovum algicola DG 898
- Marinovum algicola DSM 10251T
- Rosevivax isoporaе LMG 25204T
- Rosevivax halodurans JCM 10272T
- Rosevivax sp. 22II-s10s
- Sagittula stellata E-37T
- Rhodobacteriaceae bacterium PD-2
- Salipiger mucosus DSM 16094T
- Citricella sp. 357.00
- Donghicola sp. SS58
- Peilgibacter bermudensis HTCC2601T
- Citricella sp. SE45
- Acilbacterium sp. 22II-S11-z10
- Actibacterium mucosum KCTC 23349T
- Csribacter baekdorensis B30
- Maritimibacter sp. HL-12
- Maritimibacter alkaliphilus HTCC2554T
- Oceanovallus gushanensis JLT2003
- Rubellimicrobium mesophilum DSM 19309T
- Rubellimicrobium thermophilum DSM 16684T
- Ketogulonicigenium vulgare WSH-001
- Ketogulonicigenium vulgare Y25
- Loktanelia cinnabarina LL-001T
- Loktanelia hongkongensis DSM 17492T
- Wenxinia marina DSM 24838T
- Oceanicola granulosus HTCC2516T
- Deffluvimonas sp. 20V17
- Omnibacter recondiphilus DSM 15620T
- Pseudorhodobacter ferrugineus DSM 5888T
- Rhodobacter sp. CACIA14H1
- Rhodobacter sp. SW2
- Rhodobacter sphaeroides ATCC 17025
- Rhodobacter sphaeroides 2.4.1T
- Rhodobacter sphaeroides WS8N
- Rhodobacter sphaeroides ATCC 17029
- Rhodobacter sphaeroides KDL31
- Rhodobacter sp. AKP1
- Rhodobacter capsulatus YW1
- Rhodobacter capsulatus B6
- Rhodobacter capsulatus YW2
- Rhodobacter capsulatus SB1003
- Rhodobacter capsulatus DE442
- Rhodobacter capsulatus R121
- Rhodobacter capsulatus Y262
- Paracoccus zeaxanthinifaciens R-1512T (ATCC 21588T)
- Paracoccus aminophilus JCM17686T
- Paracoccus yeei ATCC BAA-599T
- Paracoccus denitrificans SD1
- Paracoccus sp. N5
- Paracoccus sp. TRP
- Paracoccus denitrificans PD1222
- Paracoccus pantotrophus J46
- Paracoccus pantotrophus J40
- Paracoccus sp. 155
- Paracoccus sp. J4
- Paracoccus sp. J39

## O. Corrected affiliations of strains to *Rhodobacteraceae* species and genera as inferred from their genomes

Our and previous analyses (Newton et al. 2010; Luo and Moran 2014) show that several genera of the Roseobacter group are not monophyletic, such as *Oceanicola*, which is spread over clades 1 and 3, and is not supported by 16S rRNA gene analysis either (Breider et al. 2014). This finding calls for the reclassification of the affected species. Suggestion for revised names of several strains are given here. Species affiliations have also to be corrected in some instances such as *Rhodobacterales* bacterium Y4I, for which digital DNA:DNA hybridization clearly shows that it is a *Leisingera daeponensis* strain.

All pairwise intergenomic distances between the genome sequences of the 132 strains were calculated using GBDP's latest version (Meier-Kolthoff et al. 2013). Under the established (Meier-Kolthoff et al. 2013) species delimitation thresholds, corresponding to 70 % DDH, the strains affiliation to known type strains was assessed. Recommendations for the renaming of incorrectly identified strains are given in the below table. Note that the maximum subtree height (Scheuner et al. 2014) was observed for the genus *Rubellimicrobium* (*R. thermophilum* DSM 16684<sup>T</sup> and *R. mesophilum* DSM 19309<sup>T</sup>).

| Current name                                      | Recommended renaming               | Comment                                                                                                                                                                                                                                                                                                                                                                    |
|---------------------------------------------------|------------------------------------|----------------------------------------------------------------------------------------------------------------------------------------------------------------------------------------------------------------------------------------------------------------------------------------------------------------------------------------------------------------------------|
| <i>Citreicella</i> sp. SE45                       | <i>Pelagibaca</i> sp. SE45         | height of the subtree is smaller than the maximum subtree height of established genera                                                                                                                                                                                                                                                                                     |
| <i>Citreicella</i> sp. 357                        | <i>Pelagibaca</i> sp. 357          | height of the subtree is smaller than the maximum subtree height of established genera                                                                                                                                                                                                                                                                                     |
| <i>Loktanella</i> strains                         | [None, reclassification necessary] | <i>Loktanellas</i> is found to be non-monophyletic; <i>L. salsilacus</i> is type species, but not included in the analyses; thus either <i>L. cinnabarina</i> LL-001 <sup>T</sup> and <i>L. hongkongensis</i> DSM 17492 <sup>T</sup> or <i>L. vestfoldensis</i> DSM 16212 <sup>T</sup> , <i>L. vestfoldensis</i> SKA53 and <i>L. sp.</i> SE62 should be put in a new genus |
| <i>Oceanicola batsensis</i> HTCC2597 <sup>T</sup> | [None, reclassification necessary] | <i>Oceanicola</i> is found to be non-monophyletic; <i>O. granulosis</i> is type species;                                                                                                                                                                                                                                                                                   |

|                                       |                                         |                                                                                                                        |
|---------------------------------------|-----------------------------------------|------------------------------------------------------------------------------------------------------------------------|
|                                       |                                         | thus <i>O. batsensis</i> should be put in a new genus                                                                  |
| <i>Oceanicola</i> sp. HL-35           | <i>Sediminimonas</i> sp. HL-35          | height of the subtree is smaller than the maximum subtree height of established genera                                 |
| <i>Oceanicola</i> sp. S124            | [None]                                  | same genus as <i>O. batsensis</i>                                                                                      |
| <i>Phaeobacter gallaeciensis</i> ANG1 | <i>Leisingera</i> sp. ANG1              | < 70 % DDH, but clusters within strains of the genus <i>Leisingera</i>                                                 |
| <i>Rhodobacter capsulatus</i> SB1003  | <i>Rhodobacteraceae</i> gen. sp. SB1003 | height of the subtree is larger than the maximum subtree height of established genera                                  |
| <i>Rhodobacter</i> sp. AKP1           | <i>Rhodobacter sphaeroides</i> AKP1     | ≥ 70 % DDH to <i>Rhodobacter sphaeroides</i> 2.4.1 <sup>T</sup>                                                        |
| <i>Rhodobacter</i> sp. SW2            | <i>Pseudorhodobacter</i> sp. SW2        | height of the subtree is smaller than the maximum subtree height of established genera                                 |
| <i>Rhodobacterales</i> bacterium Y4I  | <i>Leisingera daeponensis</i> Y4I       | ≥ 70 % DDH to <i>Leisingera daeponensis</i> TF-218 <sup>T</sup>                                                        |
| <i>Roseobacter</i> sp. AzwK-3b        | <i>Roseovarius</i> sp. AzwK-3b          | < 70 % DDH, but clusters within strains of the genus <i>Roseovarius</i>                                                |
| <i>Roseobacter</i> sp. CCS2           | <i>Loktanella</i> sp. CCS 2             | < 70 % DDH, but clusters within strains of the genus <i>Loktanella</i> ; see comment for the <i>Loktanella</i> strains |
| <i>Roseobacter</i> sp. GAI101         | <i>Rhodobacteraceae</i> gen. sp. GAI101 |                                                                                                                        |
| <i>Roseobacter</i> sp. LE17           | <i>Planktomarina tempera</i> LE17       | ≥ 70 % DDH to <i>Planktomarina tempera</i> RCA23 <sup>T</sup>                                                          |
| <i>Roseobacter</i> sp. MED193         | <i>Pseudophaeobacter</i> sp. MED193     |                                                                                                                        |

|                                  |                                               |  |
|----------------------------------|-----------------------------------------------|--|
| <i>Roseobacter</i> sp. R2A57     | <i>Rhodobacteraceae</i> gen. sp.<br>R2A57     |  |
| <i>Roseobacter</i> sp. SK209-2-6 | <i>Rhodobacteraceae</i> gen. sp.<br>SK209-2-6 |  |
| <i>Ruegeria mobilis</i> F1926    | <i>Rhodobacteraceae</i> gen. sp.<br>F1926     |  |
| <i>Ruegeria</i> sp. R11          | <i>Nautella italica</i> R11                   |  |
| <i>Ruegeria</i> sp. TM1040       | <i>Rhodobacteraceae</i> gen. sp.<br>TM1040    |  |
| <i>Ruegeria</i> sp. TrichCH4B    | <i>Rhodobacteraceae</i> gen. sp.<br>TrichCH4B |  |

## References

- Arunasri K, Venkata Ramana V, Spröer C, Sasikala C, Ramana C V. 2008. *Rhodobacter megalophilus* sp. nov., a phototroph from the Indian Himalayas possessing a wide temperature range for growth. *Int J Syst Evol Microbiol* 58: 1792–1796. doi:10.1099/ijs.0.65642-0.
- Breider S, Scheuner C, Schumann P, Fiebig A, Petersen J, Pradella S, Klenk HP, Brinkhoff T, Göker M. 2014. Genome-scale data suggest reclassifications in the Leisingera-Phaeobacter cluster including proposals for *Sedimentitalea* gen. nov. and *Pseudophaeobacter* gen. nov. *Front Microbiol.* 5:416.
- Choudhary M, Zanhua X, Fu YX, Kaplan S. 2007. Genome Analyses of Three Strains of *Rhodobacter sphaeroides*: Evidence of Rapid Evolution of Chromosome II. *J Bacteriol* 189: 1914–1921. doi:10.1128/JB.01498-06.
- Denner EBM, Kolari M, Hoornstra D, Tsitko I, Kämpfer P, et al. 2006. *Rubellimicrobium thermophilum* gen. nov., sp. nov., a red-pigmented, moderately thermophilic bacterium isolated from coloured slime deposits in paper machines. *Int J Syst Evol Microbiol* 56: 1355–1362. doi:10.1099/ijs.0.63751-0.
- Dogs M, Voget S, Teshima H, Petersen J, Davenport K, Dalingault H, Chen A, Pati A, Ivanova N, Goodwin LA et al. 2013. Genome sequence of *Phaeobacter inhibens* type strain (T5T), a secondary metabolite producing representative of the marine *Roseobacter* clade, and emendation of the species description of *Phaeobacter inhibens*. *Stand Genomic Sci.* 9:334–350.
- Donachie SP, Bowman JP, Alam M. 2006. *Nesiotobacter exalbescens* gen. nov., sp. nov., a moderately thermophilic alphaproteobacterium from an Hawaiian hypersaline lake. *Int J Syst Evol Microbiol* 56: 563–567. doi:10.1099/ijs.0.63440-0.
- Fiebig A, Riedel T, Gronow S, Petersen J, Klenk H-P, et al. 2013. Genome sequence of the reddish-pigmented *Rubellimicrobium thermophilum* type strain (DSM 16684T), a member of the *Rhodobacterales* clade. *Stand Genomic Sci* 8: 480–490. doi:10.4056/sigs.4247911.
- Frank O, Pradella S, Rohde M, Scheuner C, Klenk H-P, Göker M, Petersen J. 2014. Complete genome sequence of the *Phaeobacter gallaeciensis* type strain CIP 105210T (= DSM 26640T = BS107T). *Stand Genomic Sci.* 9: 914–932.
- Frank O, Göker M, Pradella S, Petersen J. 2015a. Ocean’s twelve: Flagellar and biofilm chromids in the multipartite genome of *Marinovum algicola* DG898 exemplify functional compartmentalization in Proteobacteria. *Environ Microbiol.* 17: 4019–4034.
- Harrison PW, Lower RPJ, Kim NKD, Young JPW. 2010. Introducing the bacterial “chromid”: Not a chromosome, not a plasmid. *Trends Microbiol.* 18:141–148.
- Kahle D, Wickham H. 2013. ggmap: Spatial Visualization with ggplot2. *The R Journal* 5:144–161.
- Lefort V, Desper R, Gascuel O. 2015. FastME 2.0: A comprehensive, accurate, and fast distance-based phylogeny inference program. *Mol Biol Evol* 2015 32: 2798–2800.
- Letunic I, Bork P. 2011. Interactive Tree Of Life v2: online annotation and display of phylogenetic trees made easy. *Nucleic Acids Res* 39: W475–W478. doi:10.1093/nar/gkr201.
- Lindemann SR, Moran JJ, Stegen JC, Renslow RS, Hutchison JR, et al. 2013. The epsomitic phototrophic microbial mat of Hot Lake, Washington: community structural responses to seasonal cycling. *Front Microbiol* 4: 323. doi:10.3389/fmicb.2013.00323.
- Lopez, R., Cowley, A., Li, W. and McWilliam, H. 2014. Using EMBL-EBI Services via Web Interface and Programmatically via Web Services. *Curr Protoc Bioinform* 48: 3.12.1-3.12.50.

doi:10.1002/0471250953.bi0312s48

Luo H, Moran MA. 2014. Evolutionary ecology of the marine *Roseobacter* clade. *Microbiol Mol Biol Rev.* 78:573–587.

Meier-Kolthoff JP, Auch AF, Klenk H-P, Göker M. 2013. Genome sequence-based species delimitation with confidence intervals and improved distance functions. *BMC Bioinformatics* 14: 60. doi:10.1186/1471-2105-14-60.

Meier-Kolthoff JP, Auch AF, Klenk H-P, Göker M. 2014. Highly parallelized inference of large genome-based phylogenies. *Concurr Comput Pract Exp* 26: 1715–1729. doi:10.1002/cpe.3112.

Newton RJ, Griffin LE, Bowles KM, Meile C, Gifford S, Givens CE, Howard EC, King E, Oakley CA, Reisch CR, et al. 2010. Genome characteristics of a generalist marine bacterial lineage. *ISME J.* 4:784–798.

Petersen J, Brinkmann H, Pradella S. 2009. Diversity and evolution of repABC type plasmids in Rhodobacterales. *Environ Microbiol.* 11:2627–2638.

Petersen J, Frank O, Göker M, Pradella S. 2013. Extrachromosomal, extraordinary and essential - The plasmids of the Roseobacter clade. *Appl Microbiol Biotechnol.* 97:2805–2815.

Pétursdóttir SK, Kristjánsson JK. 1997. *Silicibacter lacuscaerulensis* gen. nov., sp. nov., a mesophilic moderately halophilic bacterium characteristic of the Blue Lagoon geothermal lake in Iceland. *Extremophiles* 1: 94–99.

Scheuner C, Tindall BJ, Lu M, Nolan M, Lapidus A, et al. 2014. Complete genome sequence of *Planctomyces brasiliensis* type strain (DSM 5305<sup>T</sup>), phylogenomic analysis and reclassification of *Planctomycetes* including the descriptions of *Gimesia* gen. nov., *Planctopirus* gen. nov. and *Rubinisphaera* gen. nov. and emended descriptions of the order *Planctomycetales* and the family *Planctomycetaceae*. *Stand Genomic Sc* 9: 10. doi:10.1186/1944-3277-9-10.

Urbance JW, Bratina BJ, Stoddard SF, Schmidt TM. 2001. Taxonomic characterization of *Ketogulonigenium vulgare* gen. nov., sp. nov. and *Ketogulonigenium robustum* sp. nov., which oxidize L-sorbose to 2-keto-L-gulonic acid. *Int J Syst Evol Microbiol* 51: 1059–1070.

Venkata Ramana V, Sasikala C, Ramana C V. 2008. *Rhodobacter maris* sp. nov., a phototrophic alphaproteobacterium isolated from a marine habitat of India. *Int J Syst Evol Microbiol* 58: 1719–1722. doi:10.1099/ijs.0.65638-0.

Wang Y-X, Wang Z-G, Liu J-H, Chen Y-G, Zhang X-X, et al. 2009. *Sediminimonas qiaohouensis* gen. nov., sp. nov., a member of the Rhodobacterales clade in the order Rhodobacterales. *Int J Syst Evol Microbiol* 59: 1561–1567. doi:10.1099/ijs.0.006965-0.

Weon H-Y, Son J-A, Yoo S-H, Hong S-B, Jeon Y-A, et al. 2009. *Rubellimicrobium aerolatum* sp. nov., isolated from an air sample in Korea. *Int J Syst Evol Microbiol* 59: 406–410. doi:10.1099/ijs.0.65856-0.

## **Appendix**

Results of BLASTN searches against the EMBL em\_geo\_rel\_env environmental database. Each circle represents a the geographic location of a hit and is coloured according to the habitat assigned to the query as used in this study (blue: marine; red: non-marine/saline; grey: undefined). The labels associated with each hit provide information on the sampling site as included in the EMBL database.

*Oceanicola batsensis* HTCC2597T (DB ID: t\_1)

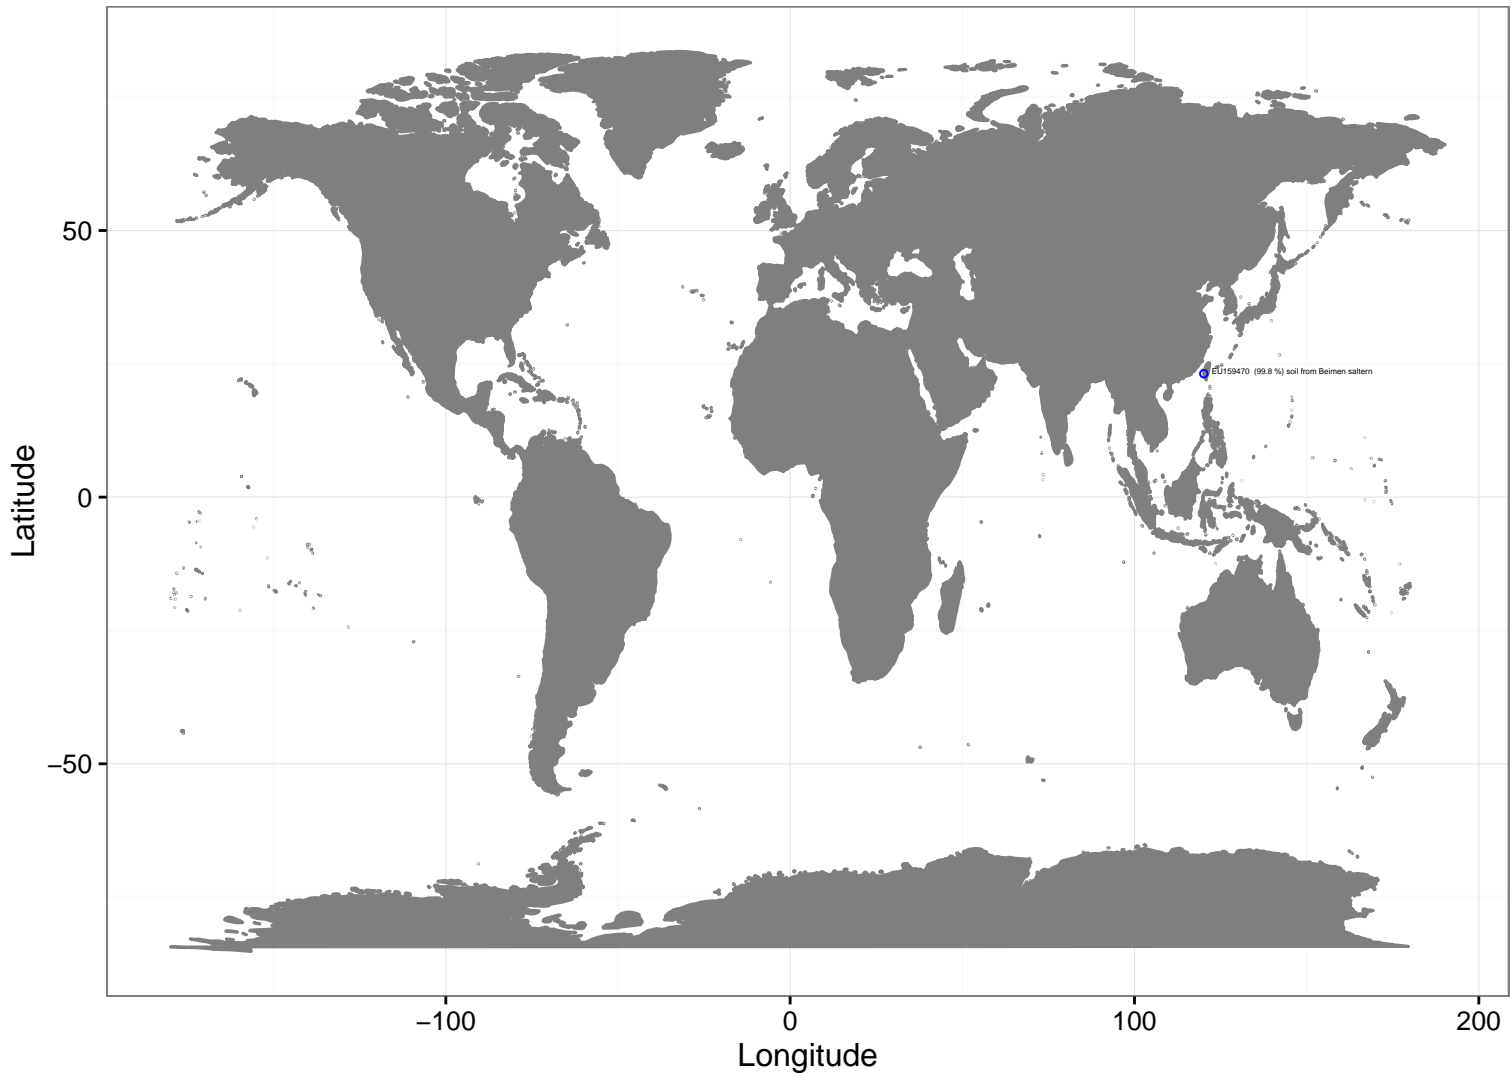



*Rhodobacter* sp. AKP1 (DB ID: t\_100)

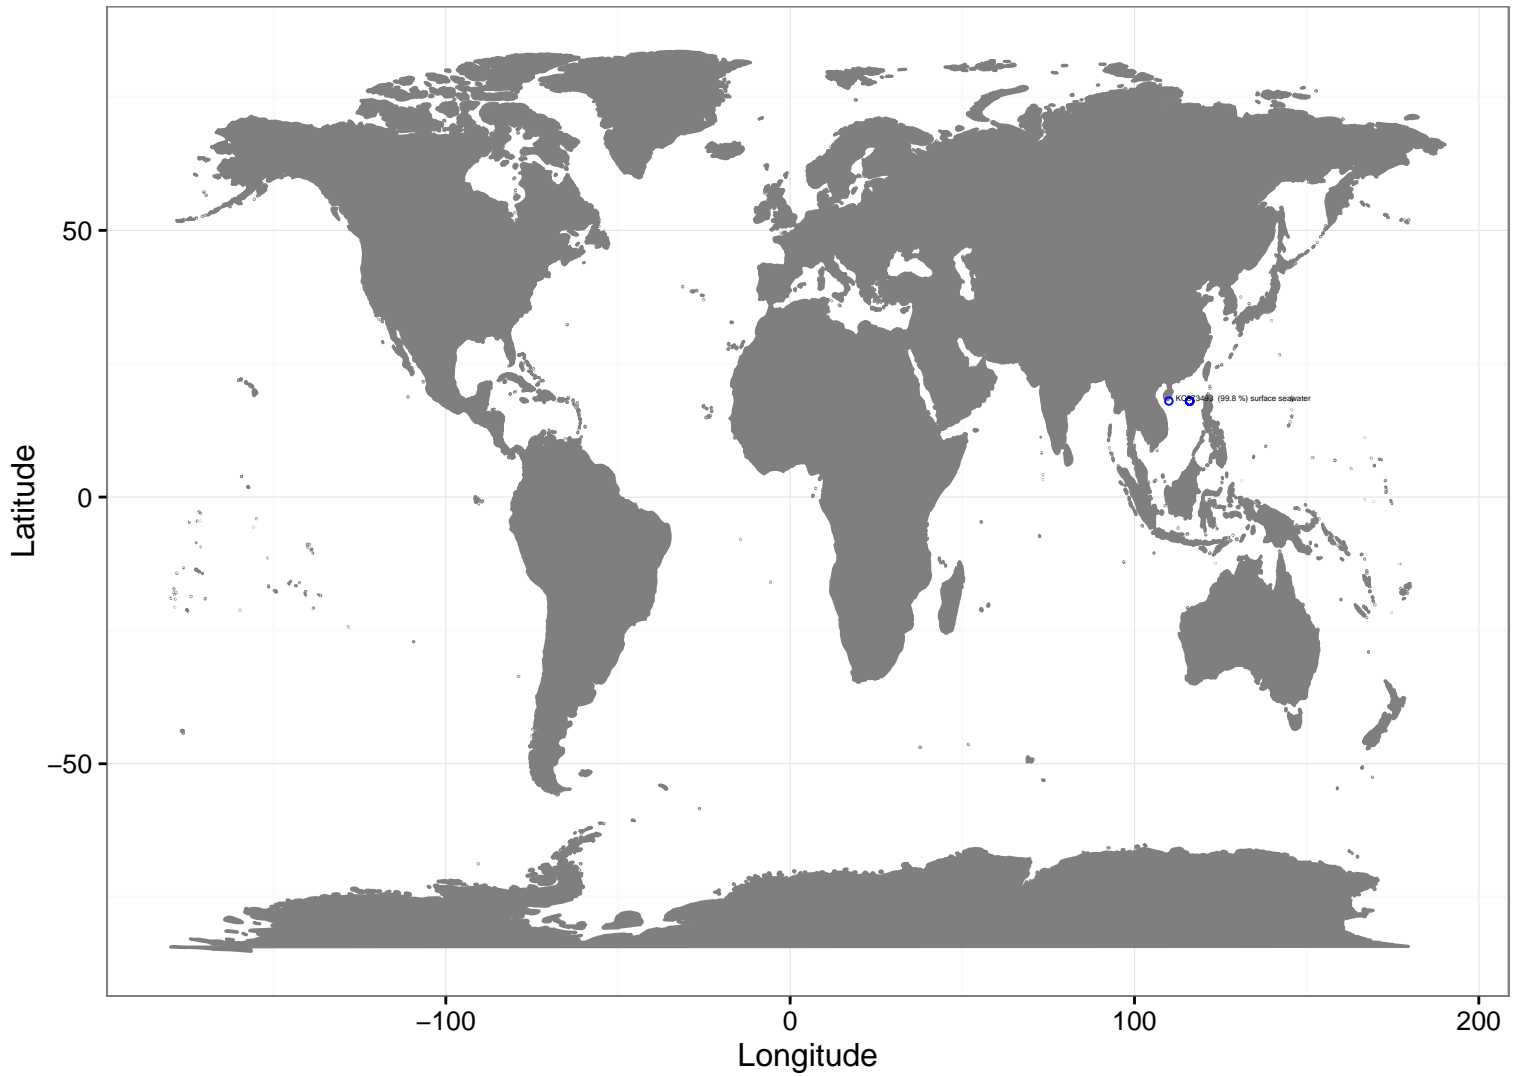

*Celeribacter baekdonensis* B30 (DB ID: t\_101 )

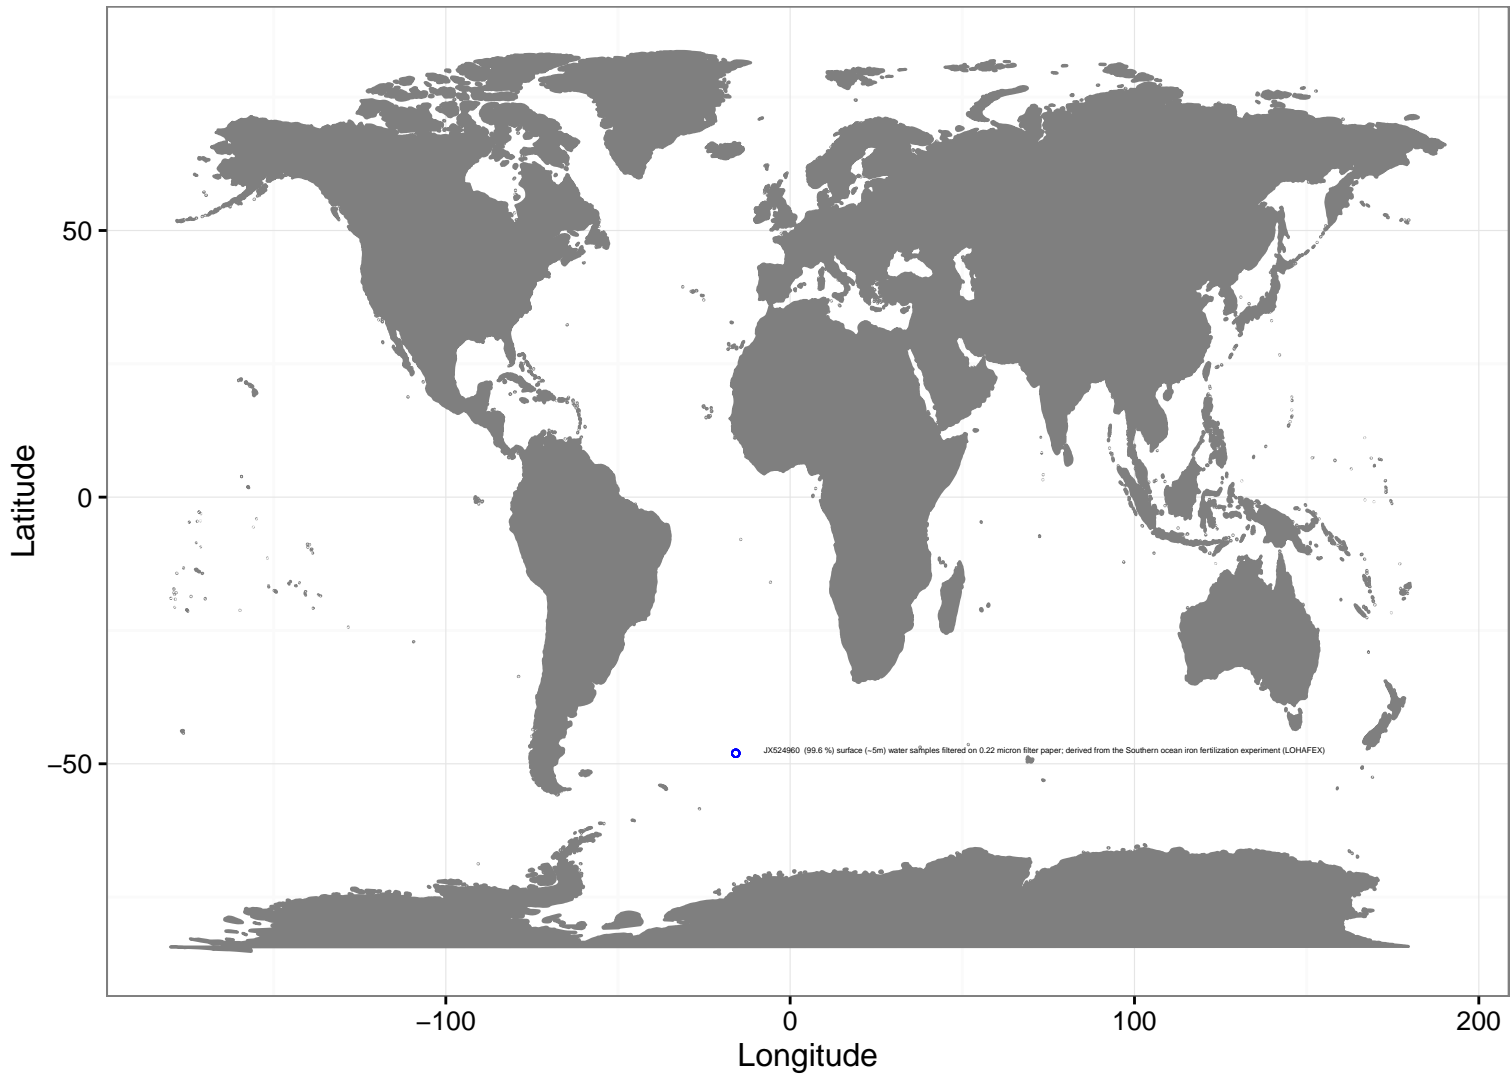

*Loktanella cinnabarina* LL-001T (DB ID: t\_108)

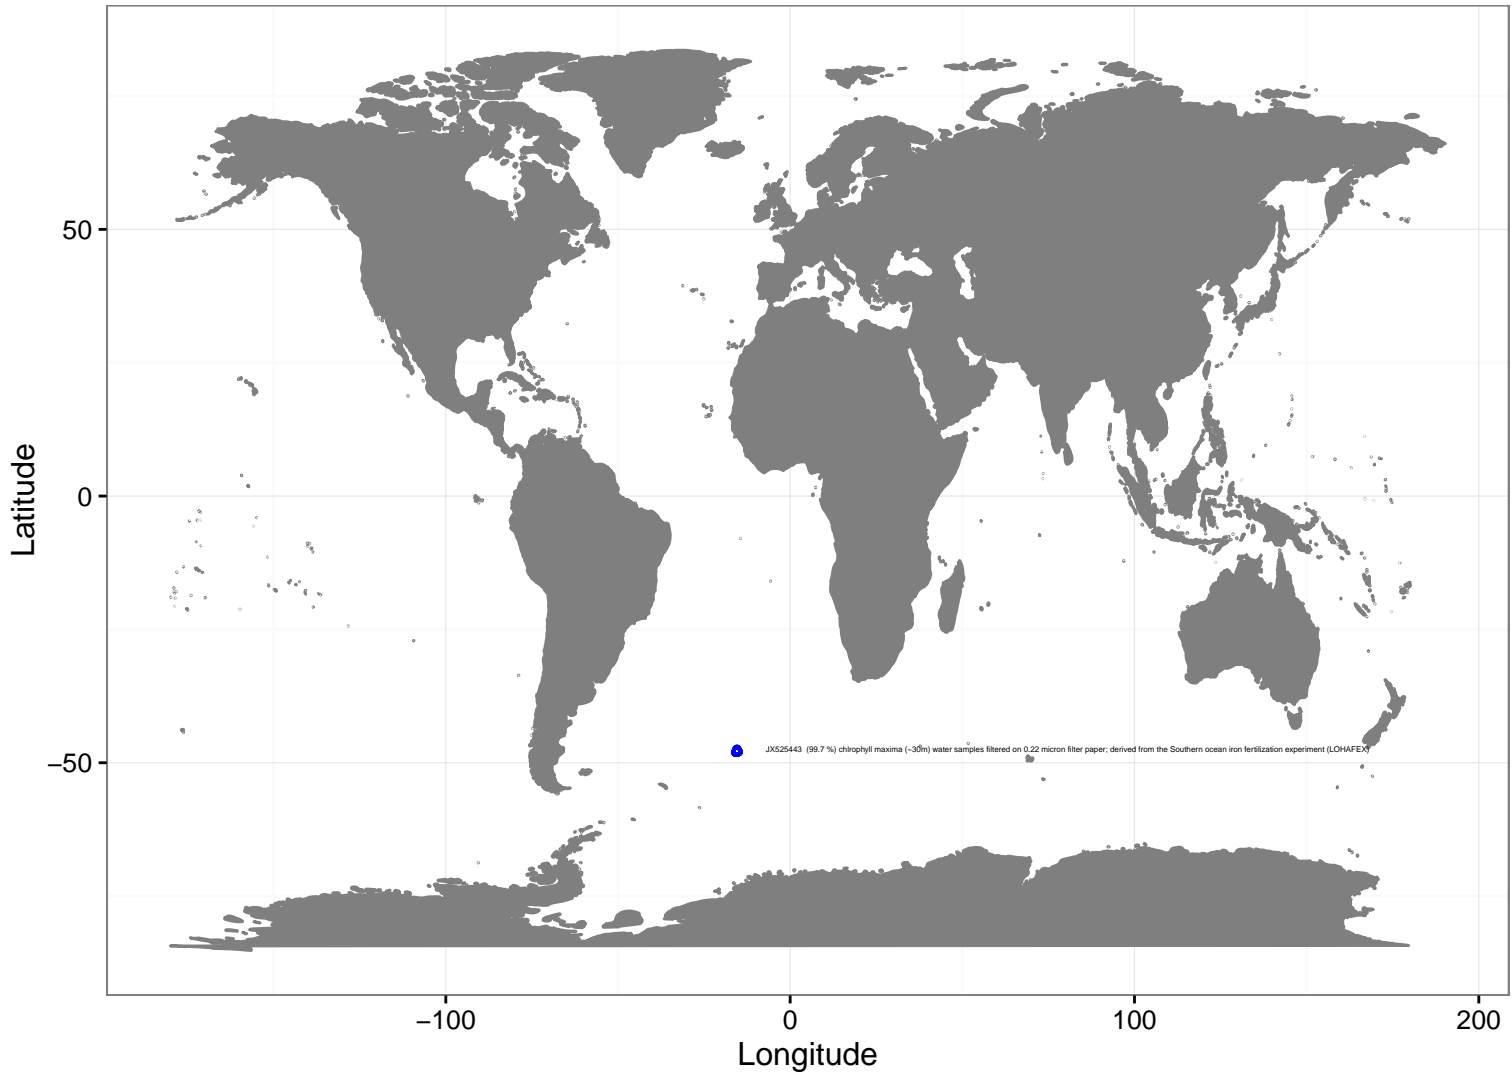

*Ruegeria mobilis* F1926 (DB ID: t\_110 )

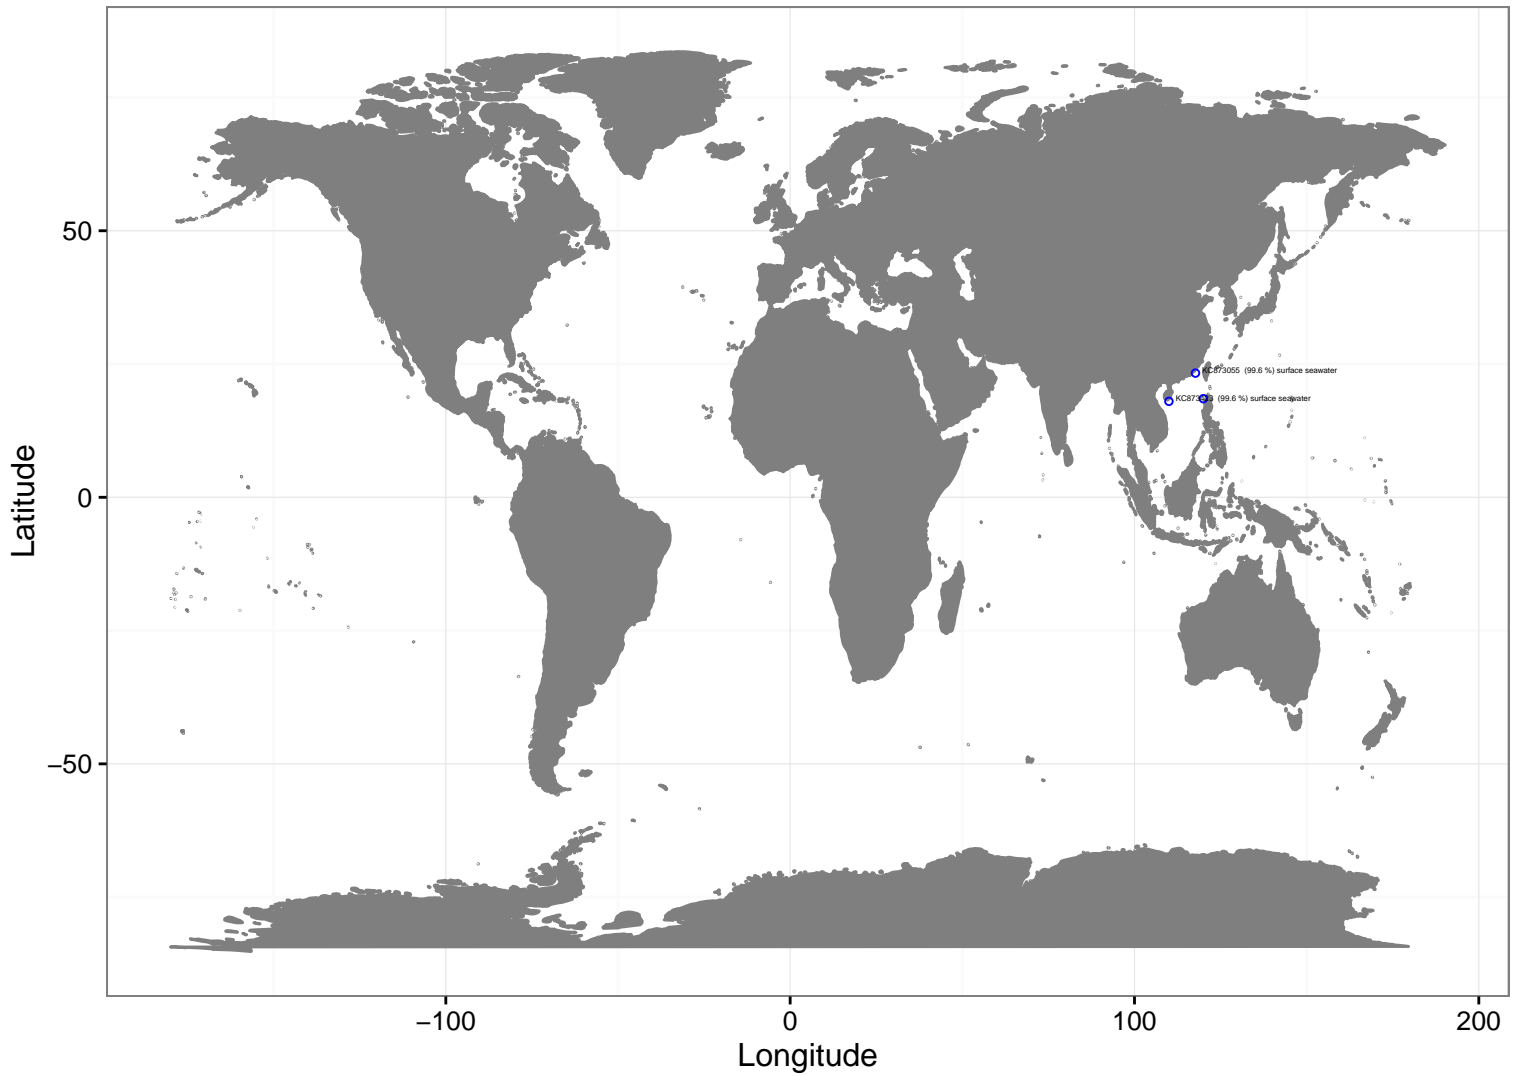

*Loktanella vestfoldensis* DSM 16212T (DB ID: t\_111)

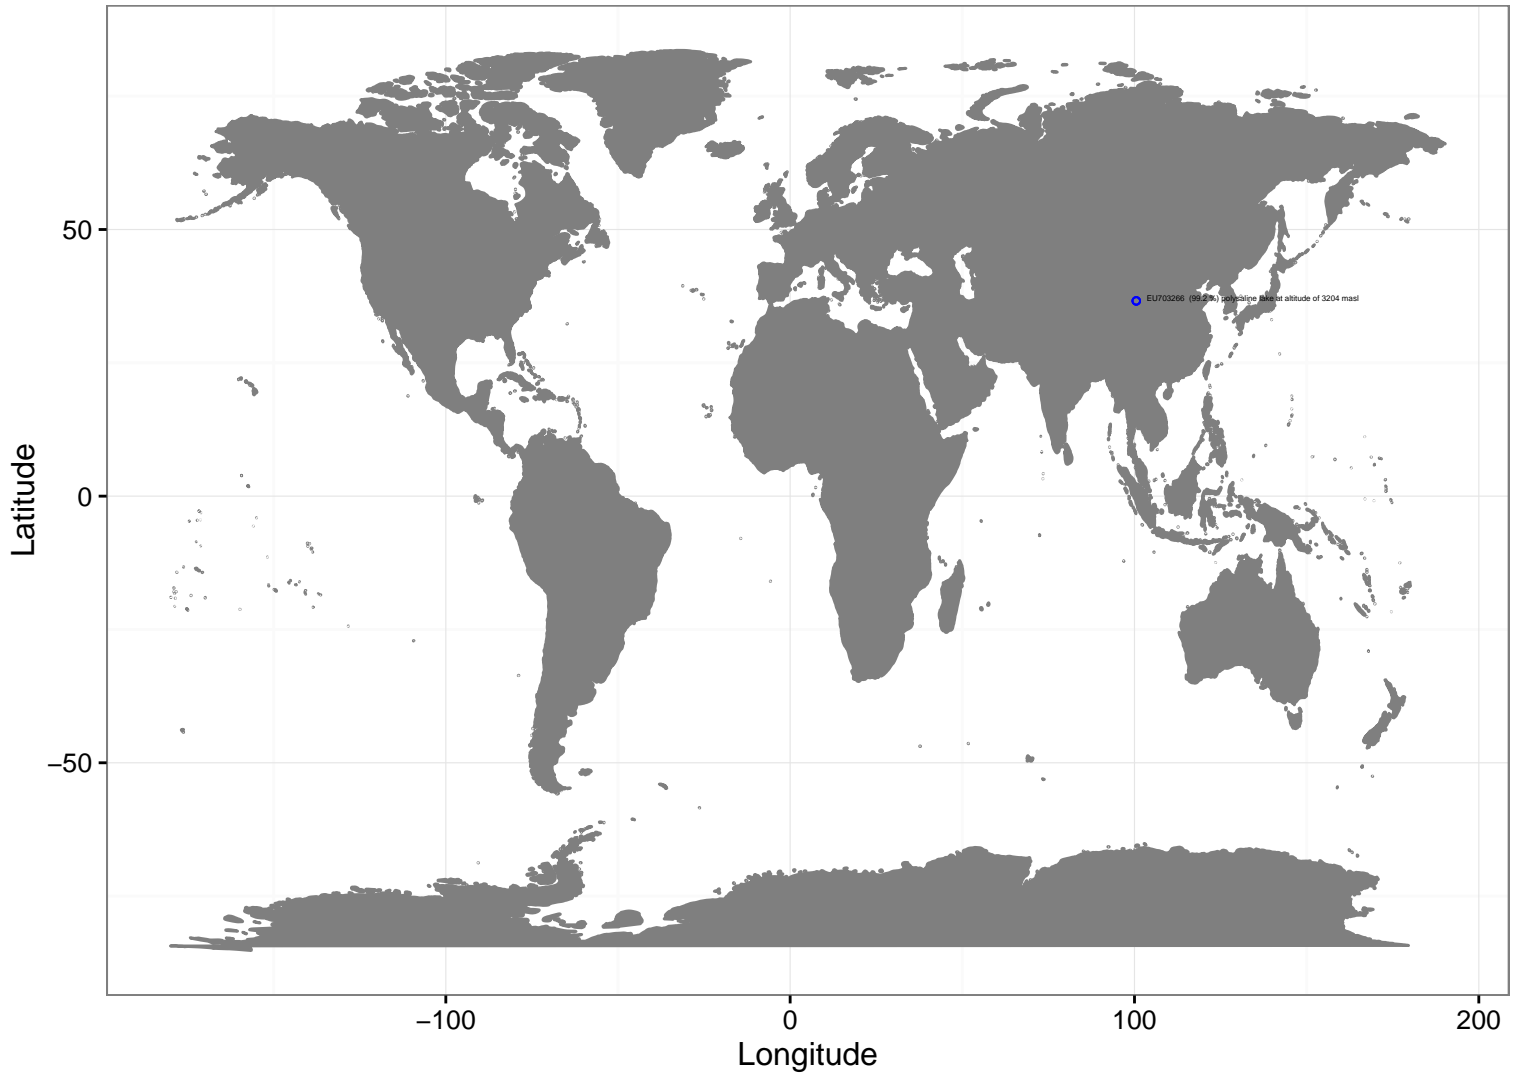

*Paracoccus pantotrophus* J40 (DB ID: t\_124 )

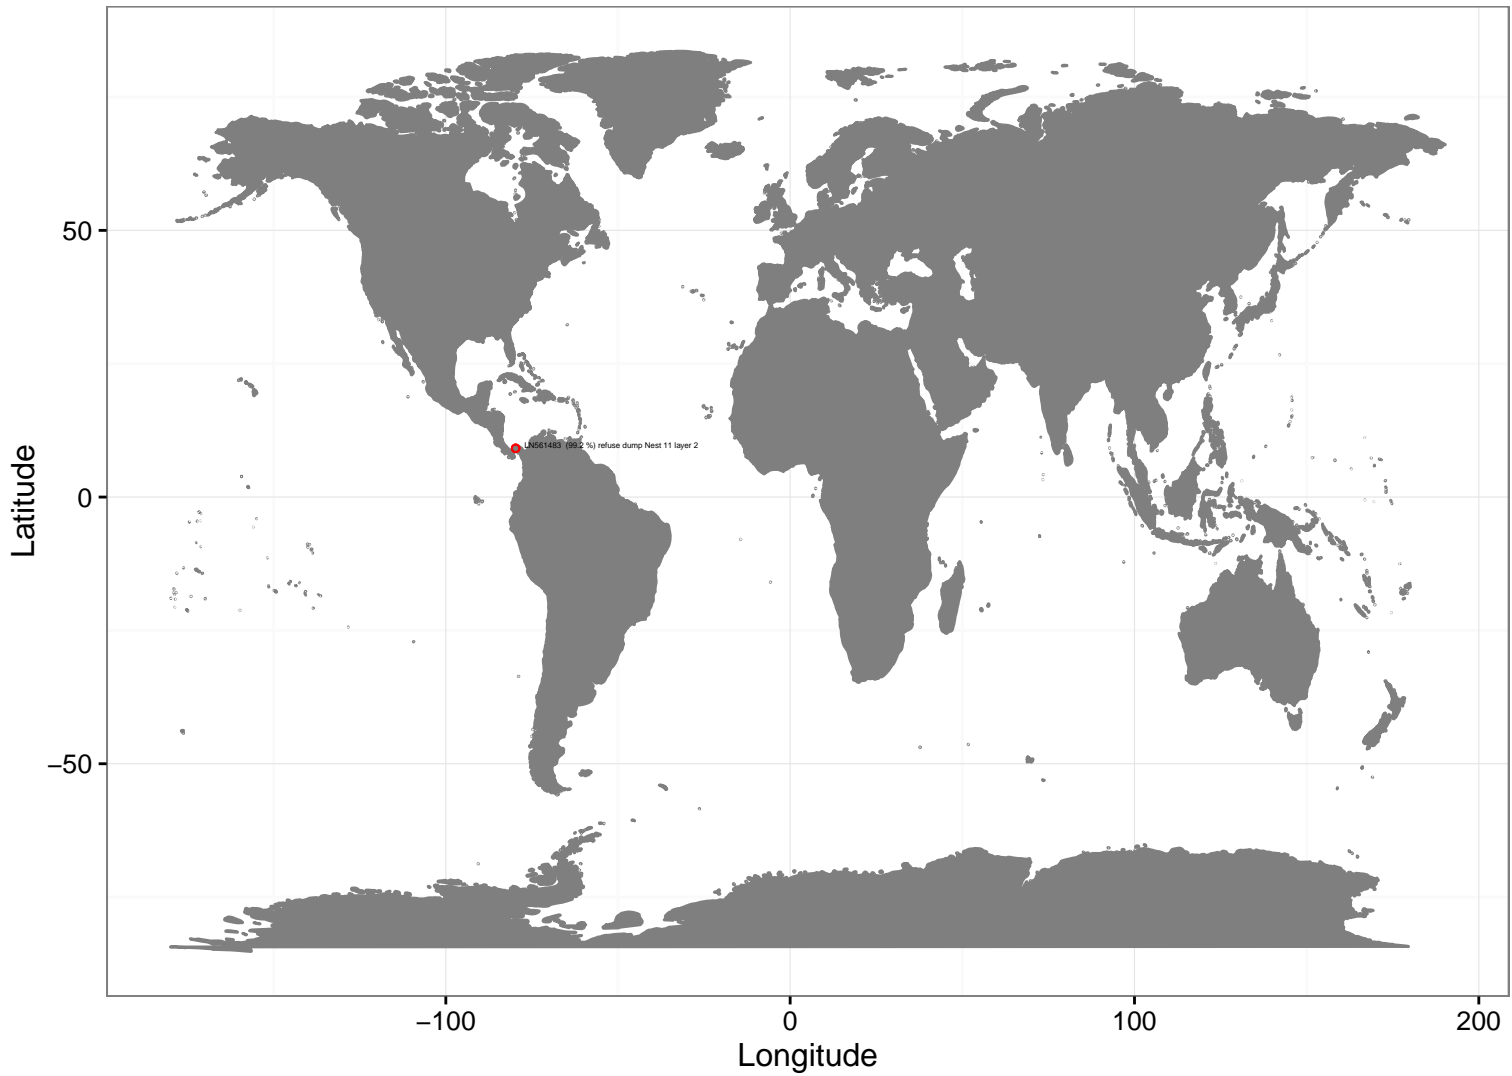

*Paracoccus pantotrophus* J46 (DB ID: t\_125 )

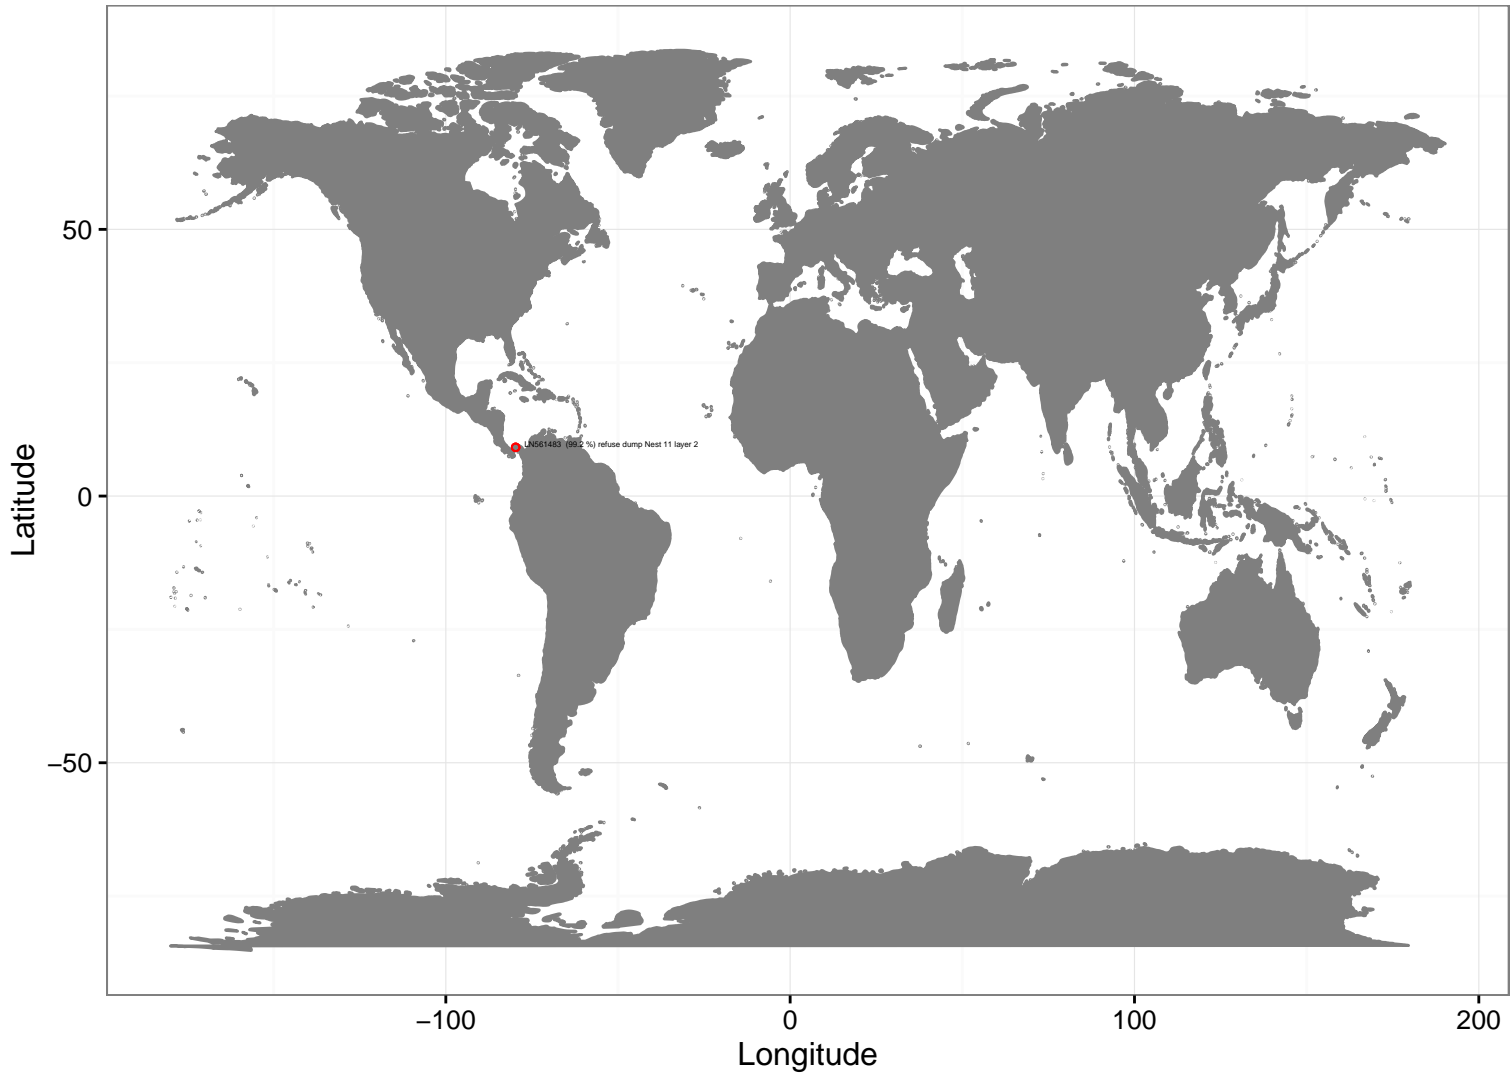

*Paracoccus* sp. J39 (DB ID: t\_126)

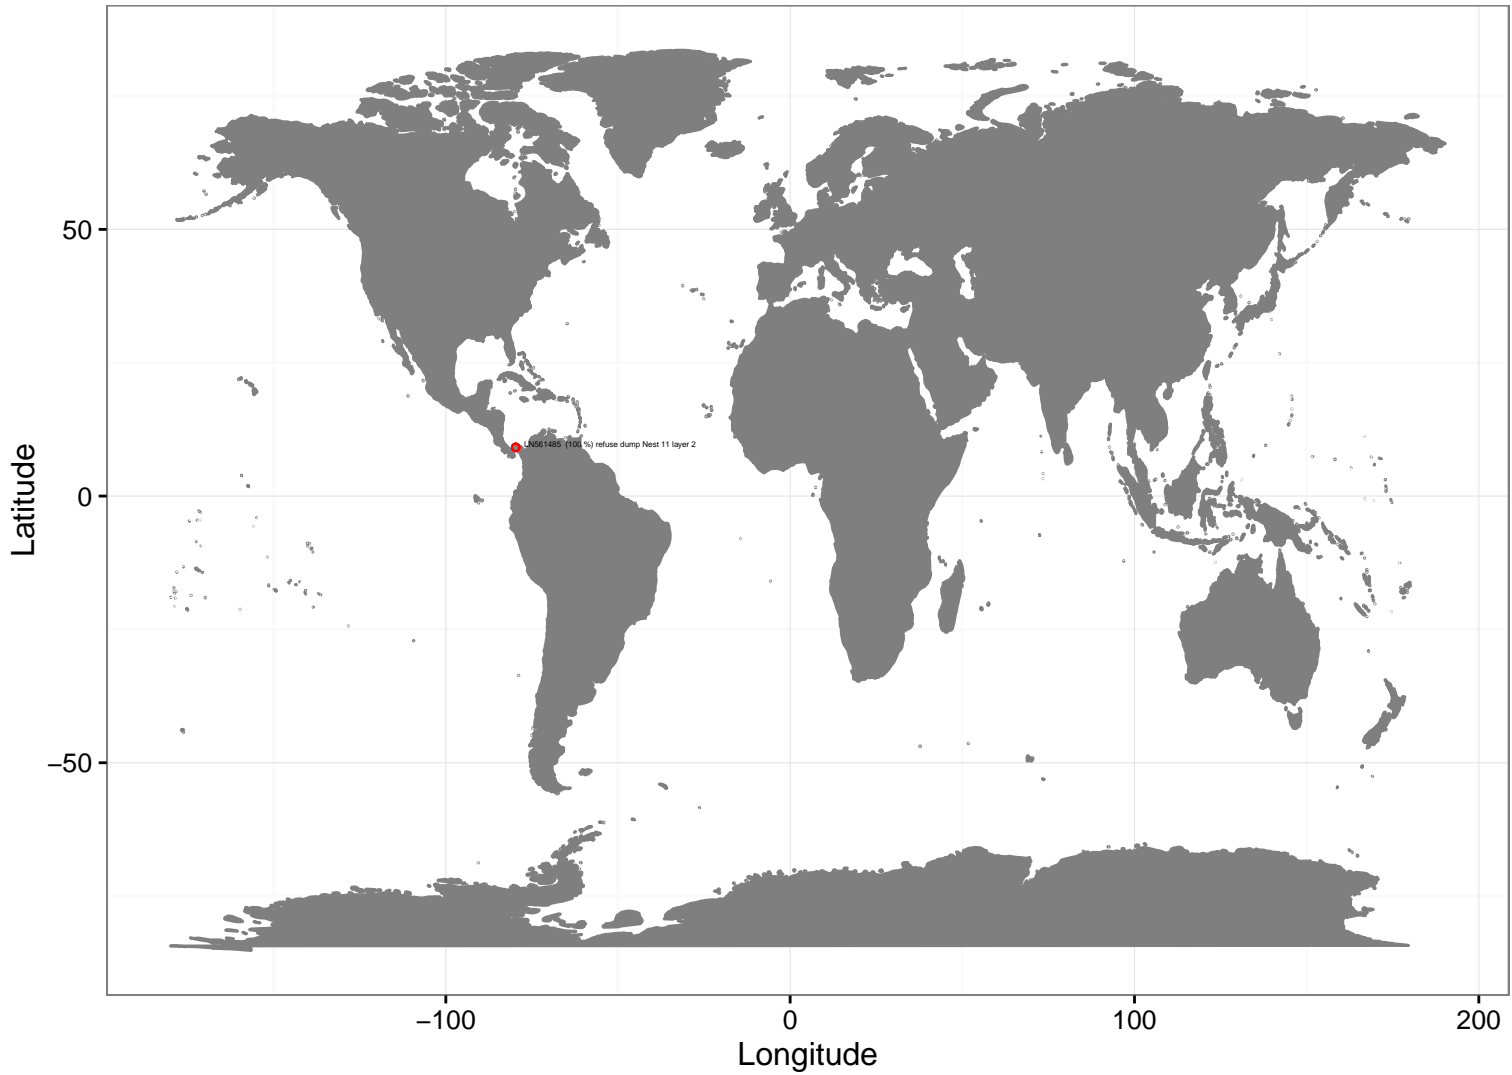



*Phaeobacter* sp. LSS9 (DB ID: t\_128)

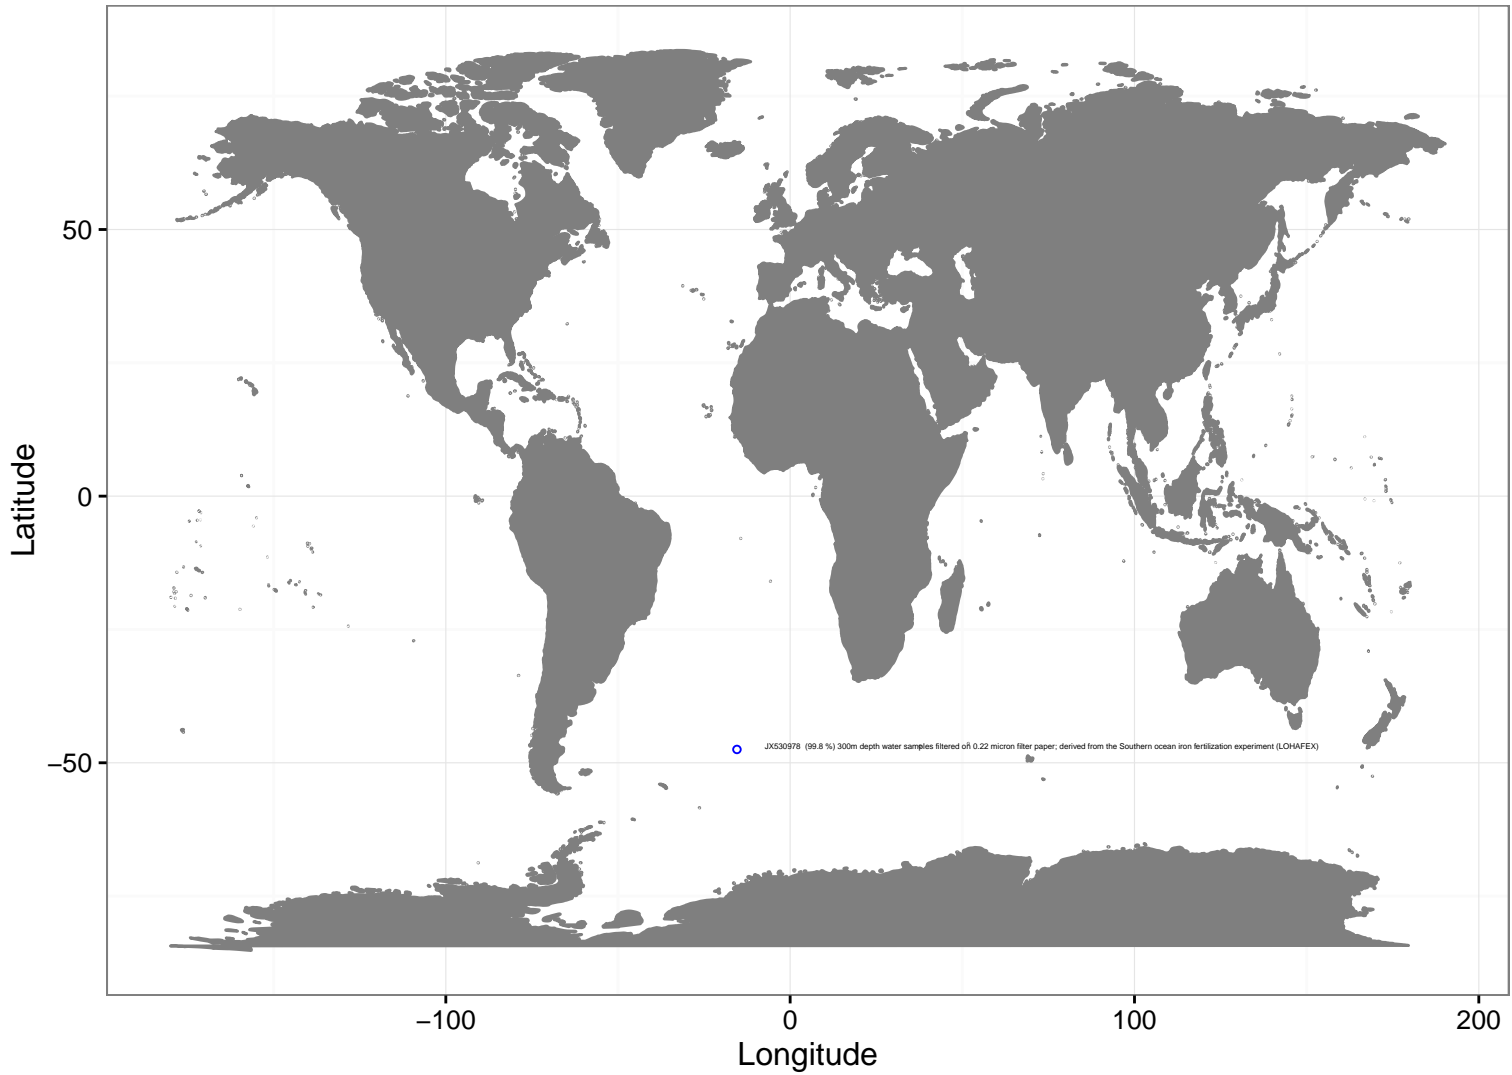

*Planktomarina temperata* RCA23T (DB ID: t\_131 )

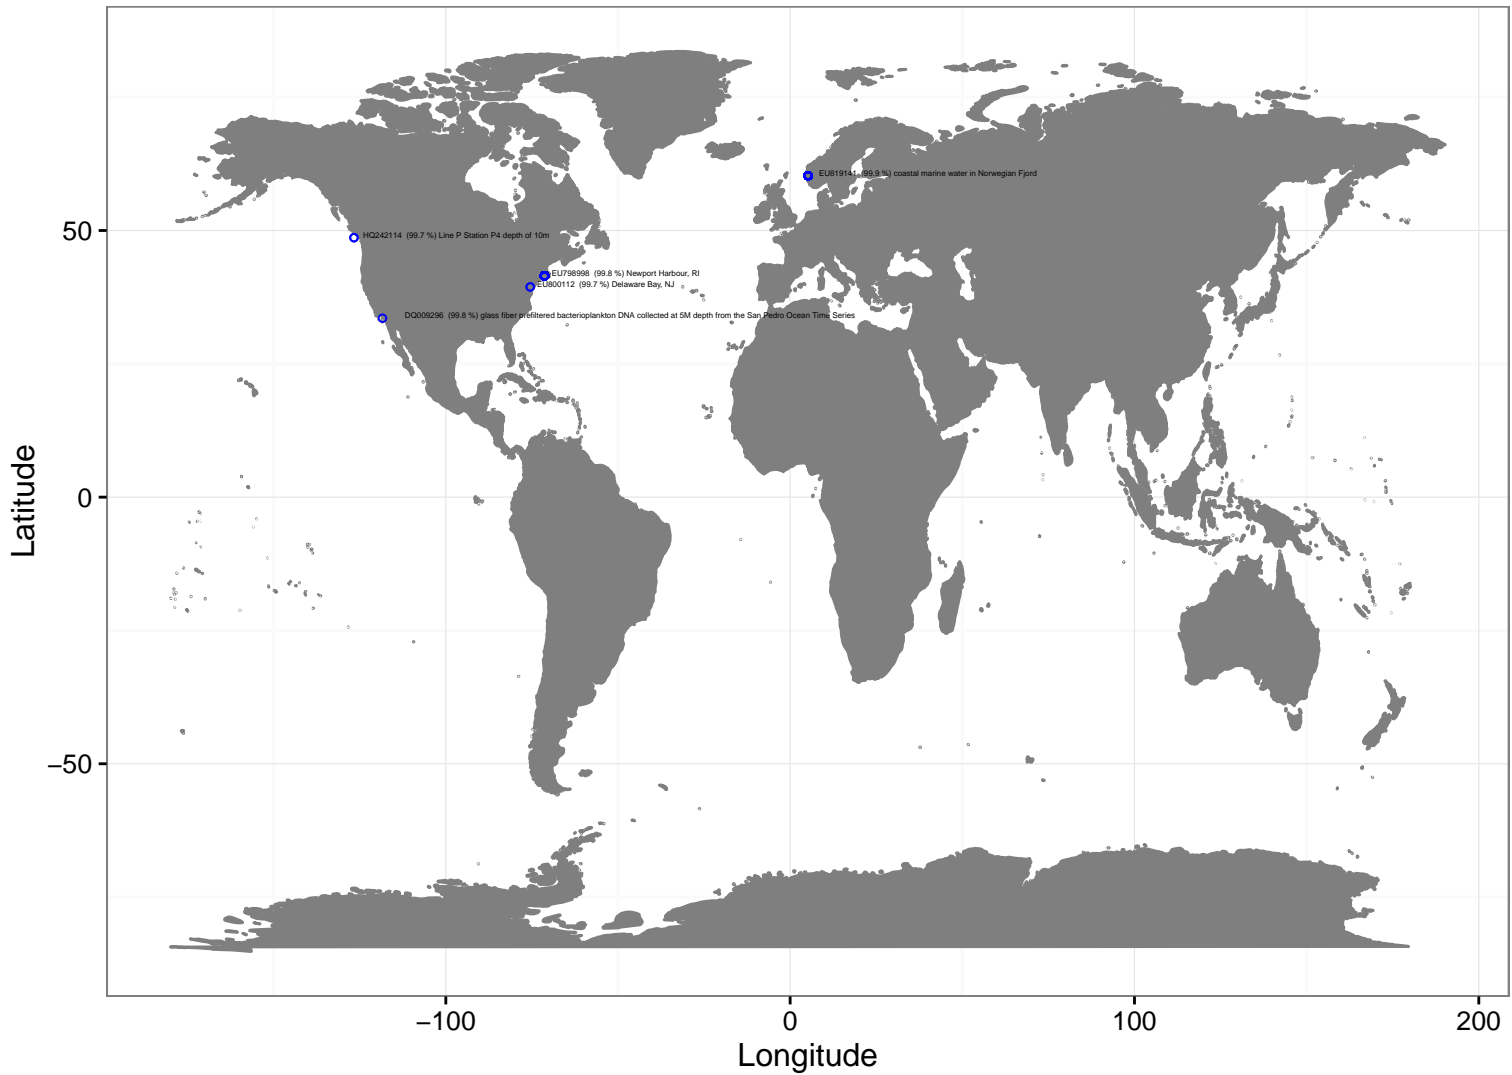

*Octadecabacter antarcticus* 307T (DB ID: t\_17 )

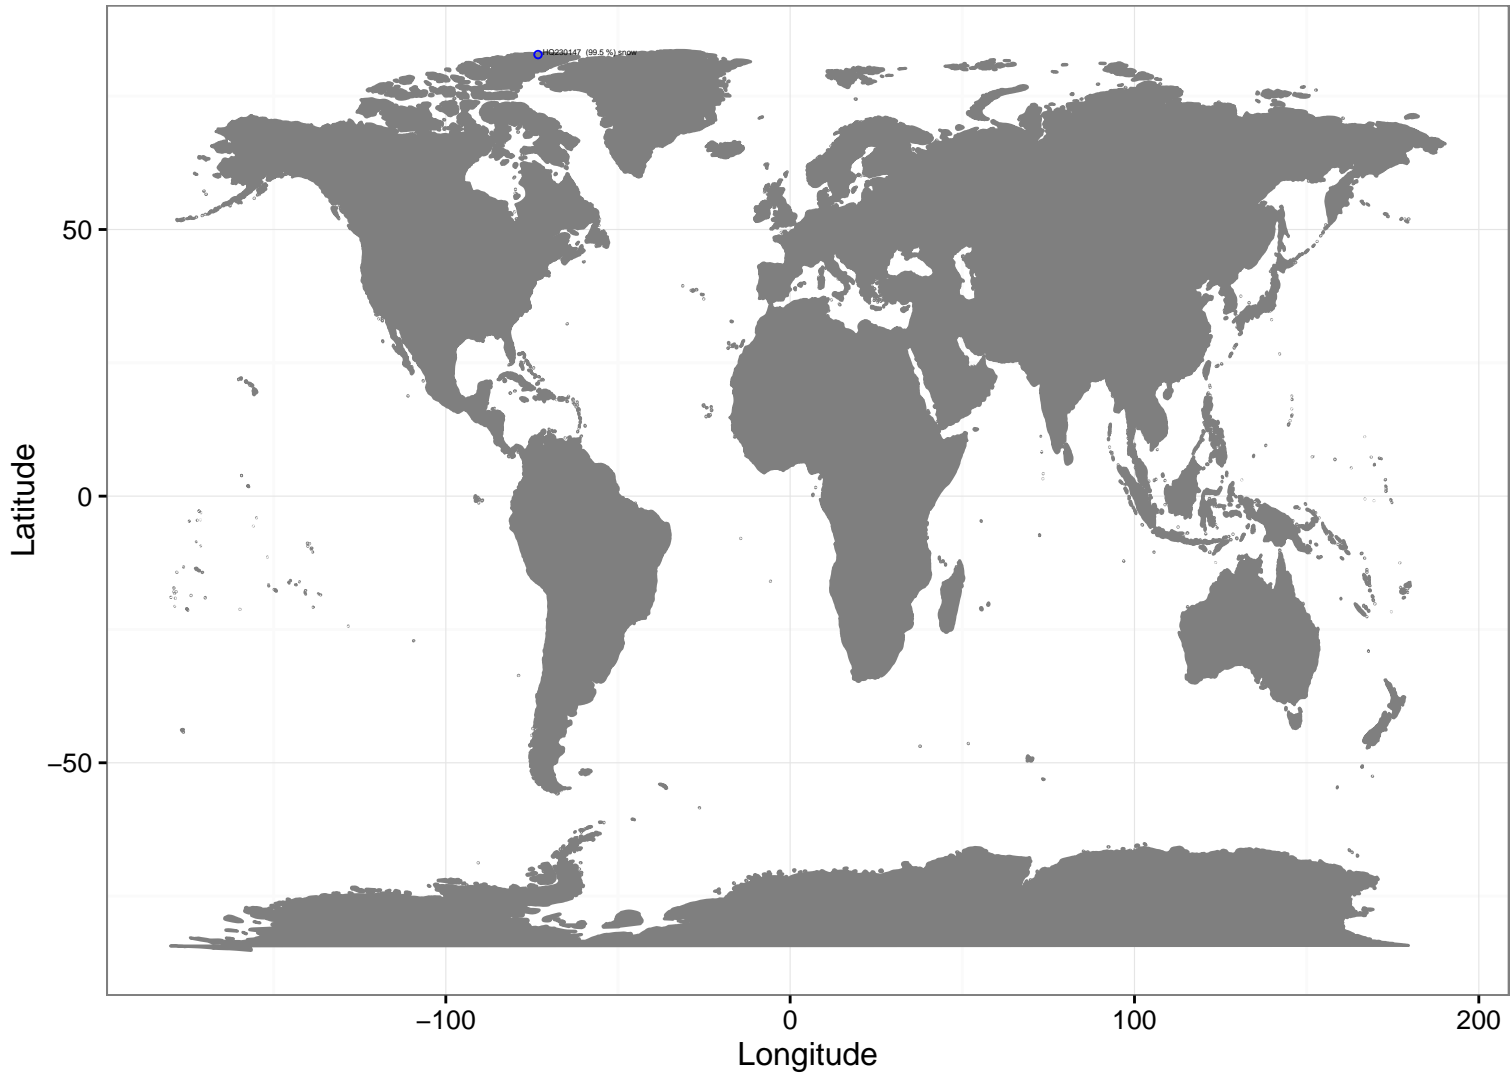

*Octadecabacter arcticus* 238T (DB ID: t\_18)

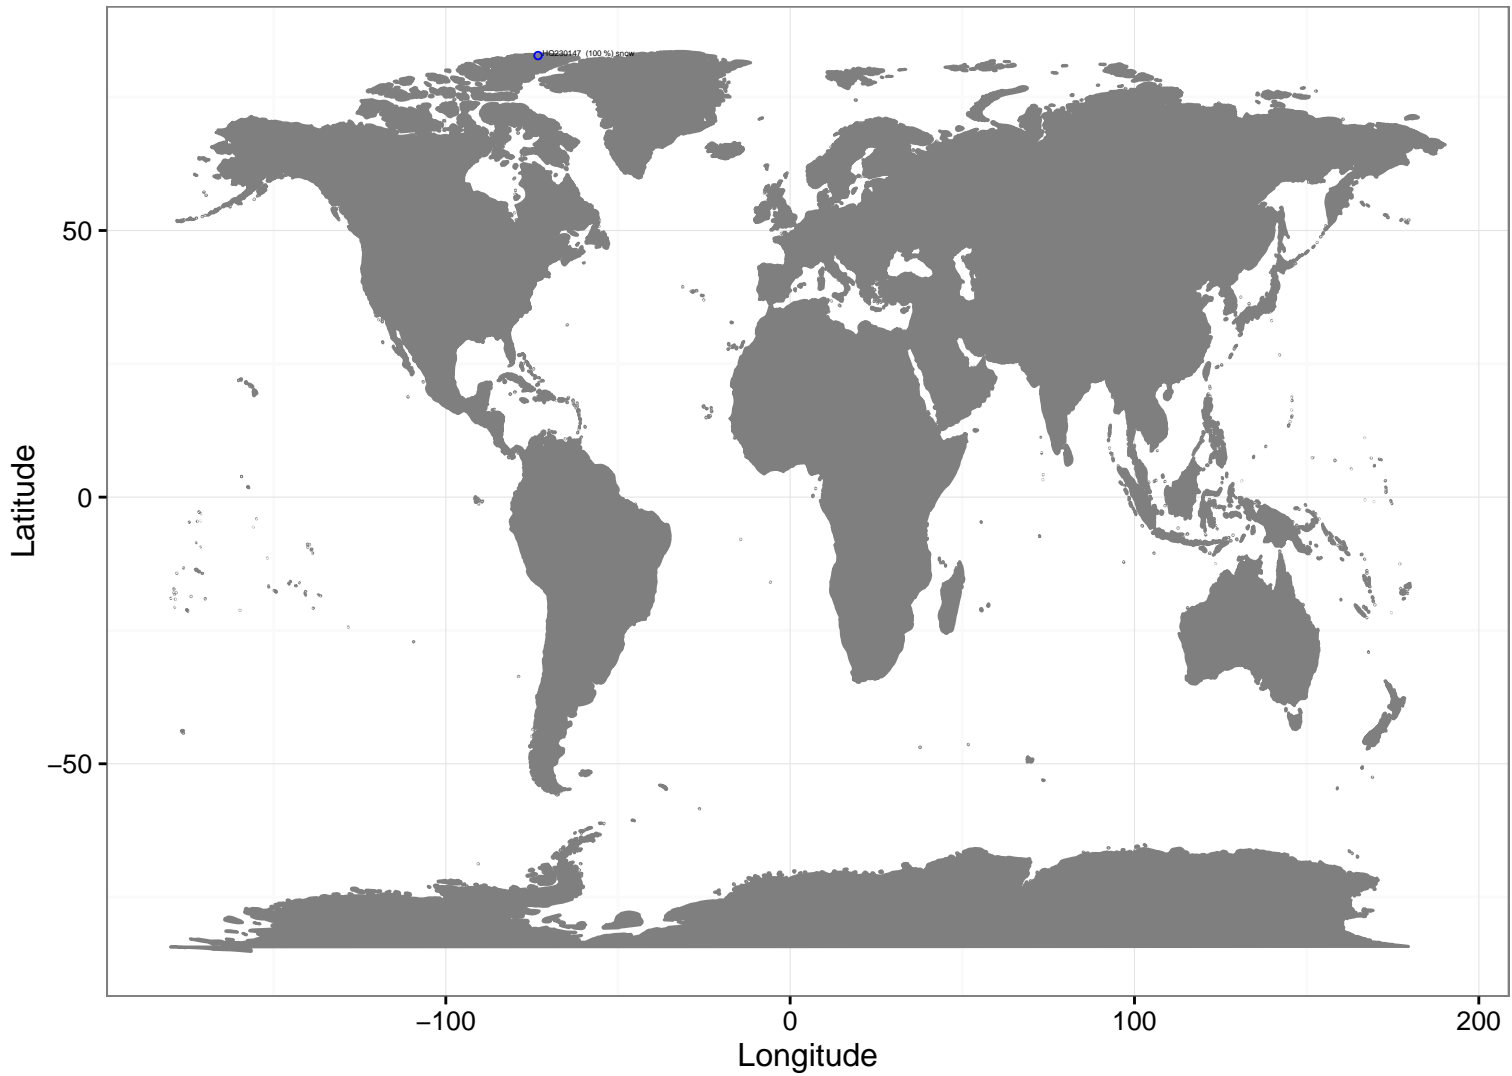

*Pseudophaeobacter arcticus* DSM 23566T (DB ID: t\_19)

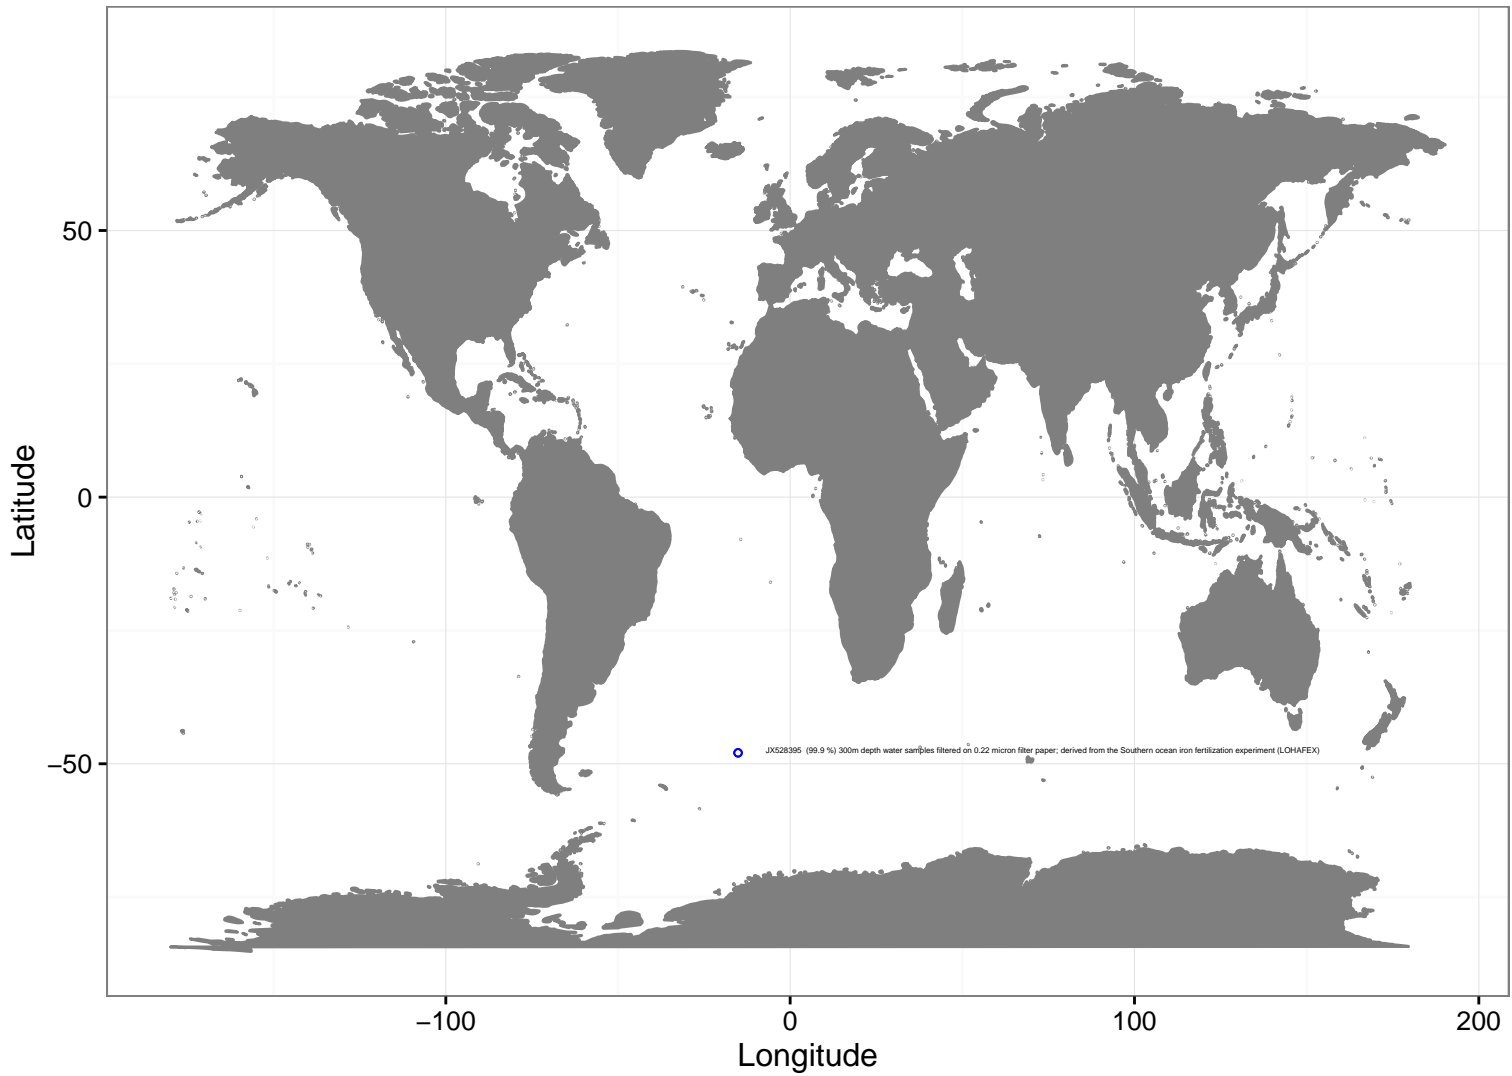

*Phaeobacter gallaeciensis* CIP105210T (DB ID: t\_22)

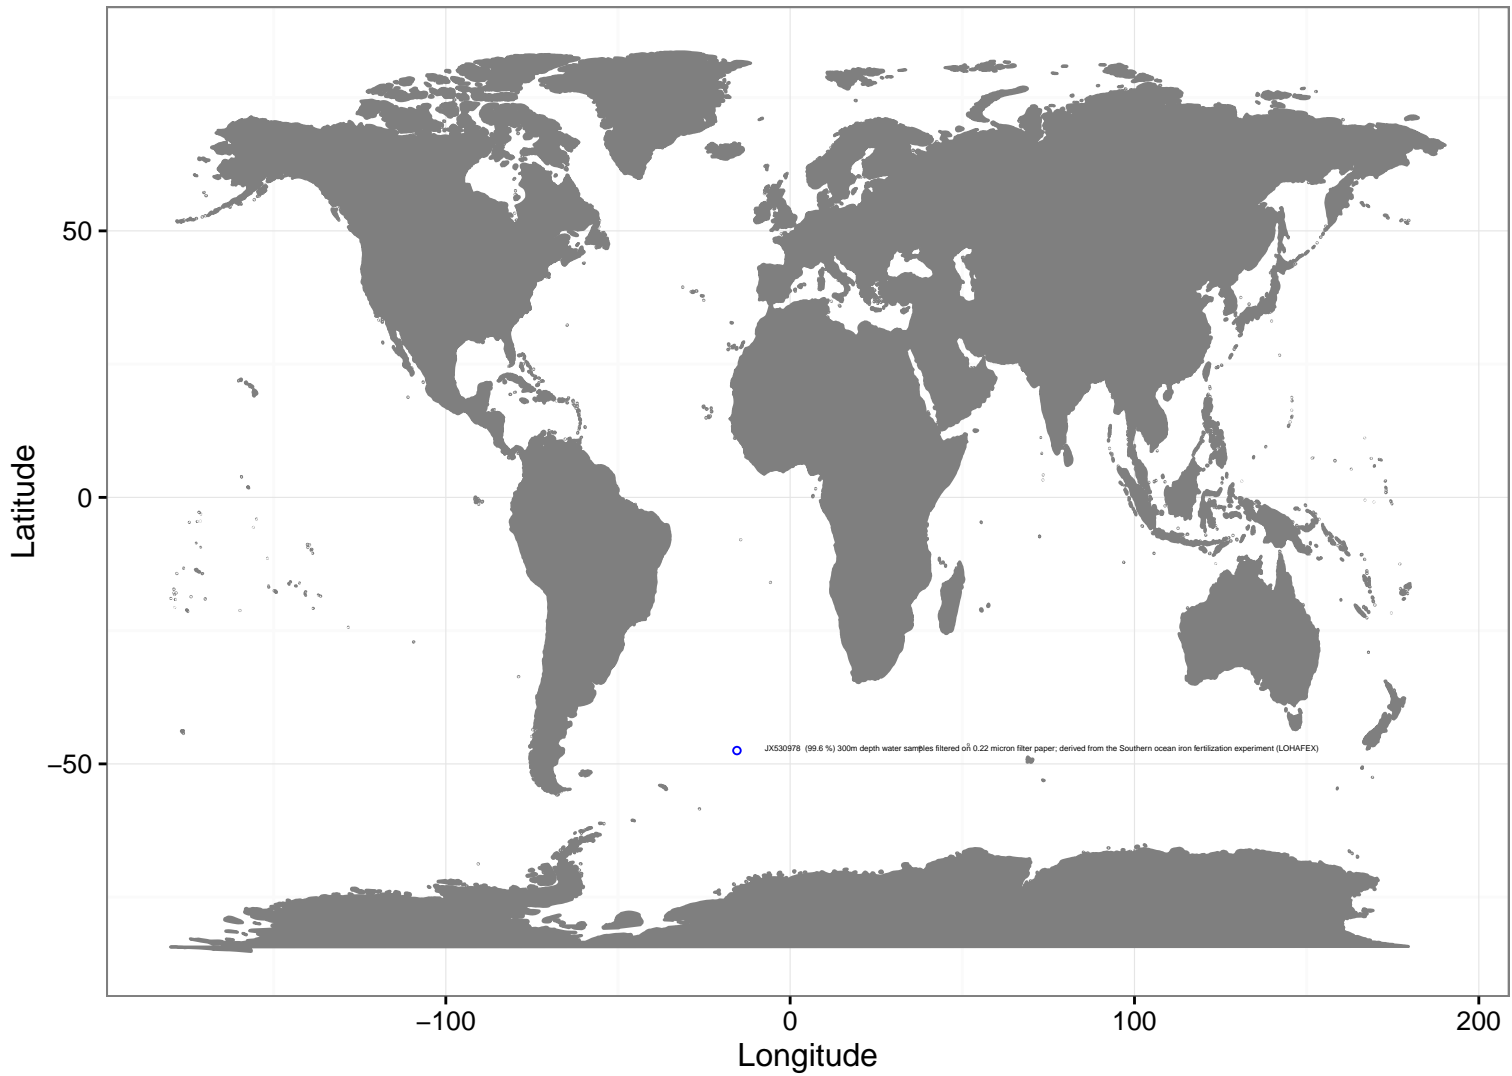

*Phaeobacter inhibens* T5T (DSM 16374T) (DB ID: t\_23)

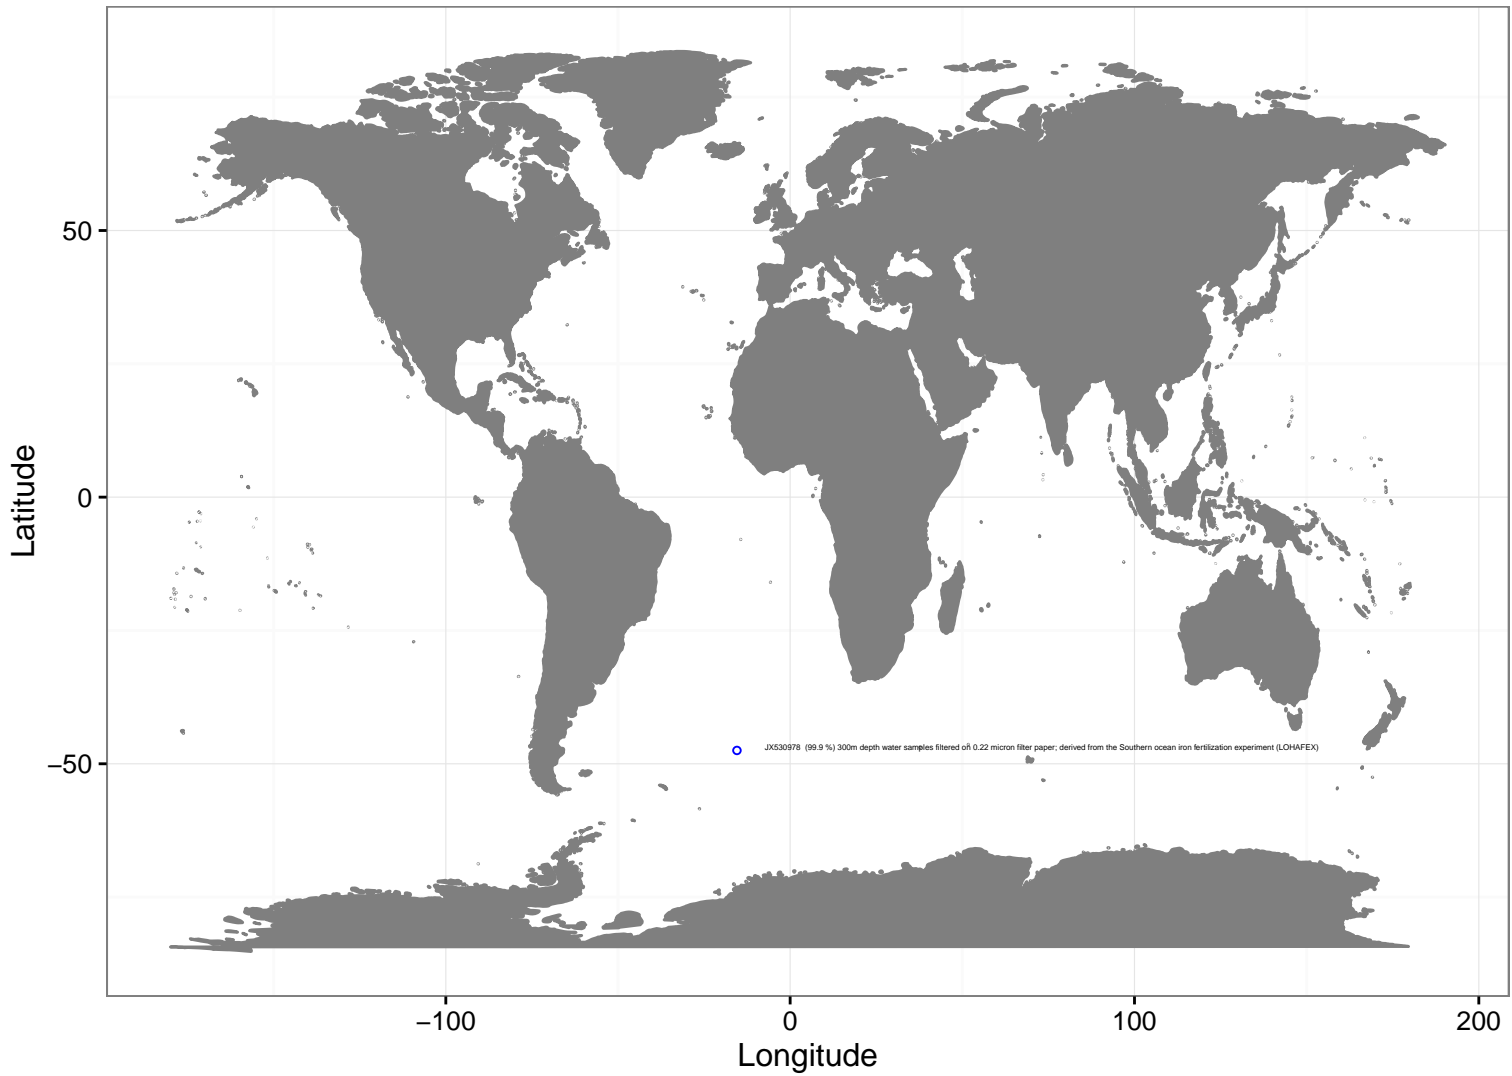

*Rhodobacter sphaeroides* 2.4.1T (DB ID: t\_24 )

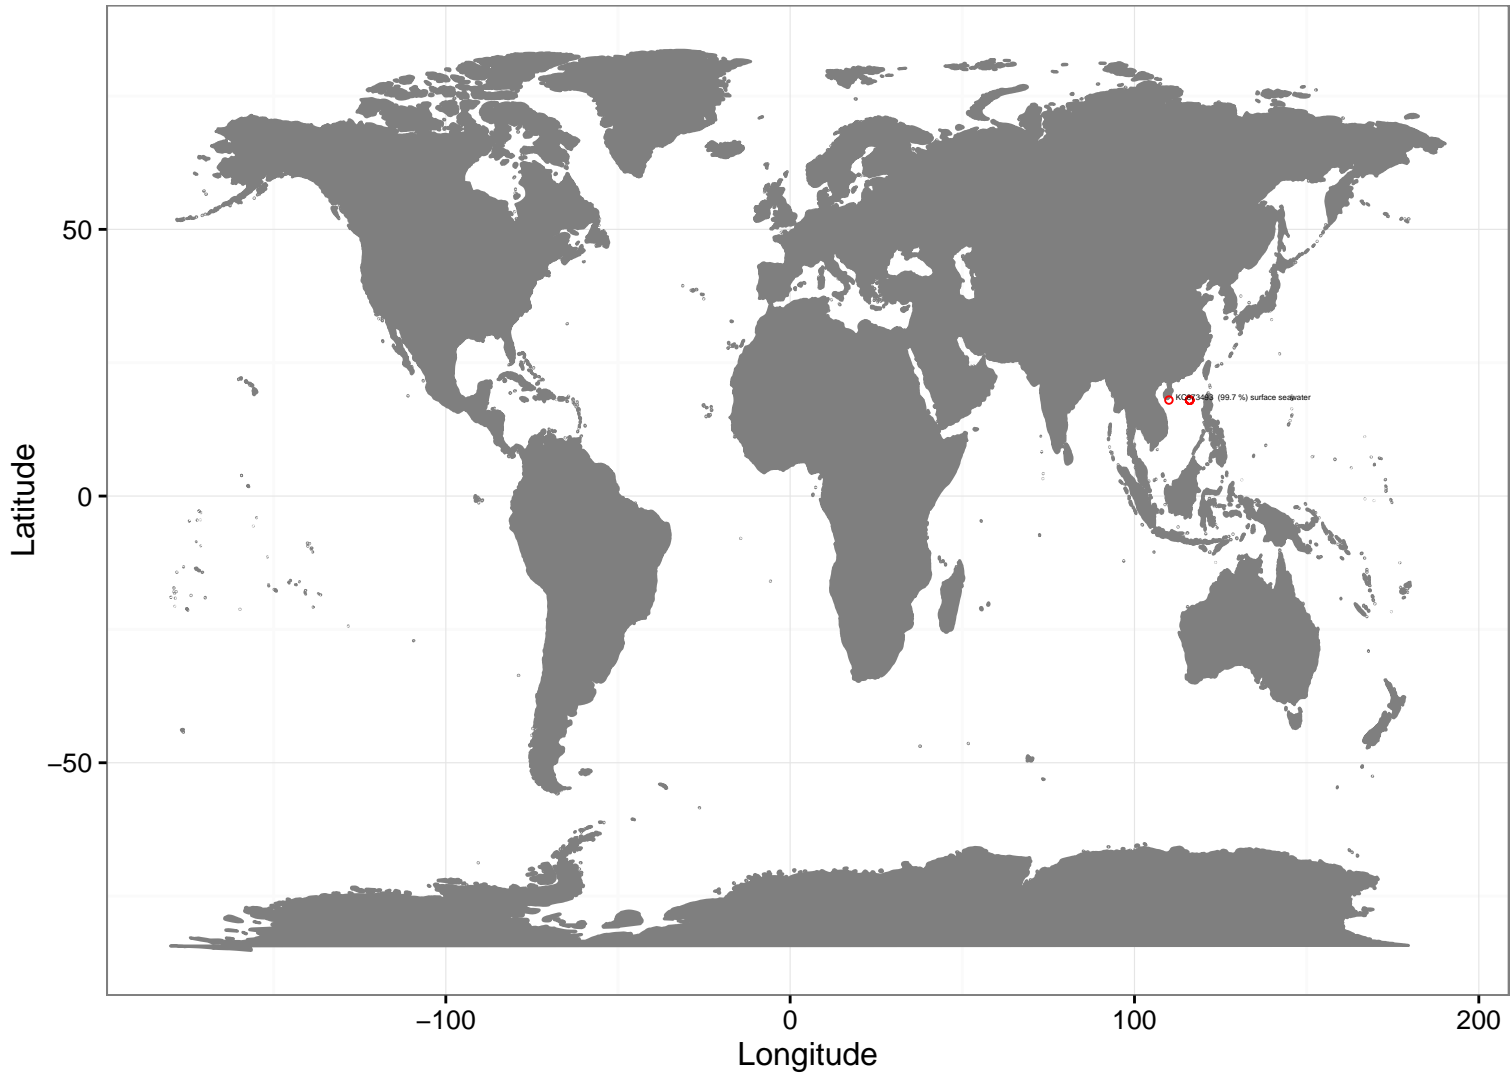



*Ruegeria lacuscaerulensis* ITI-1157T (DB ID: t\_28)

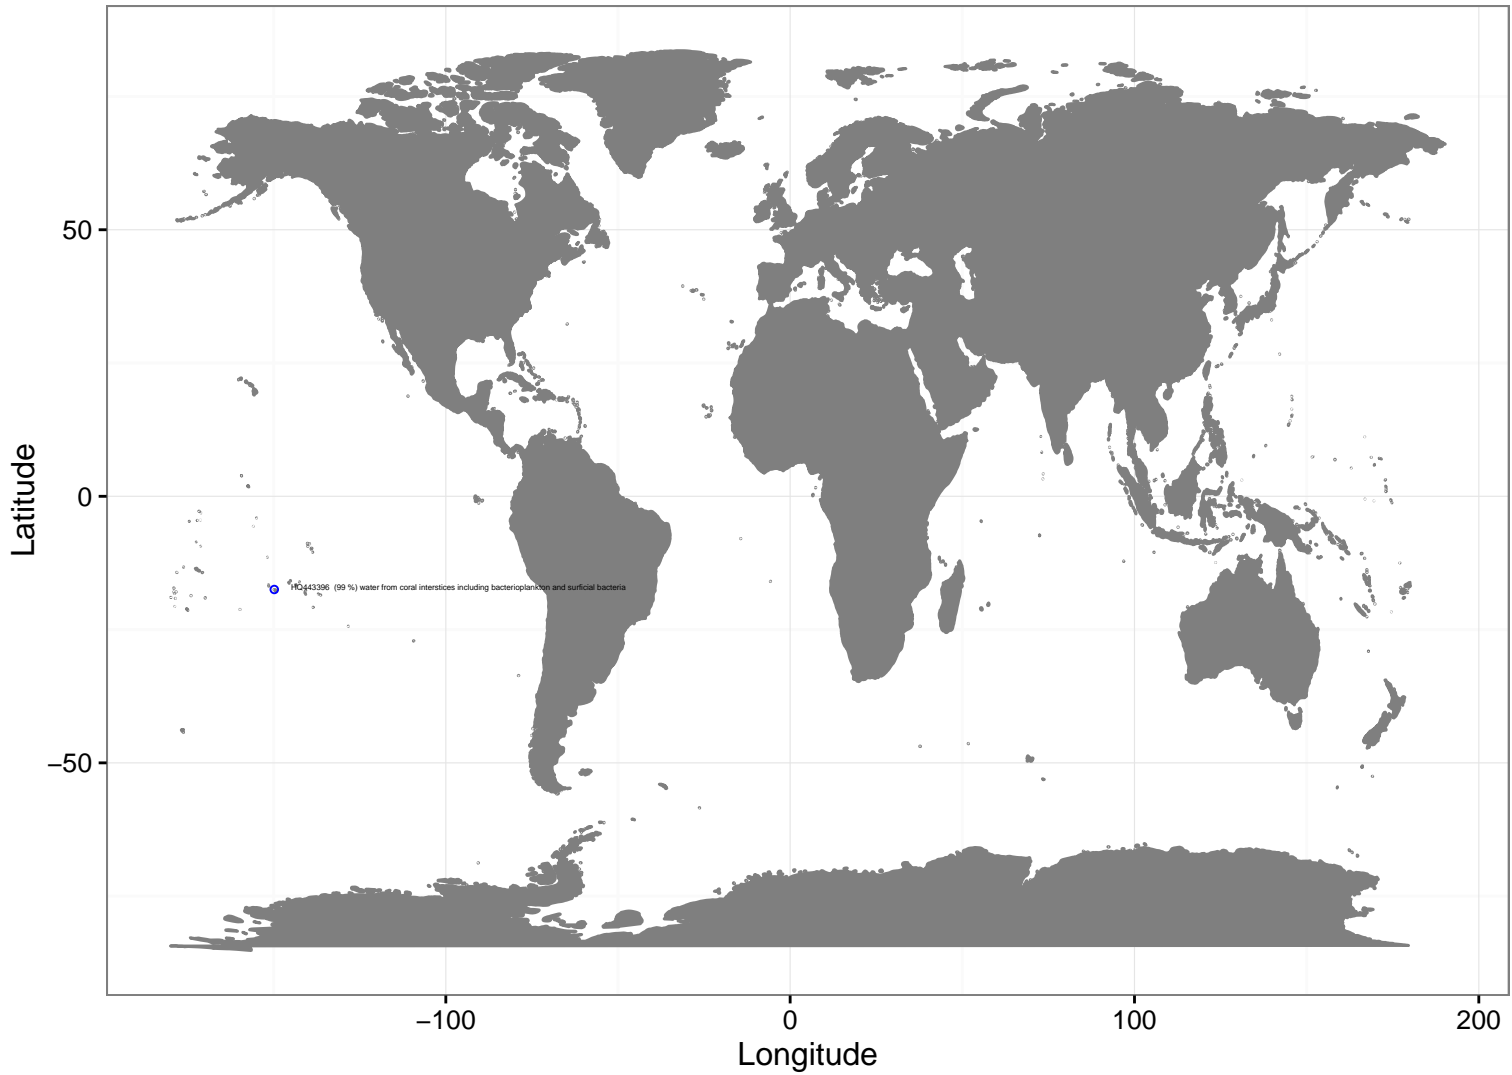

*Sagittula stellata* E-37T (DB ID: t\_29)

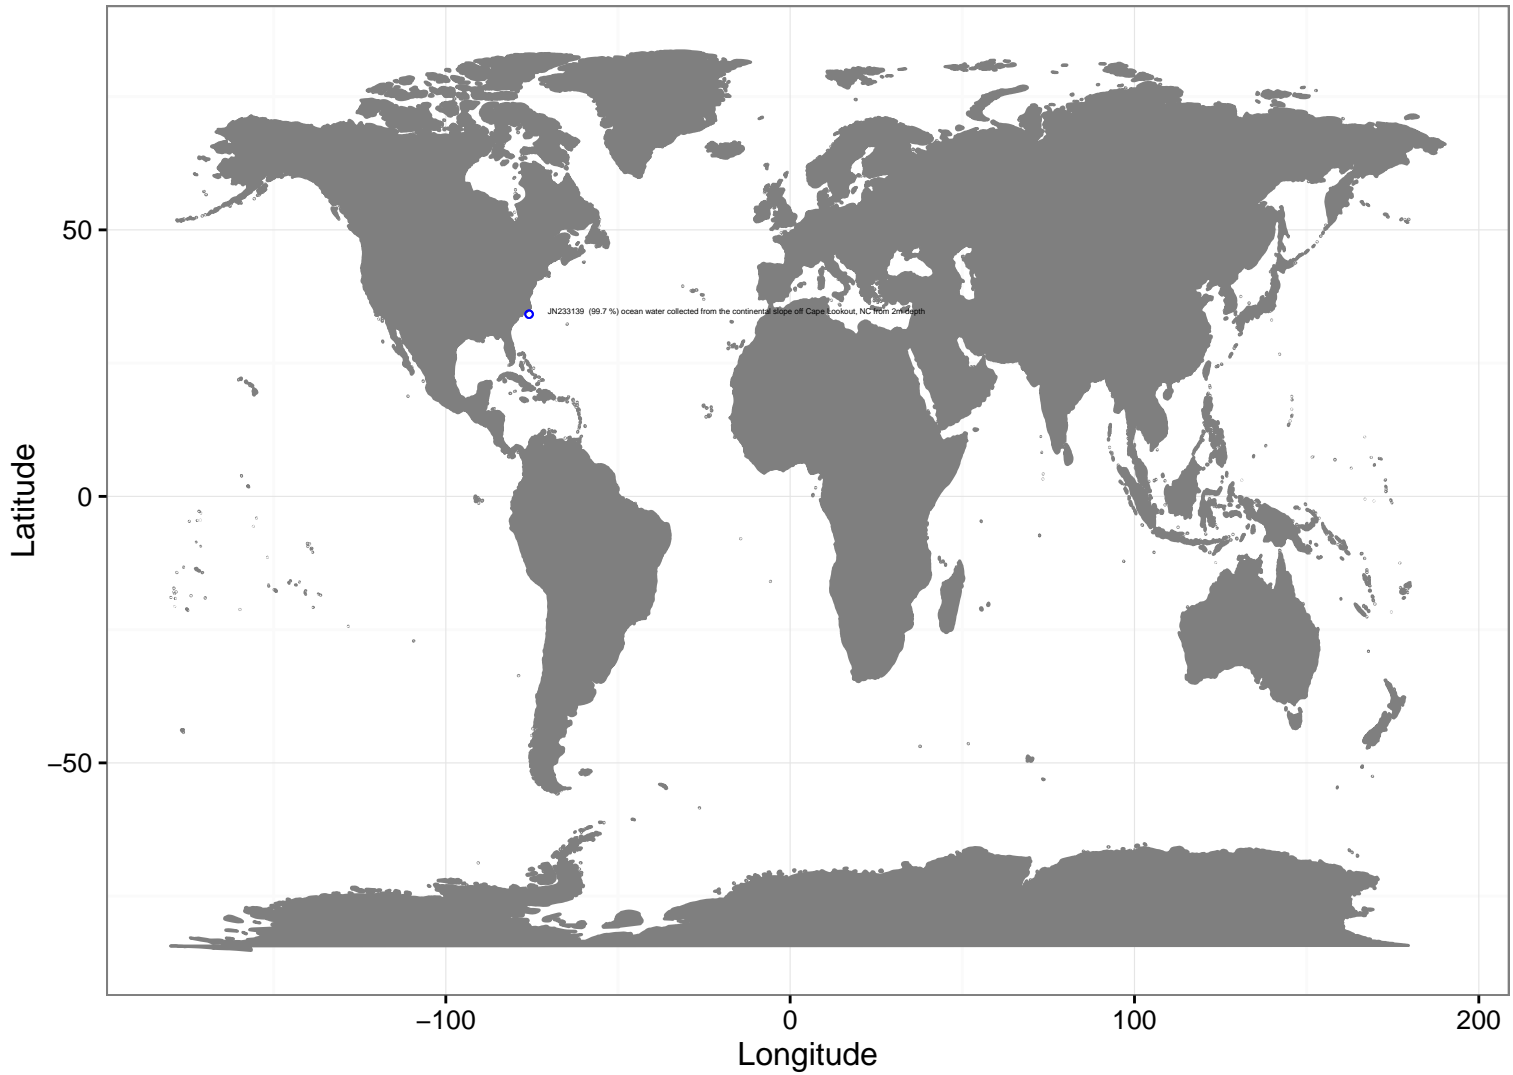

*Ruegeria* sp. TM1040 (DB ID: t\_32 )

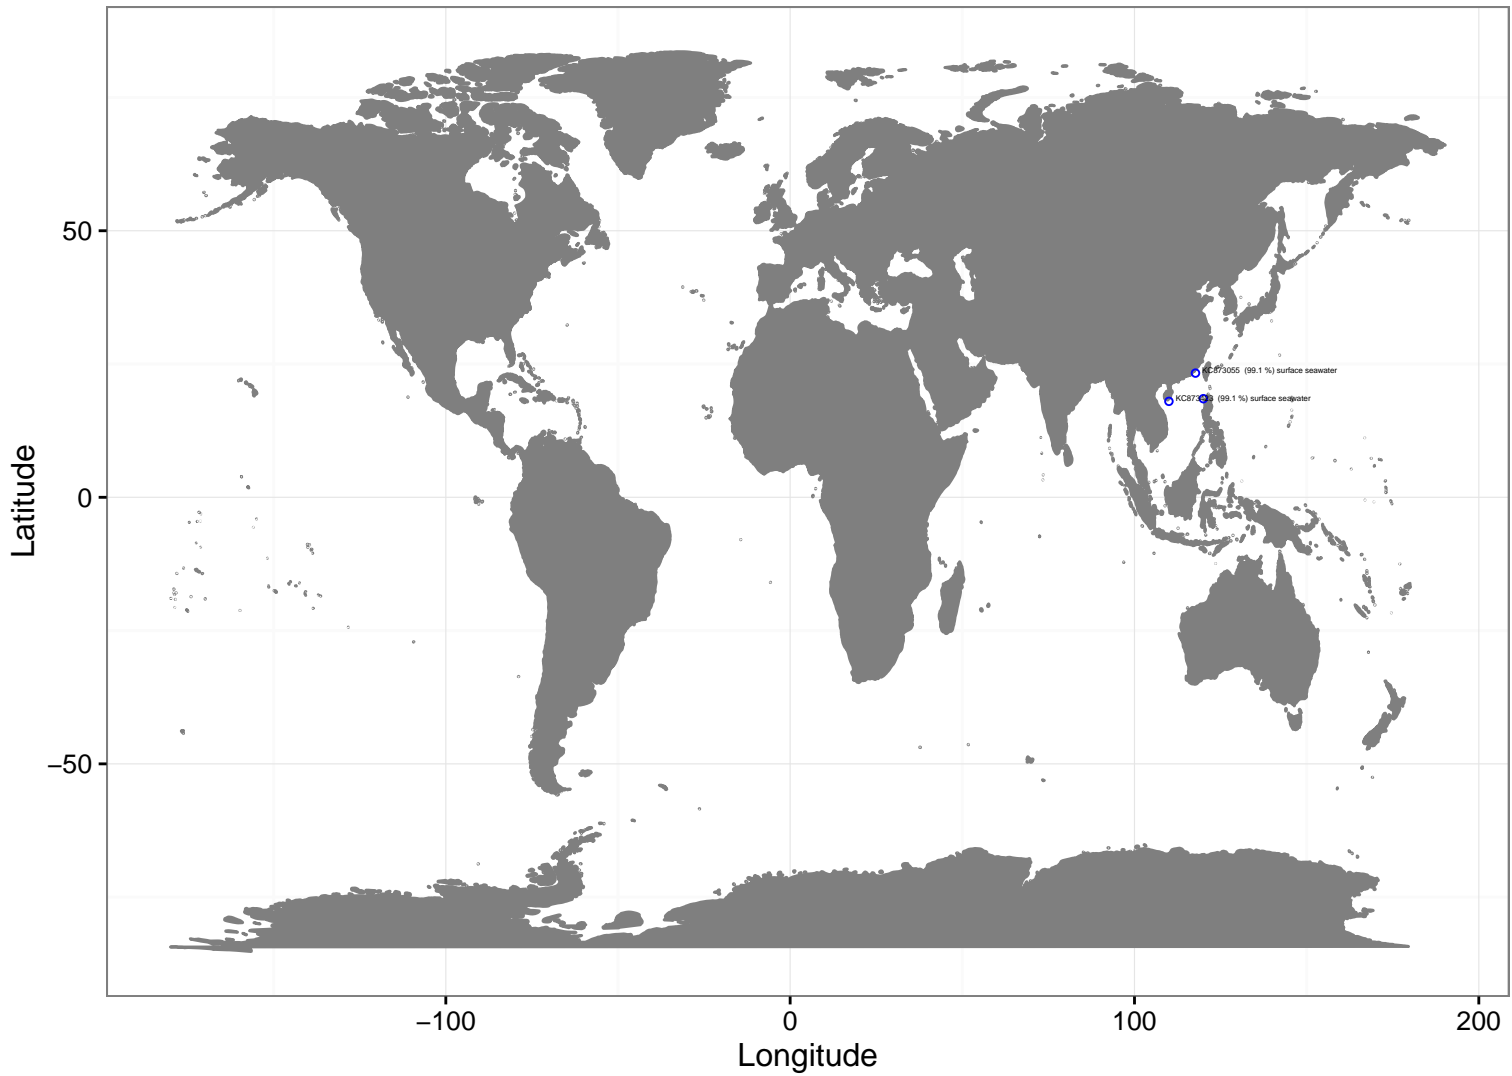

*Rhodobacter sphaeroides* ATCC 17029 (DB ID: t\_34)

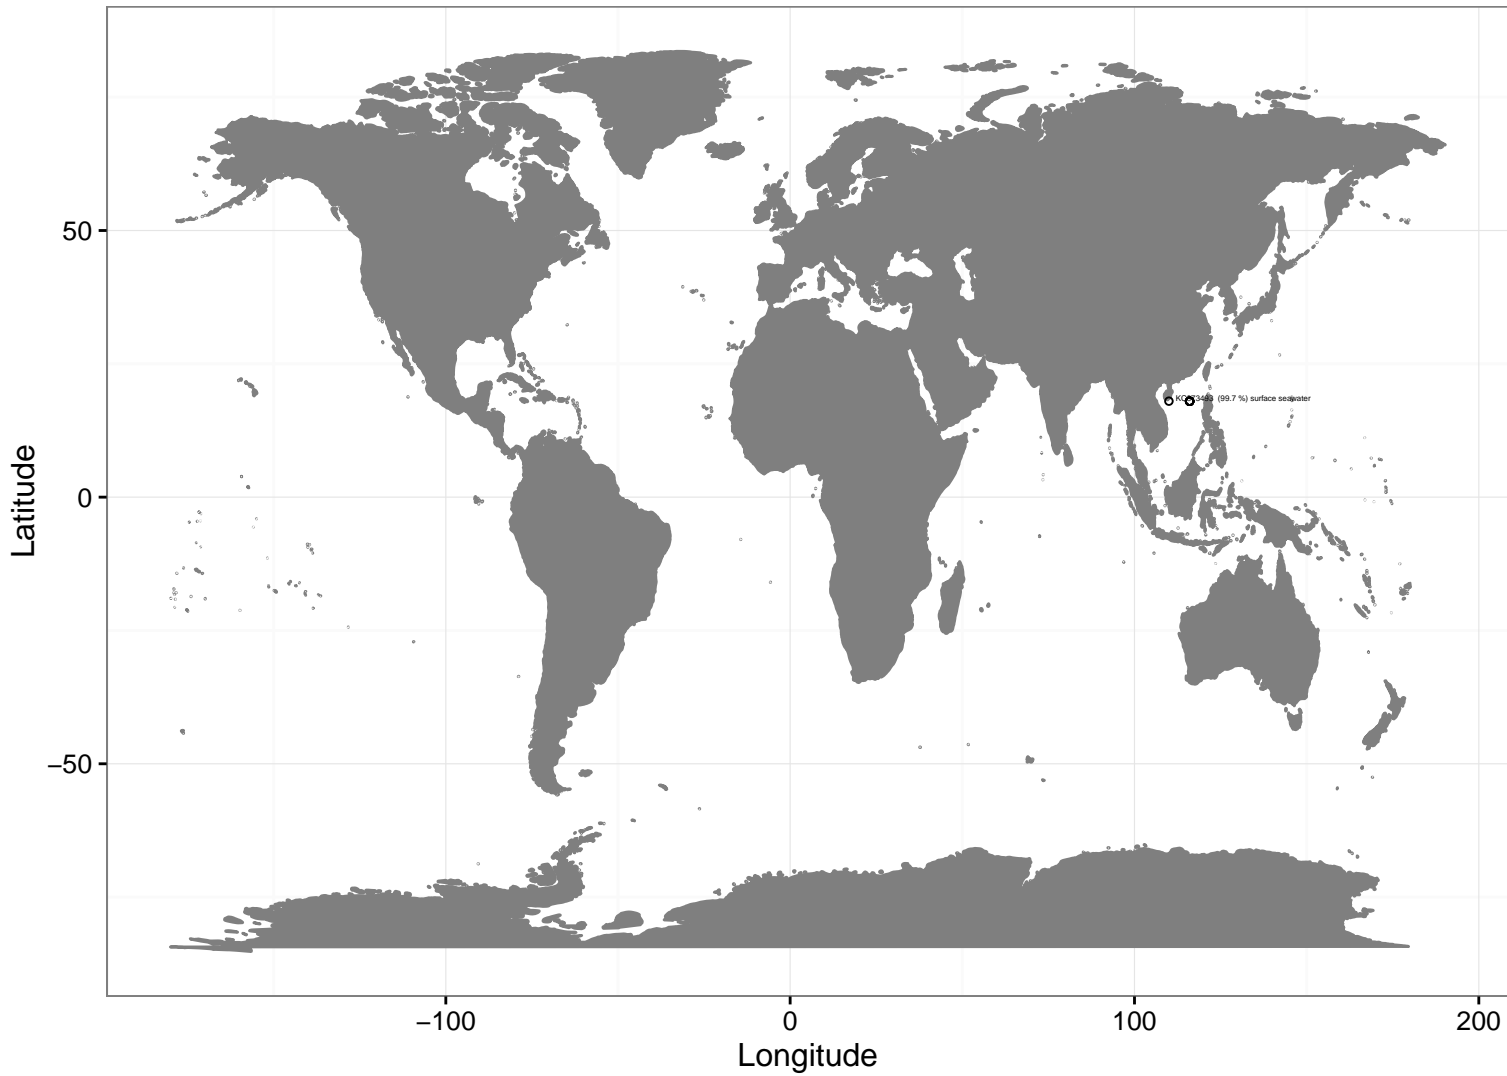

*Rhodobacter sphaeroides* KD131 (DB ID: t\_36)

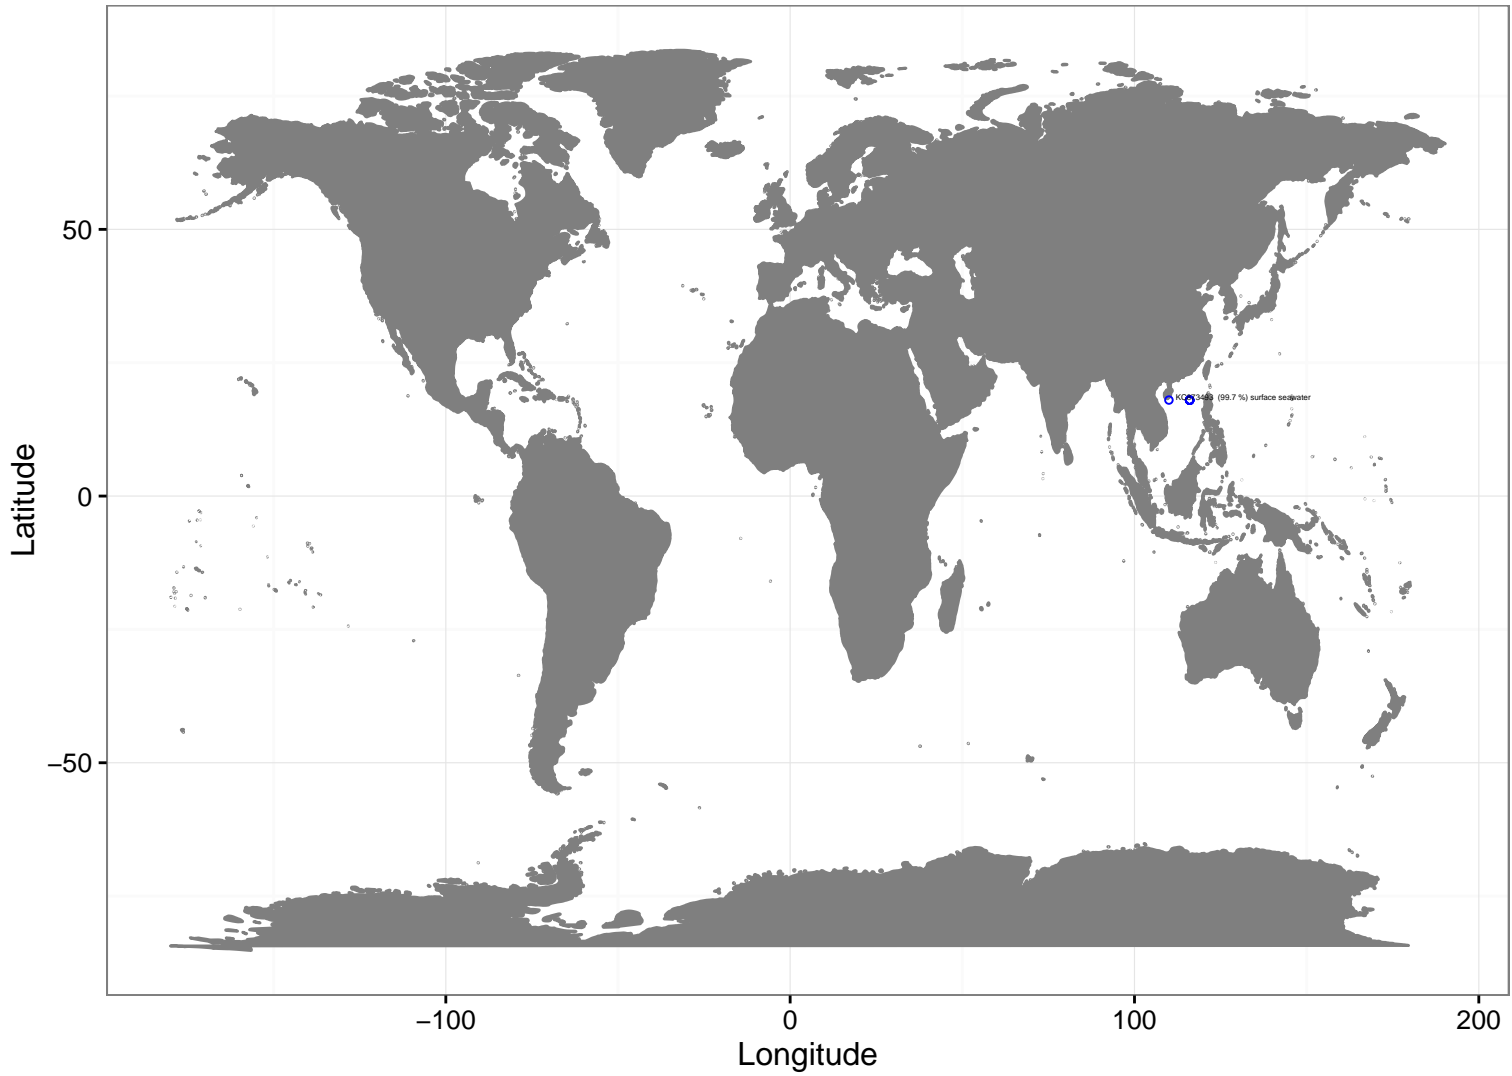

# *Oceanibulbus indolifex* HEL-45T (DB ID: t\_4)

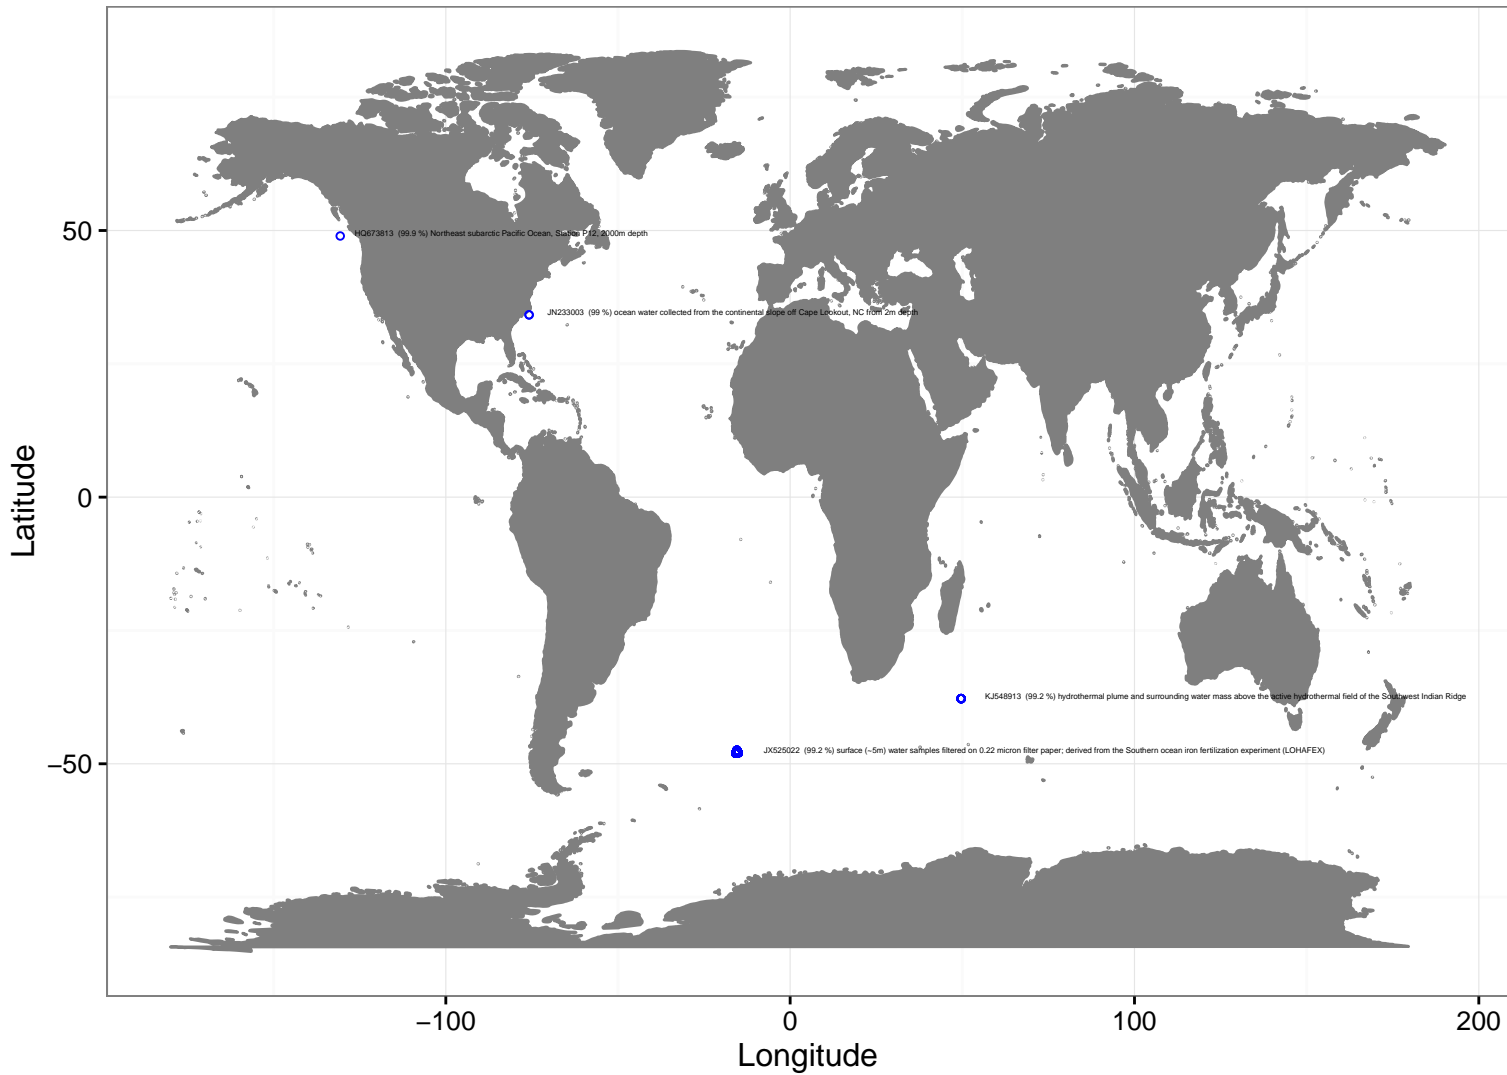

*Phaeobacter inhibens* 2.10 (DB ID: t\_41 )

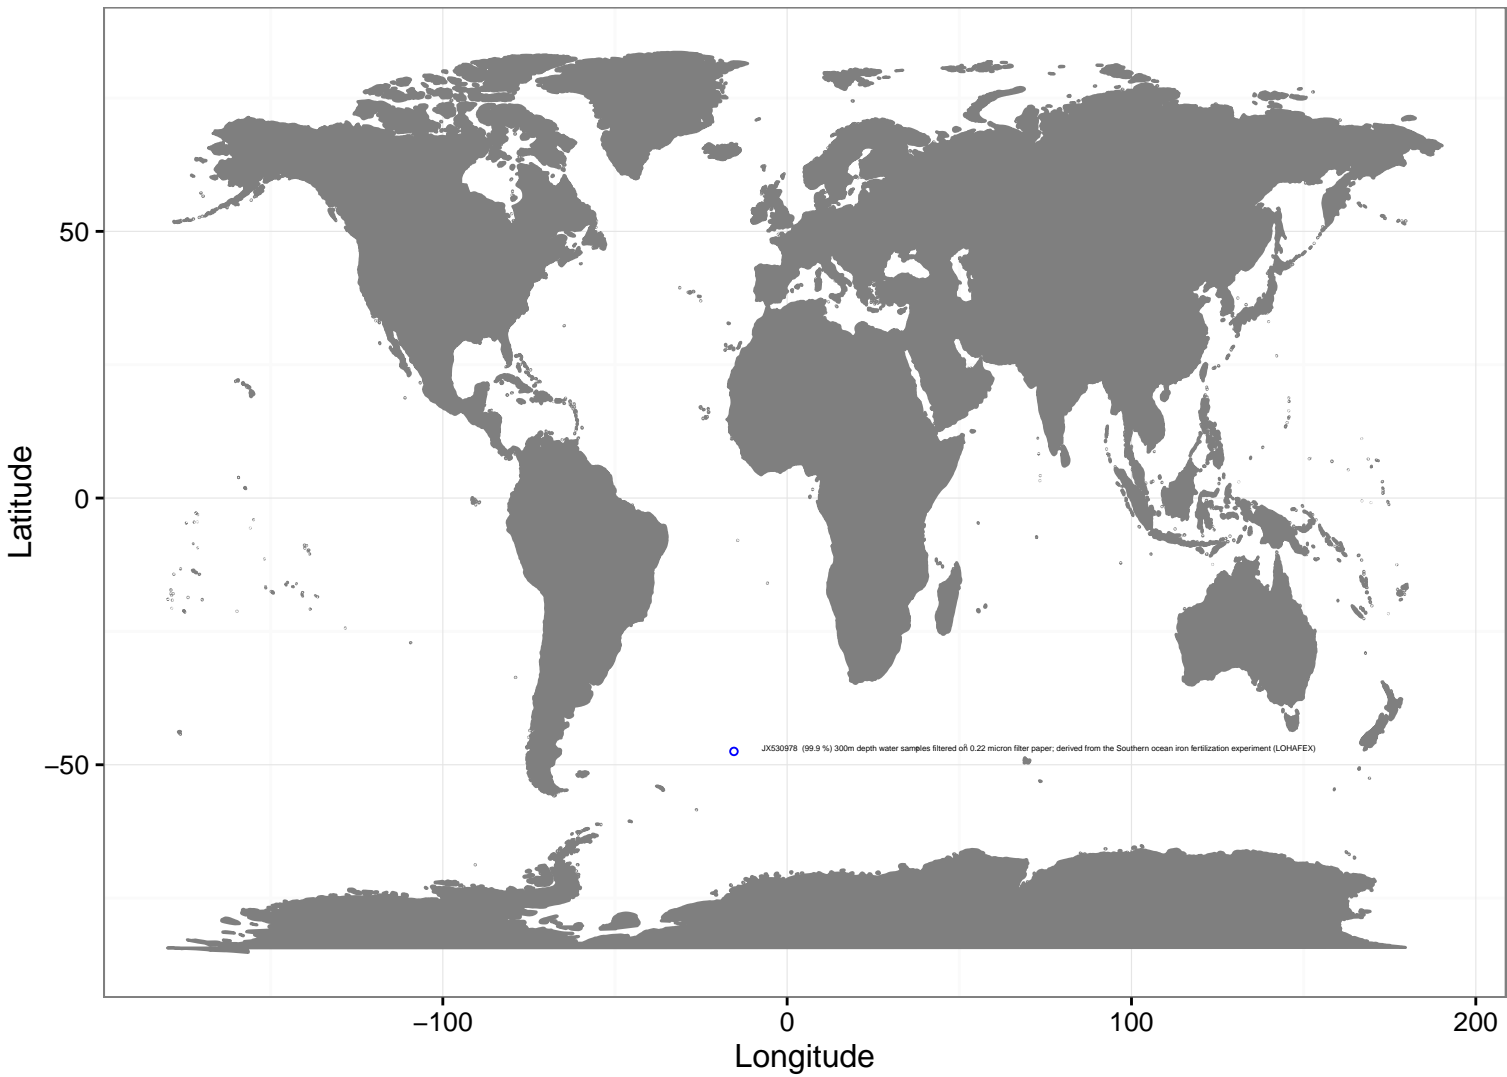

*Phaeobacter inhibens* DSM 17395 (DB ID: t\_42)

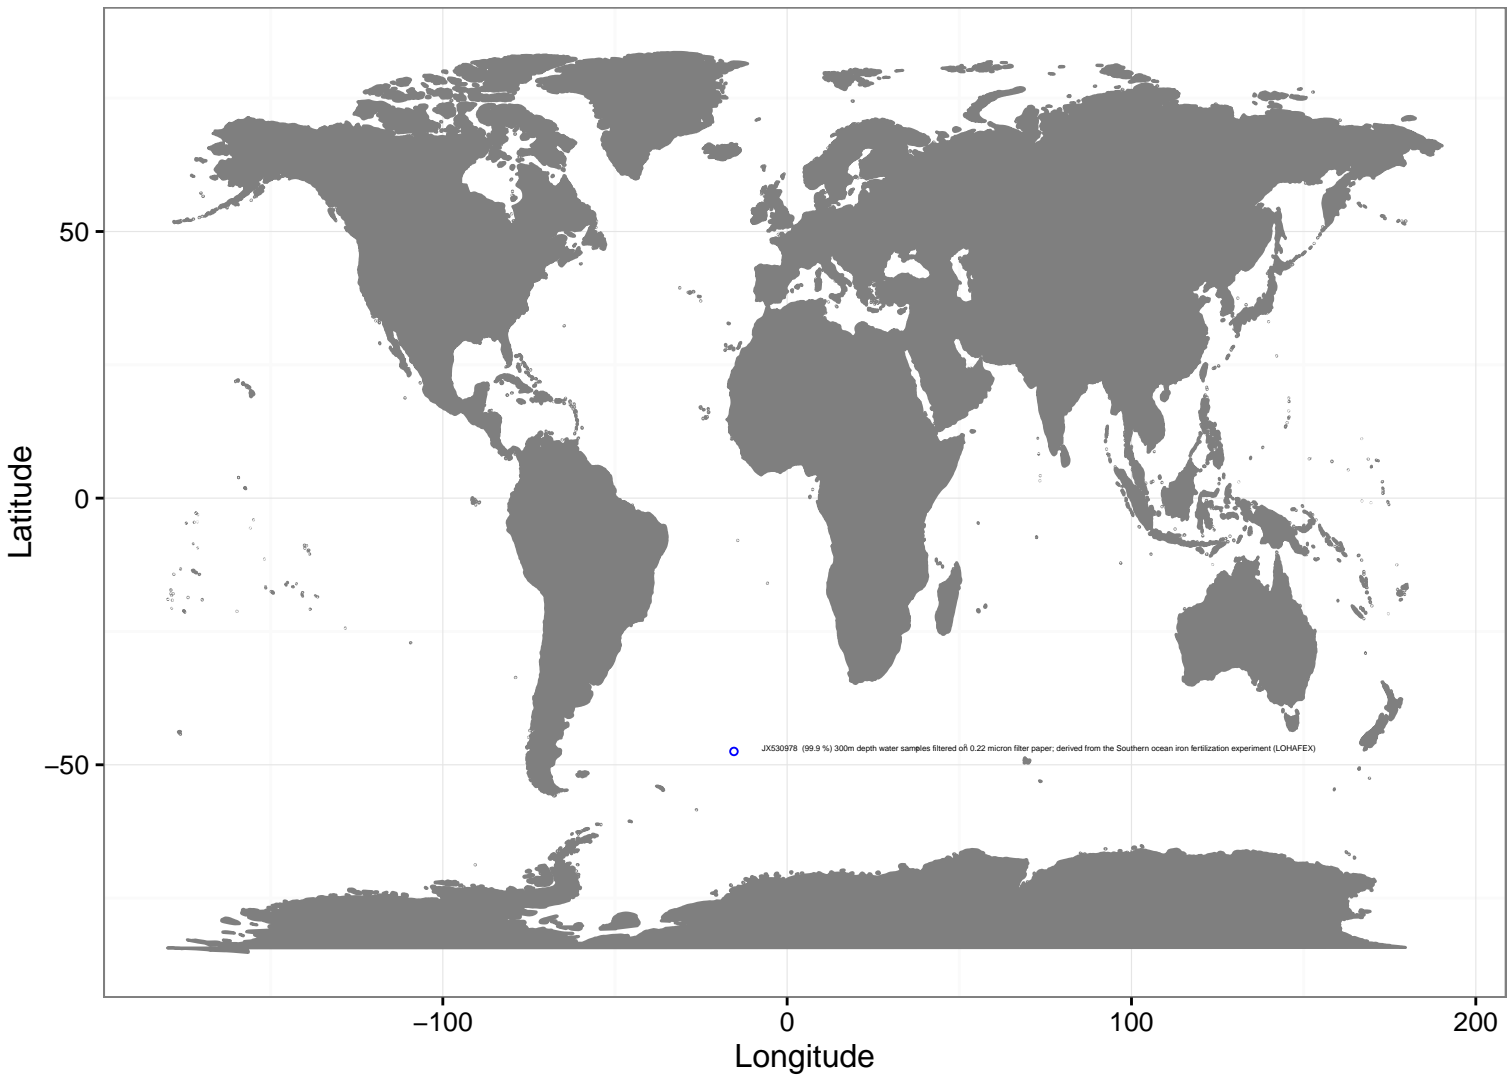



*Pseudovibrio* sp. FO-BEG1 (DB ID: t\_43)

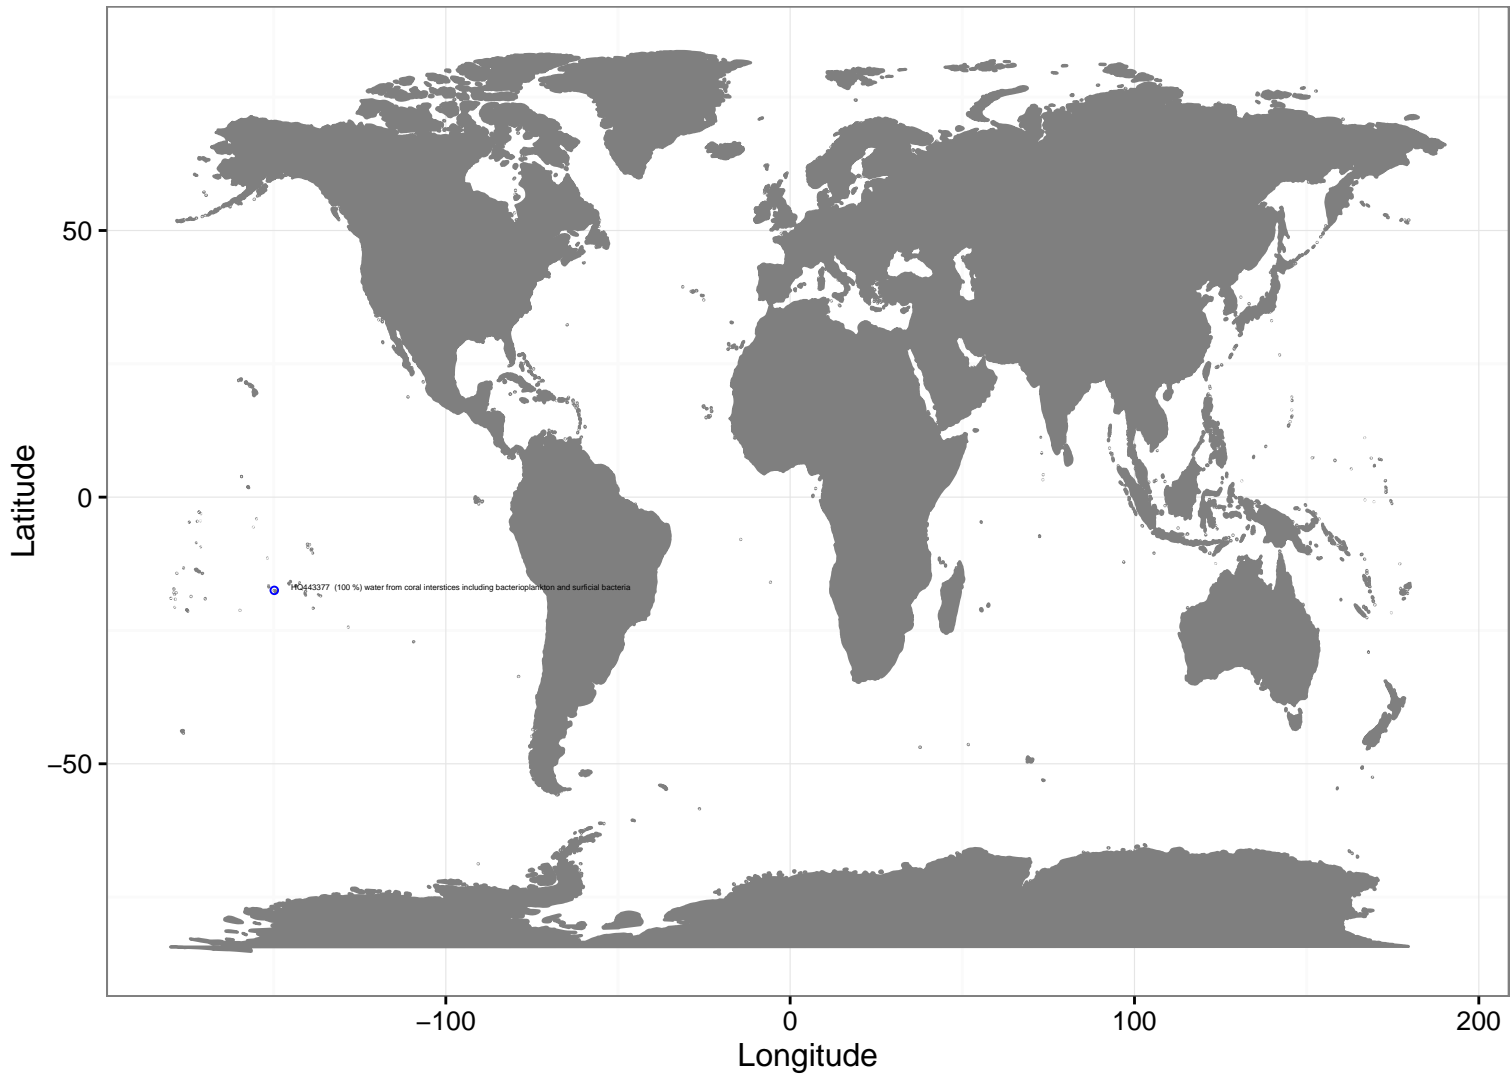

*Loktanella vestfoldensis* SKA53 (DB ID: t\_46)

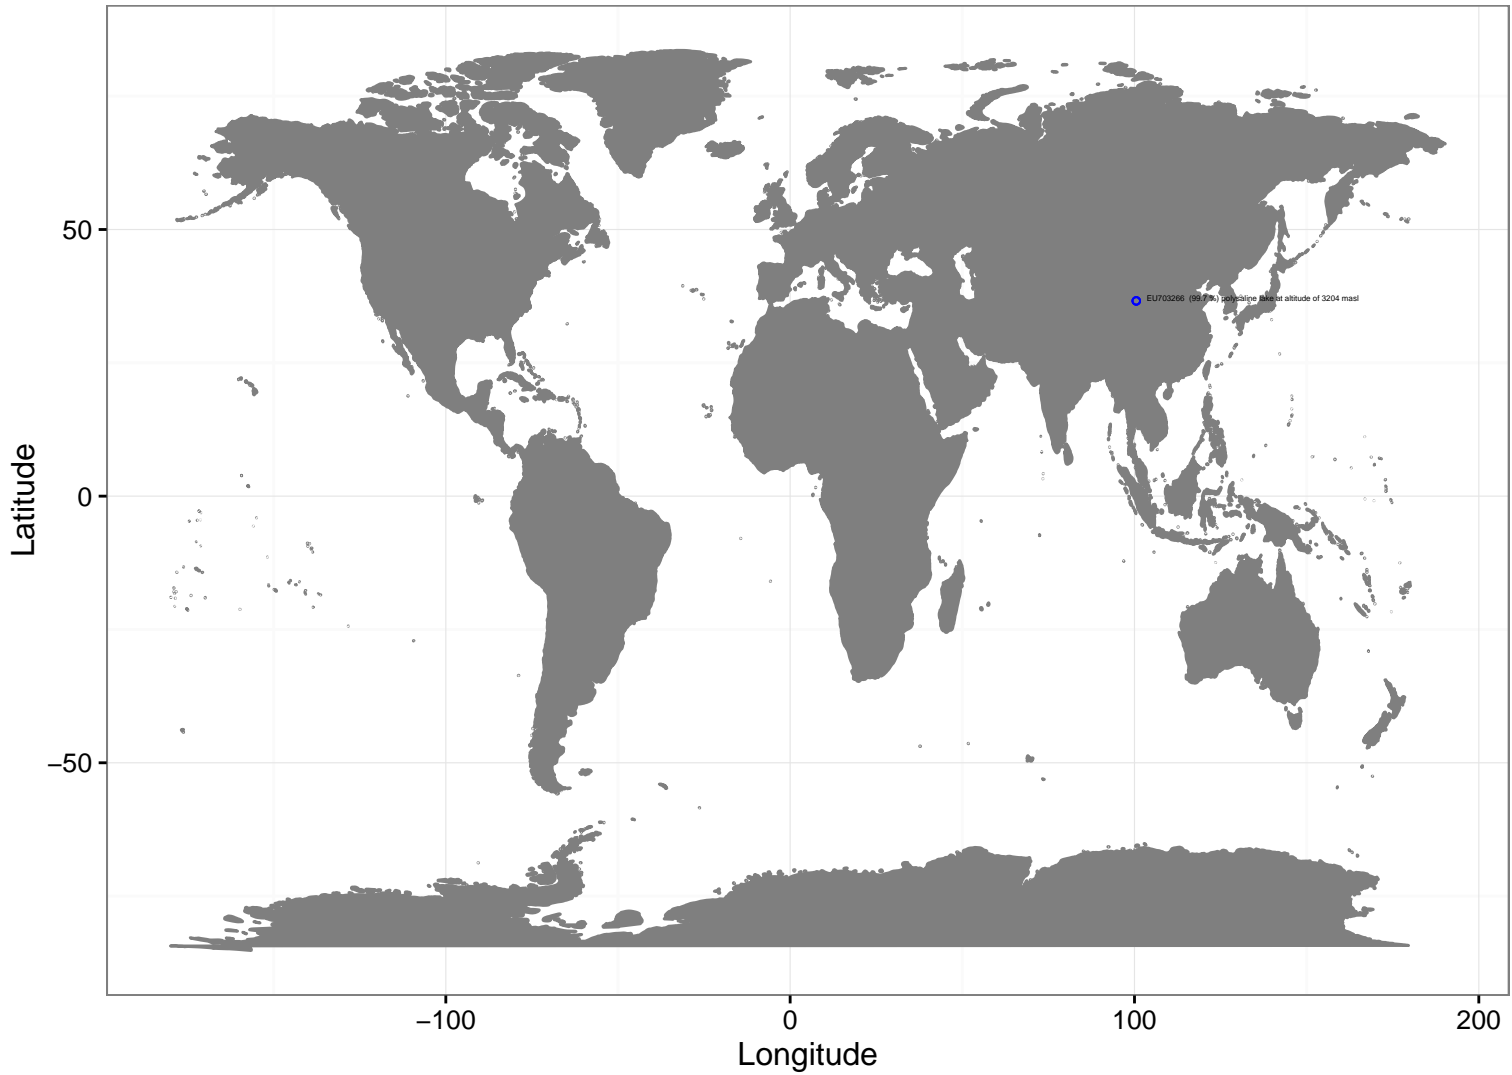

*Roseobacter* sp. CCS2 (DB ID: t\_51 )

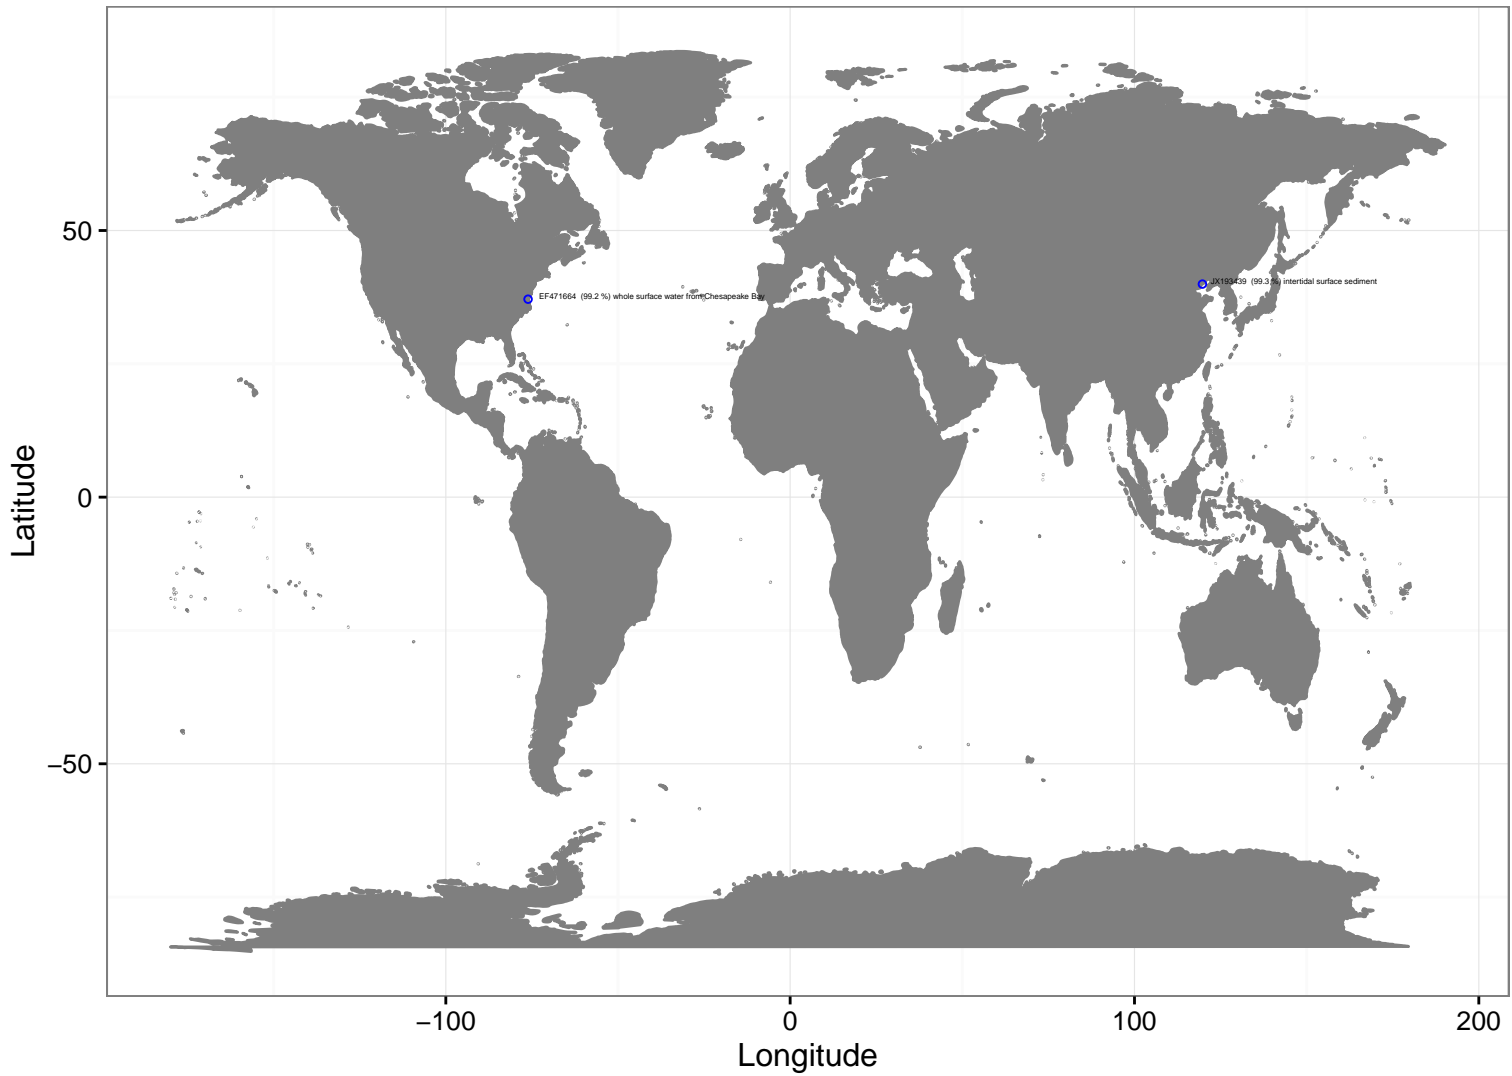

*Roseovarius* sp. TM1035 (DB ID: t\_53)

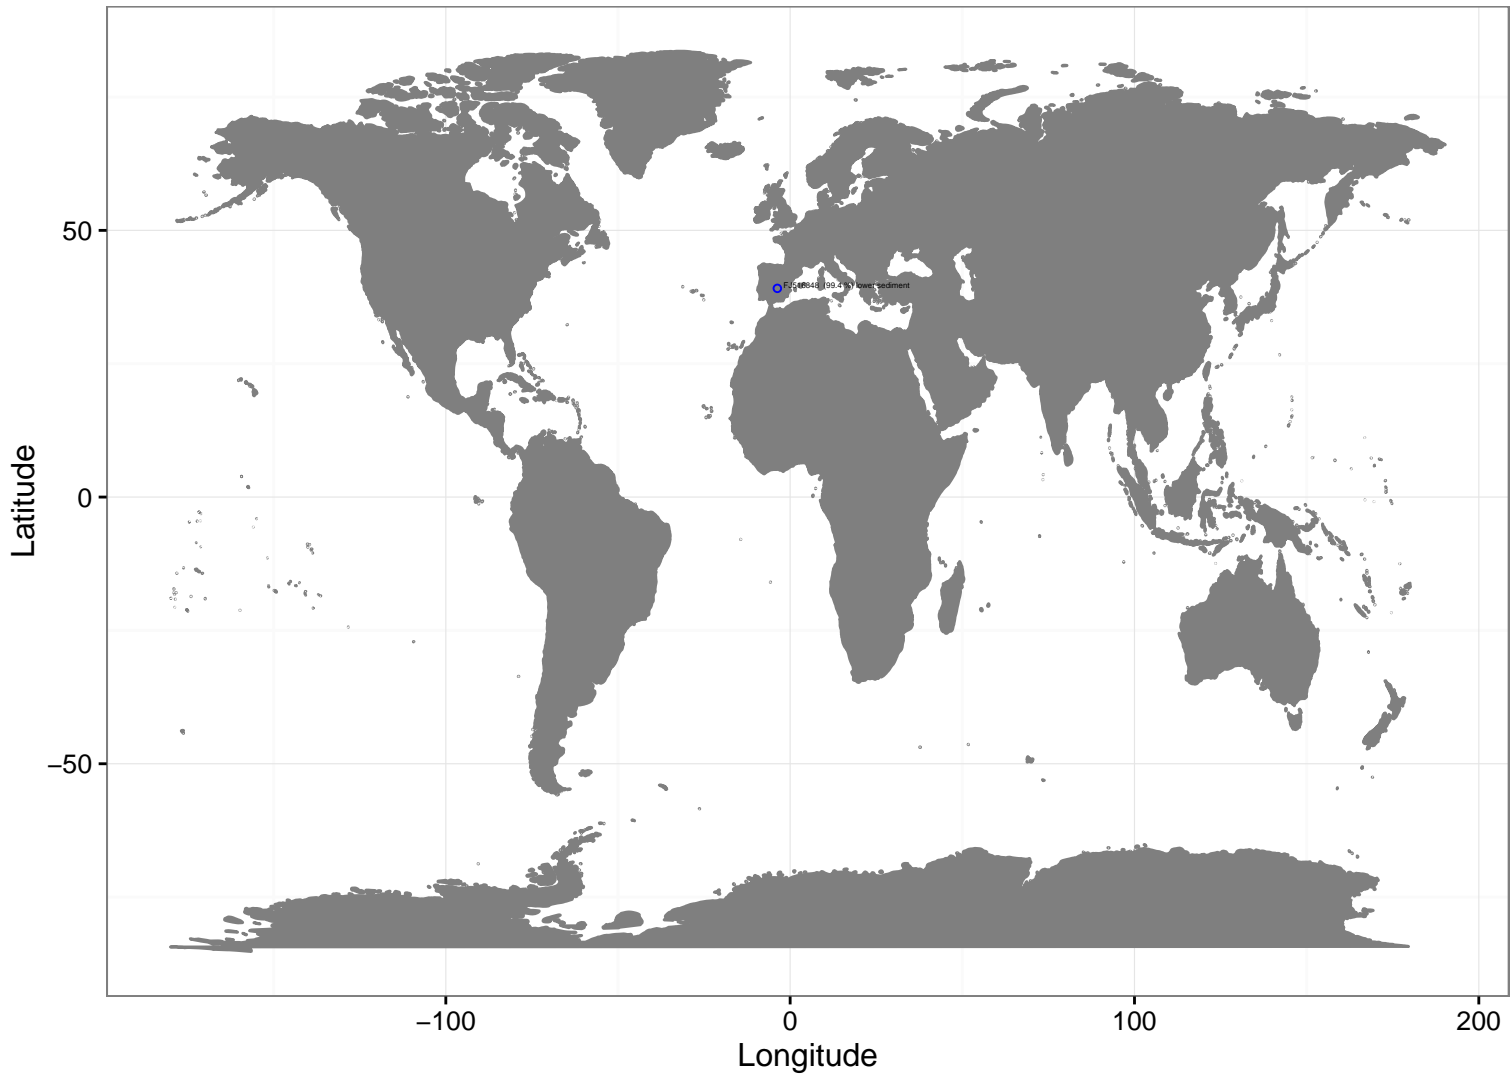

*Pseudovibrio* sp. JE062 (DB ID: t\_66 )

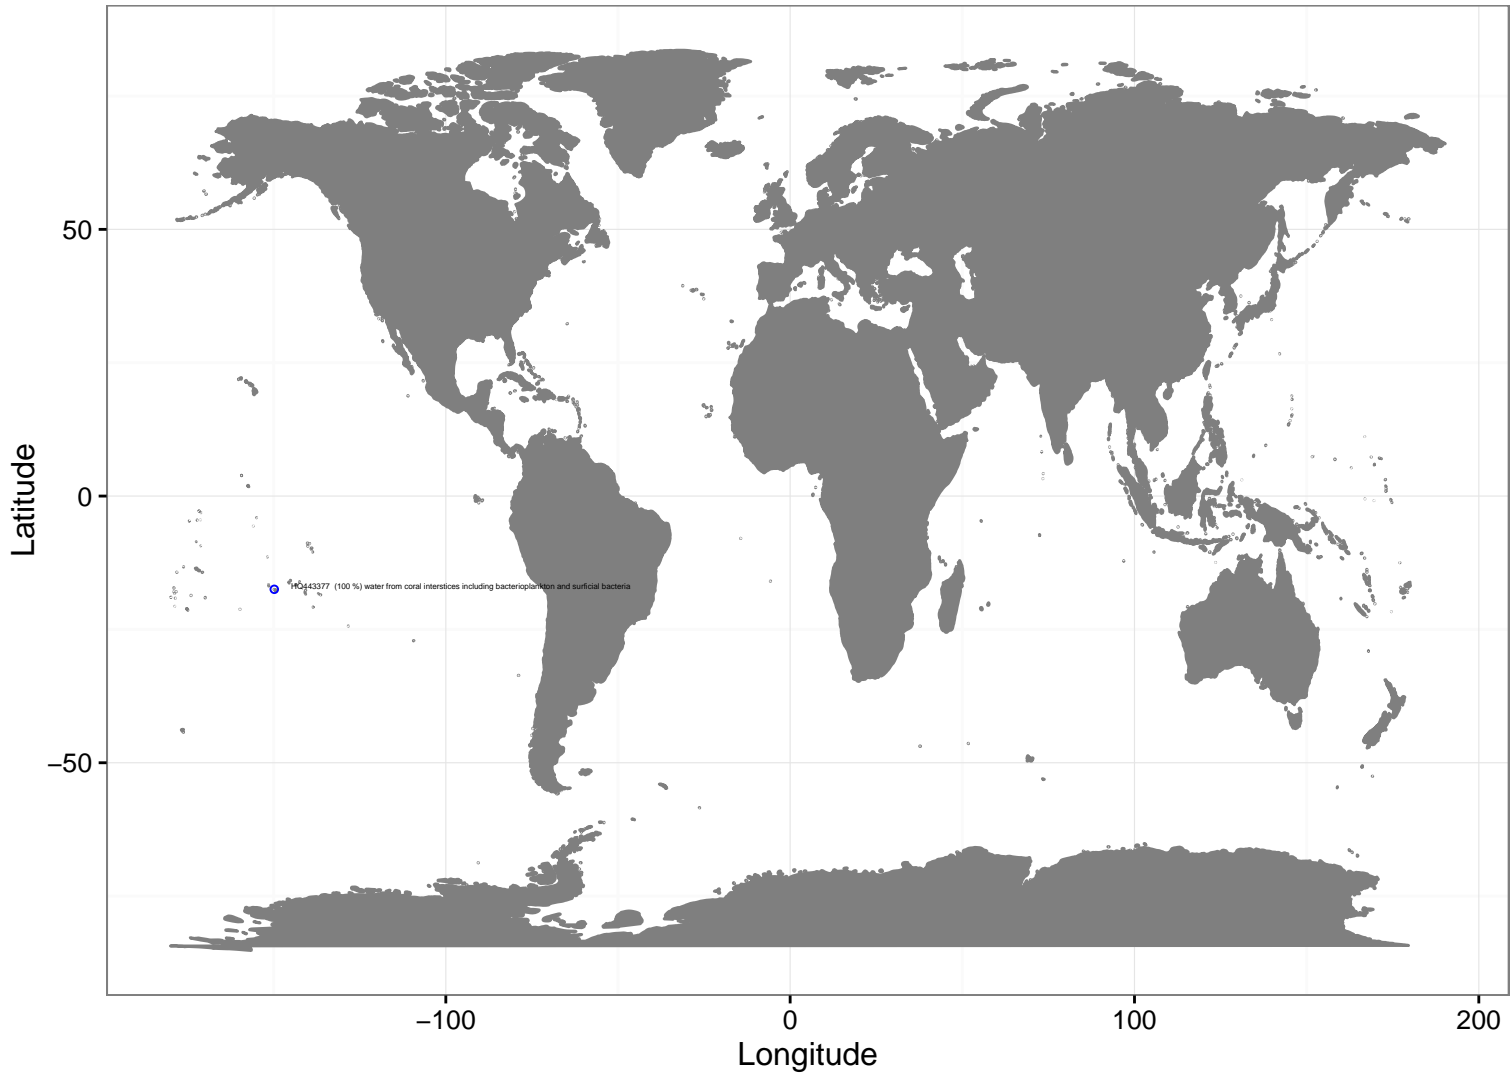

*Rhodobacteraceae* bacterium HTCC2083 (DB ID: t\_67)

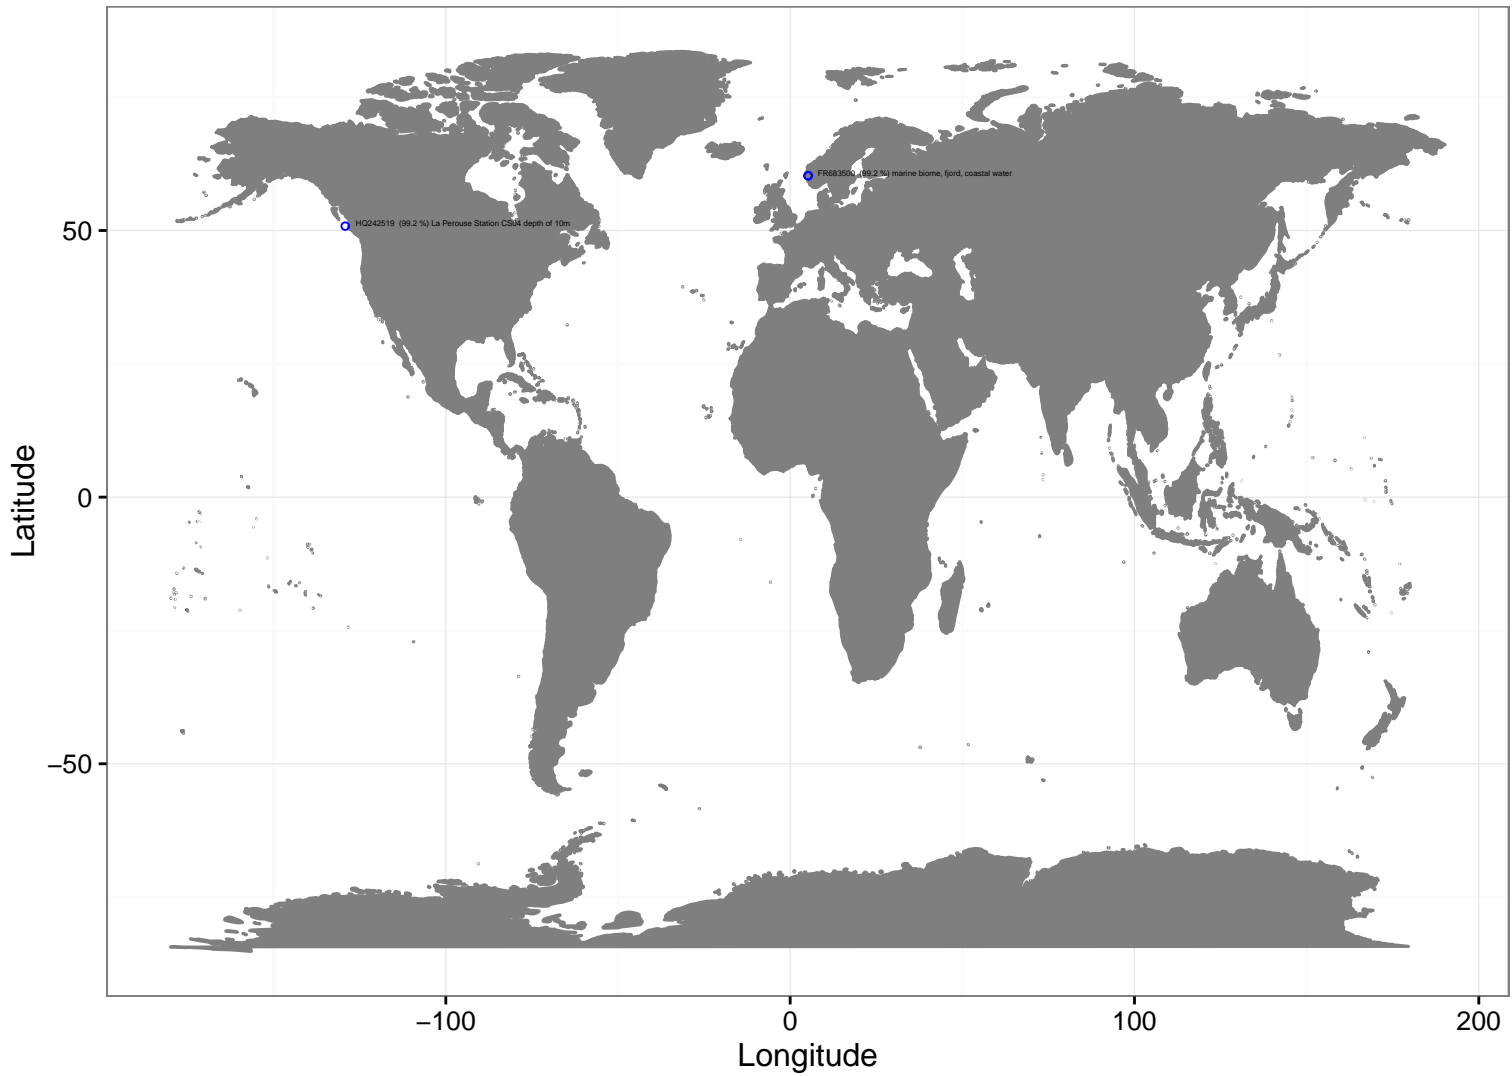

*Ruegeria pomeroyi* DSS-3T (DB ID: t\_7)

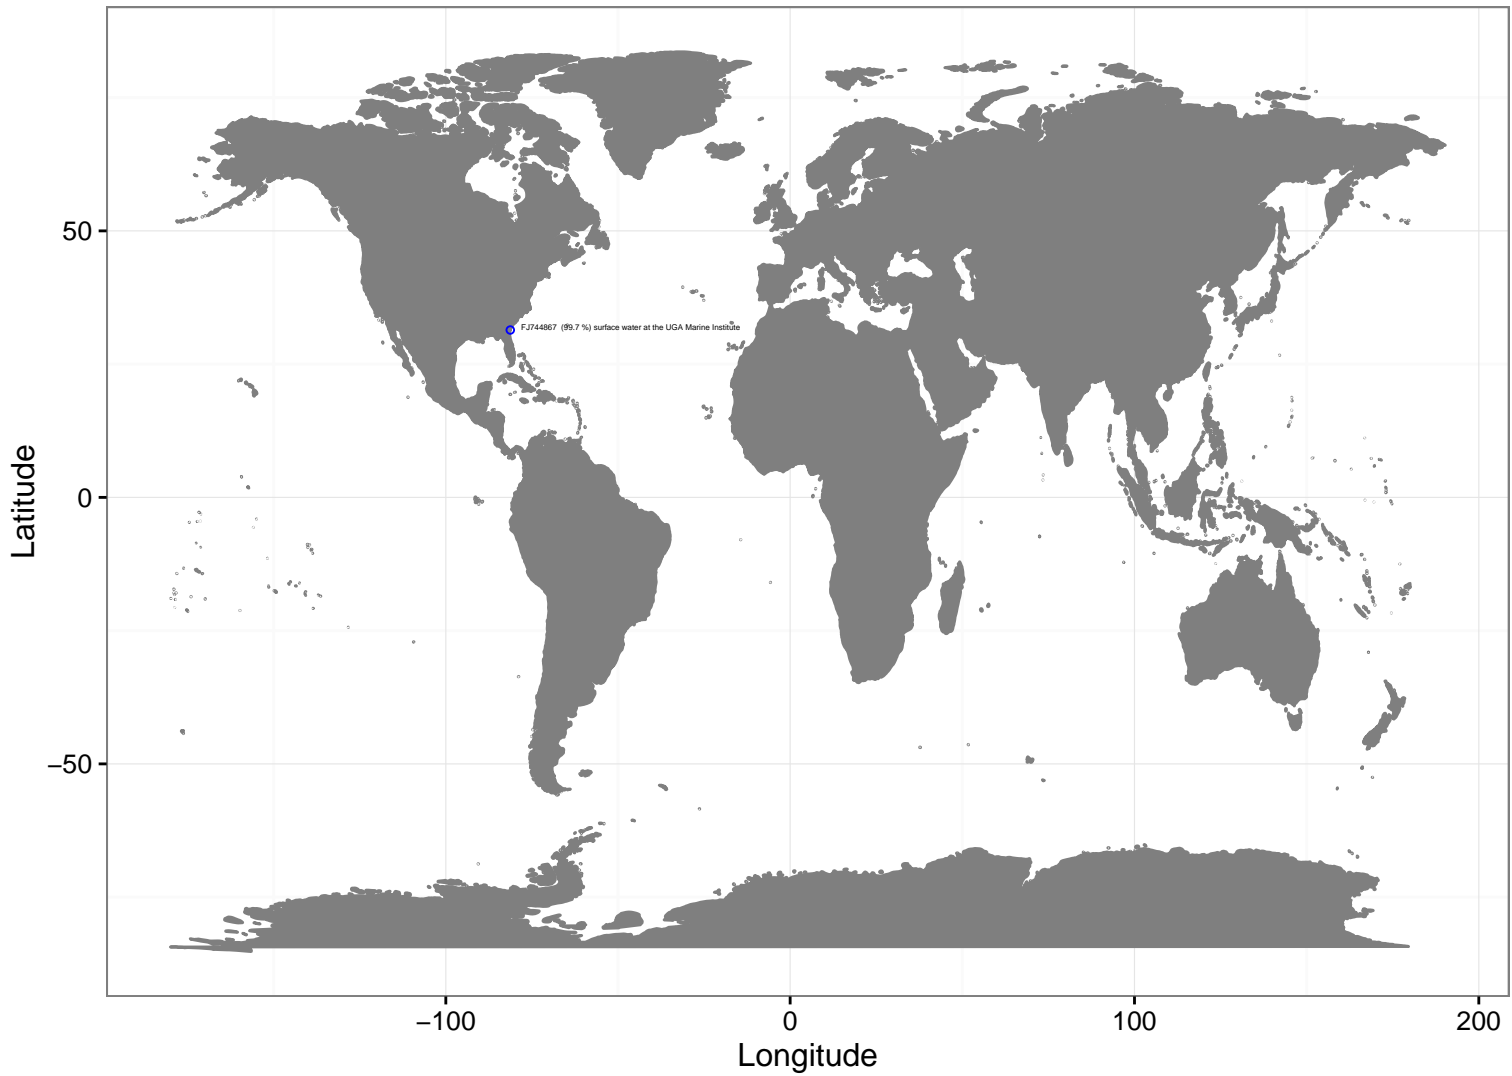

*Roseobacter* sp. GAI101 (DB ID: t\_71)

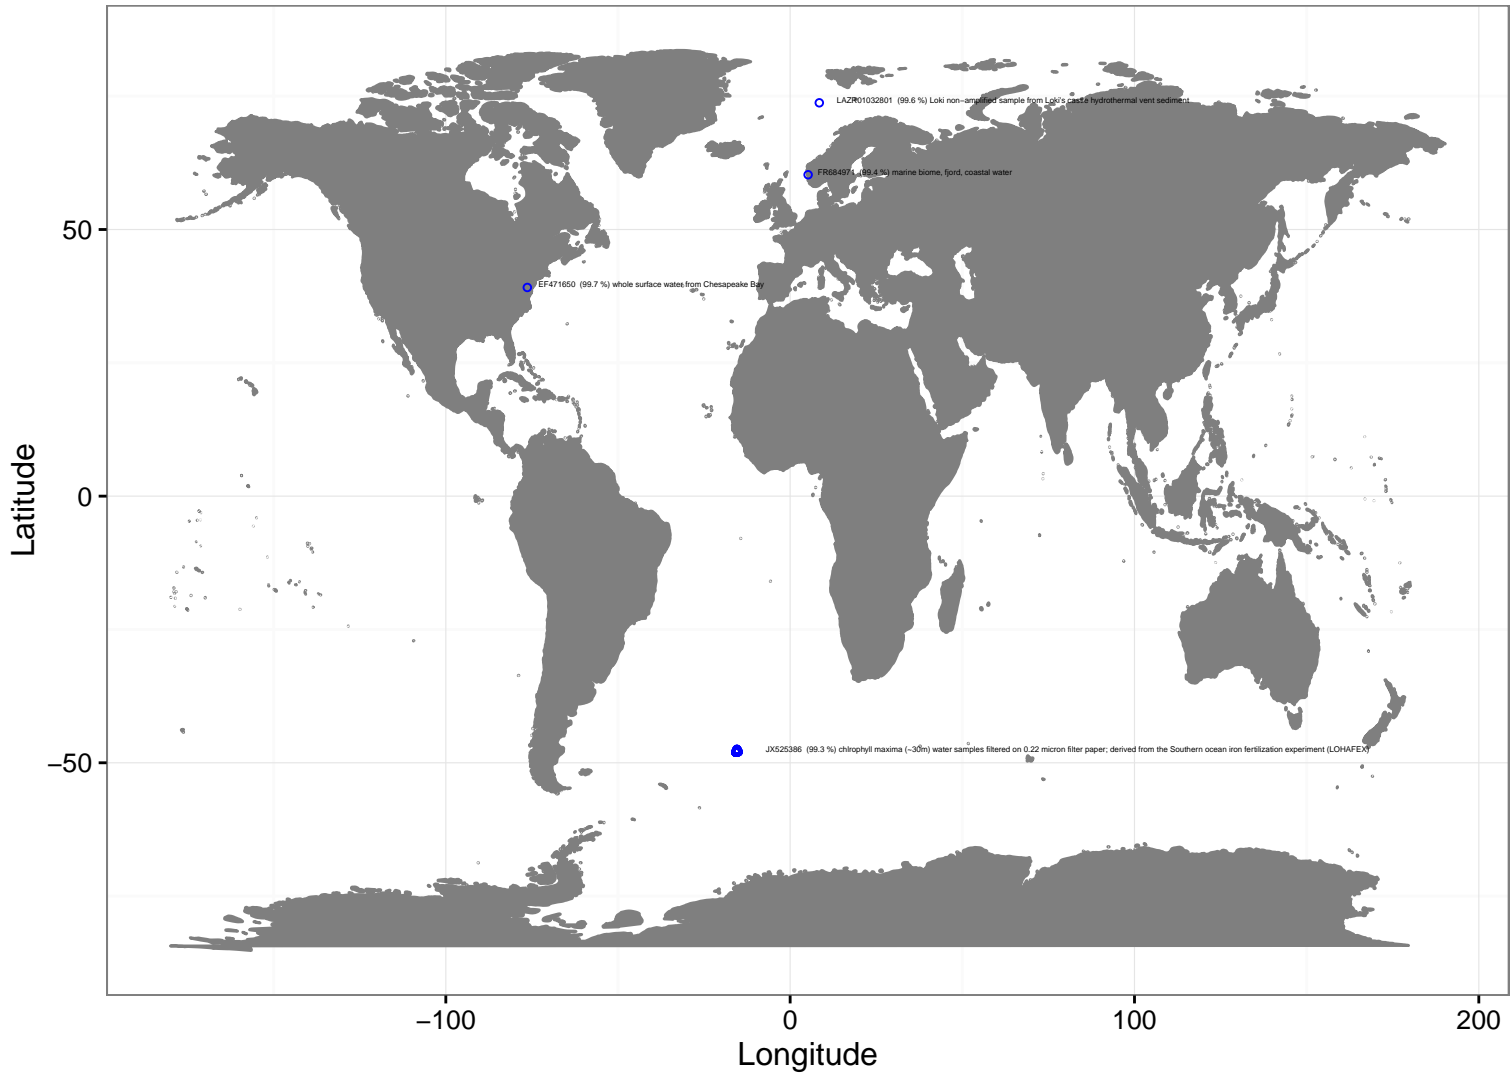



*Ruegeria* sp. R11 (DB ID: t\_72 )

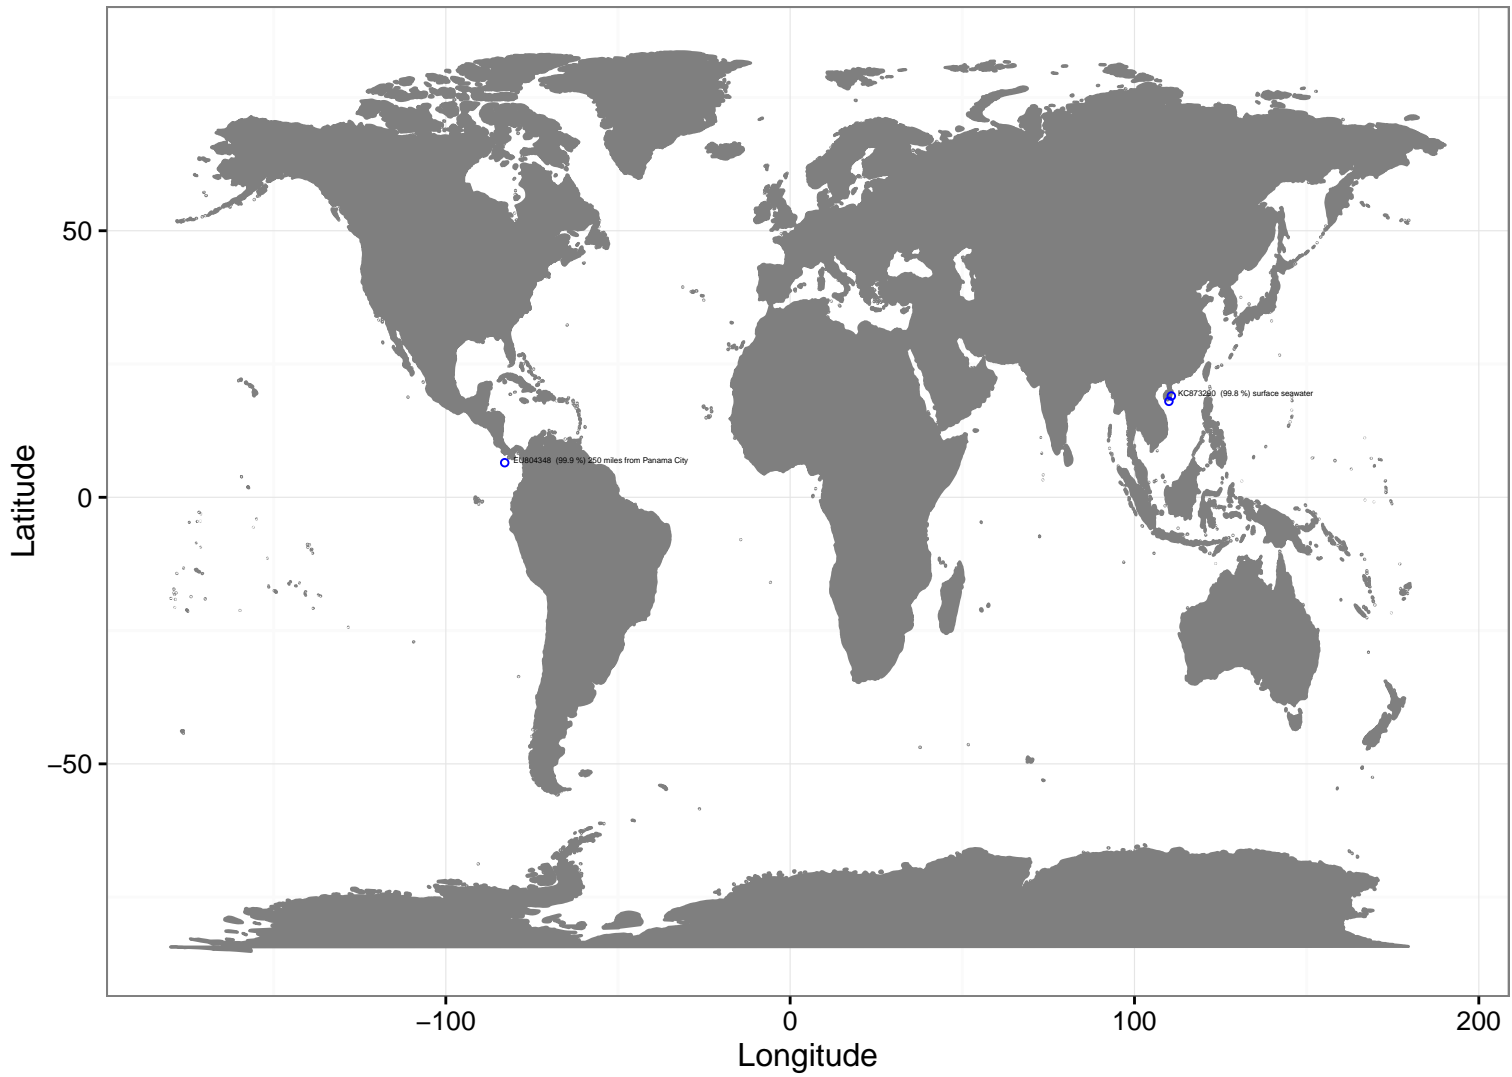

*Ruegeria conchae* TW15T (DB ID: t\_73 )

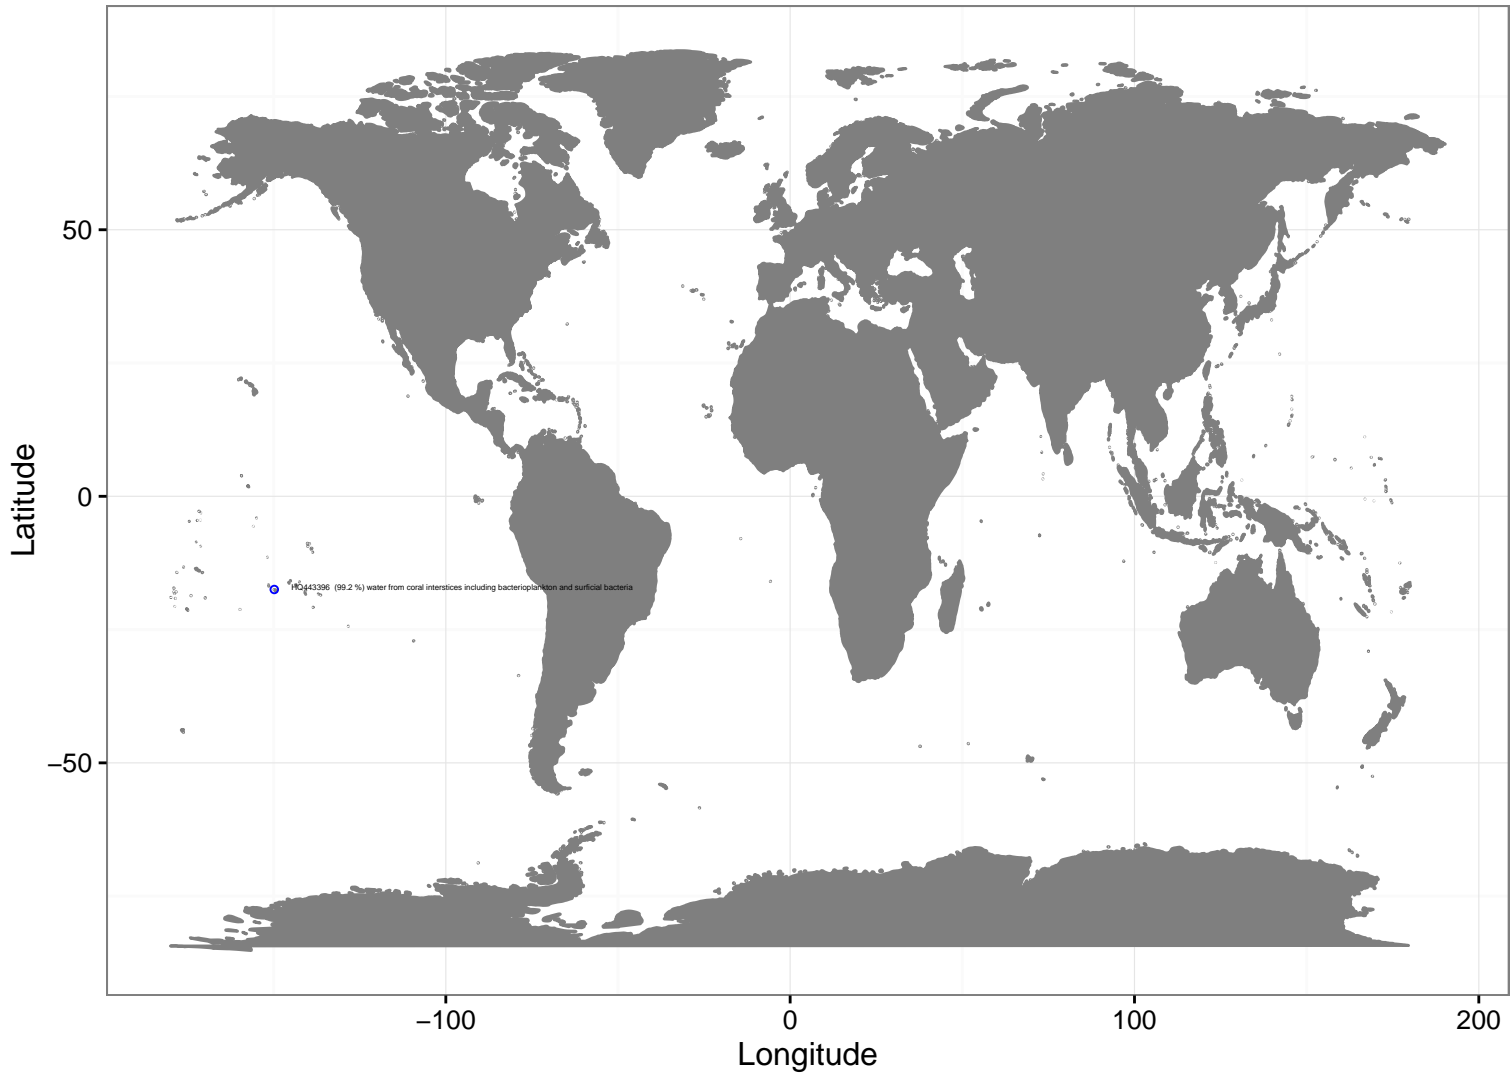

*Ruegeria* sp. *Trich* CH4B (DB ID: t\_74)

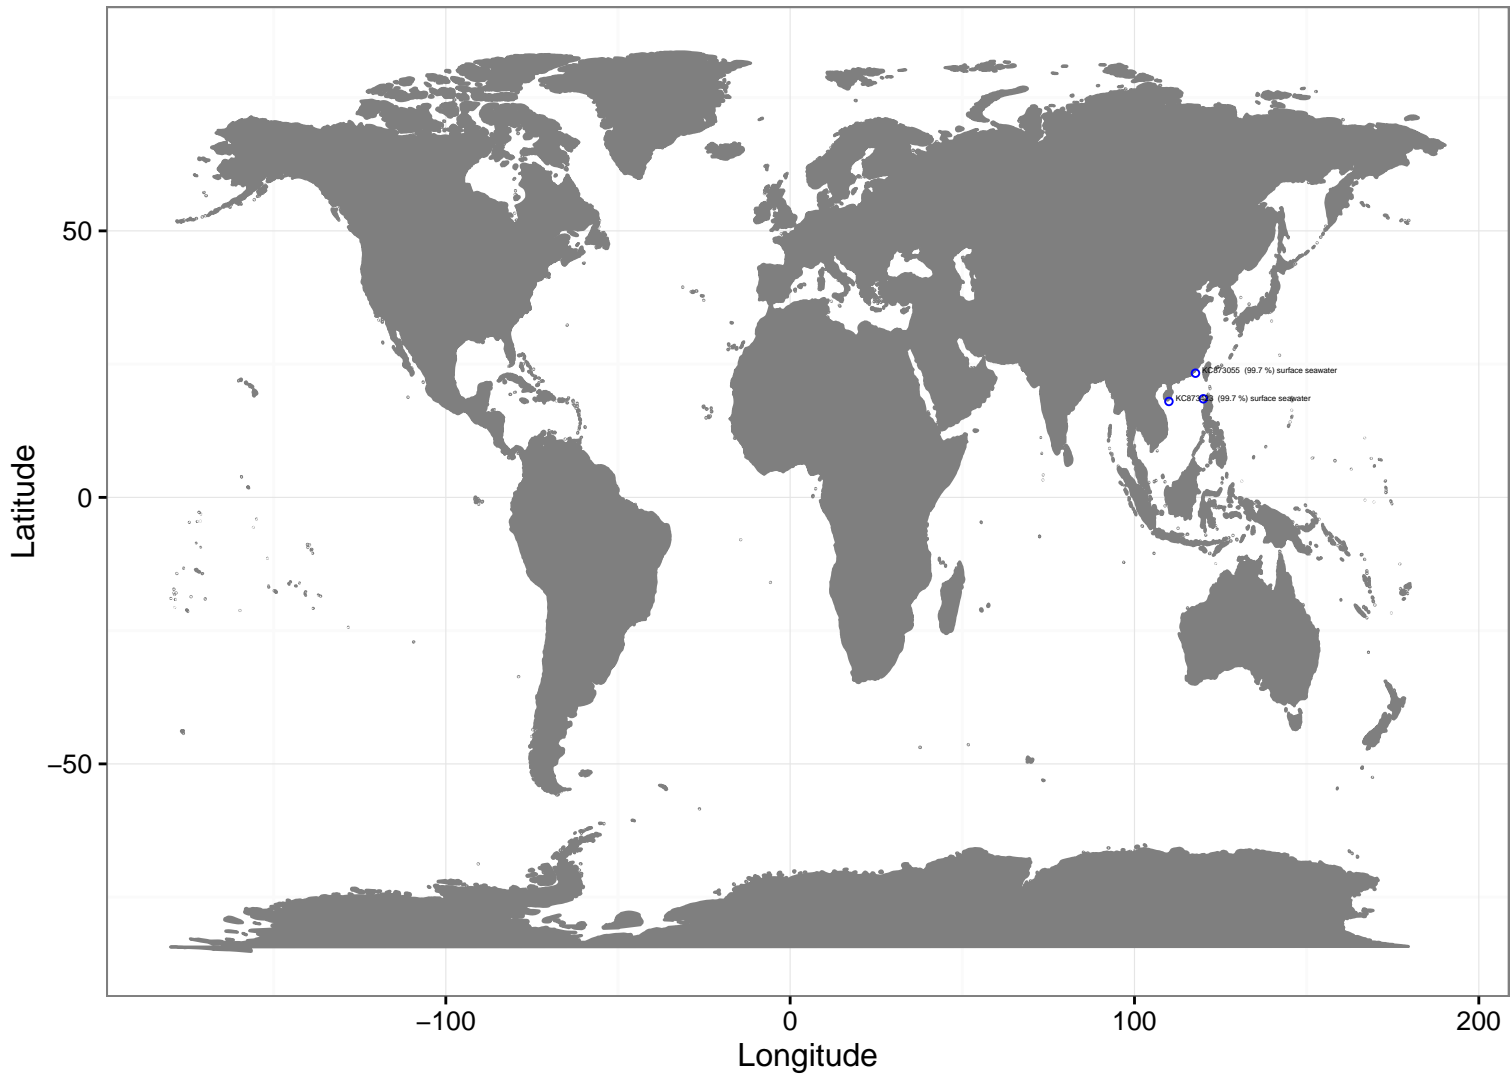

*Ahrensia kielensis* DSM 5890T (DB ID: t\_76 )

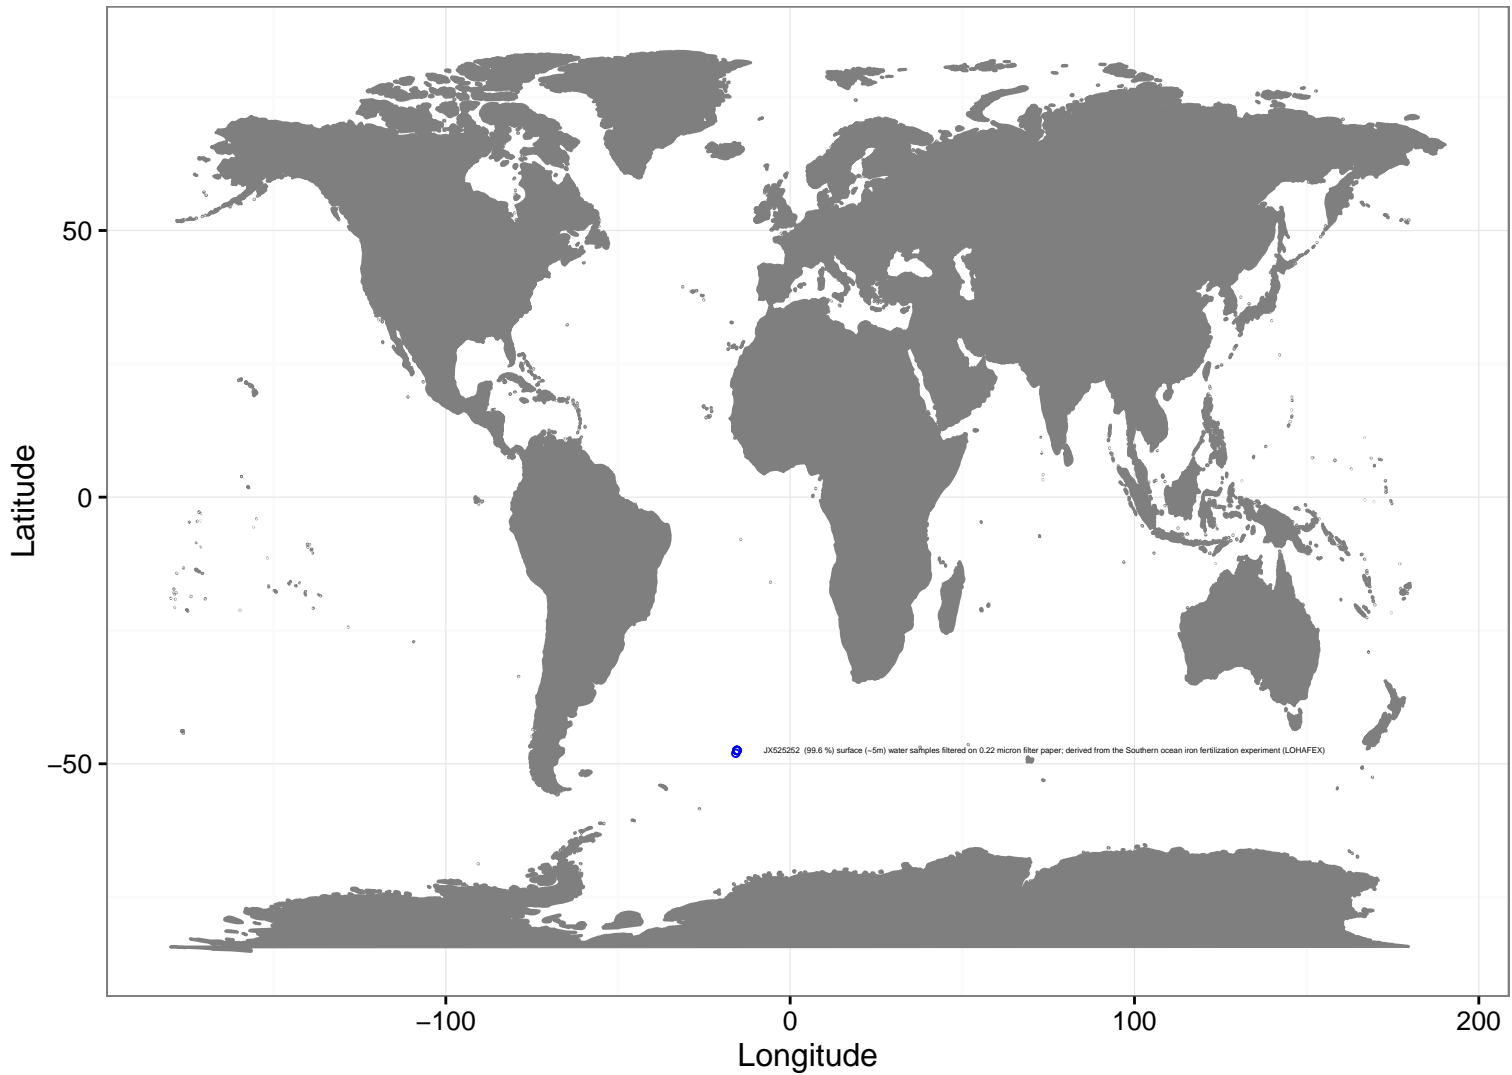

*Loktanella hongkongensis* DSM 17492T (DB ID: t\_81)

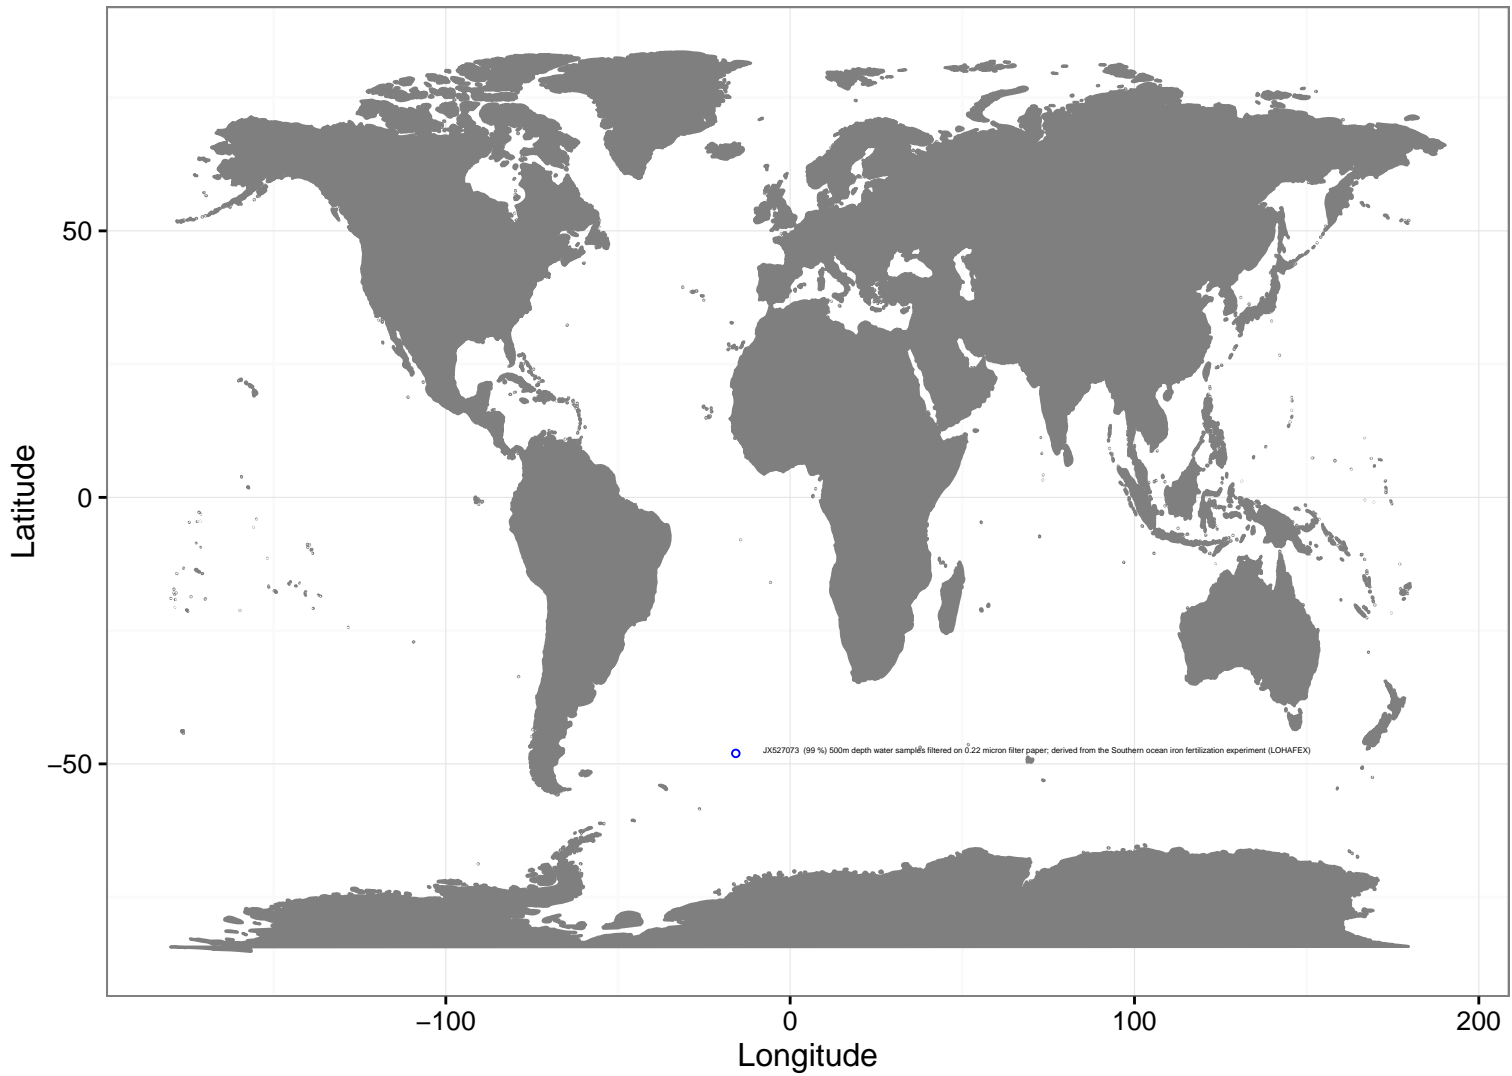

*Rhodobacter sphaeroides* WS8N (DB ID: t\_86 )

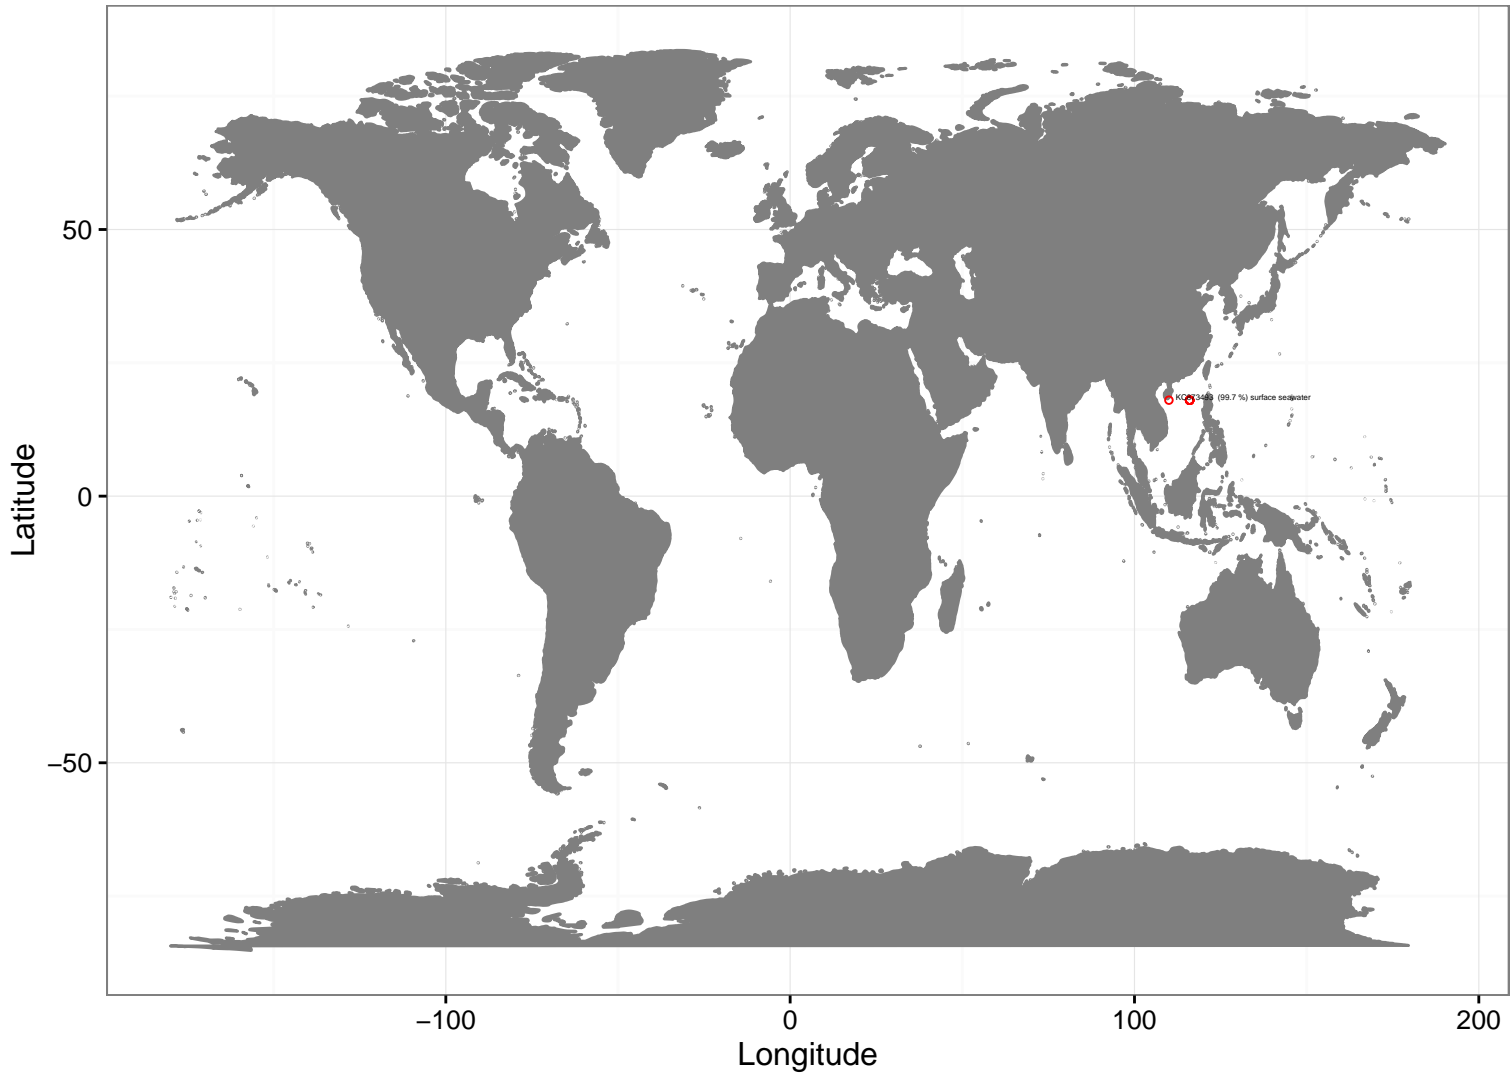

# *Rhodobacterales* bacterium HTCC2255 (DB ID: t\_87)

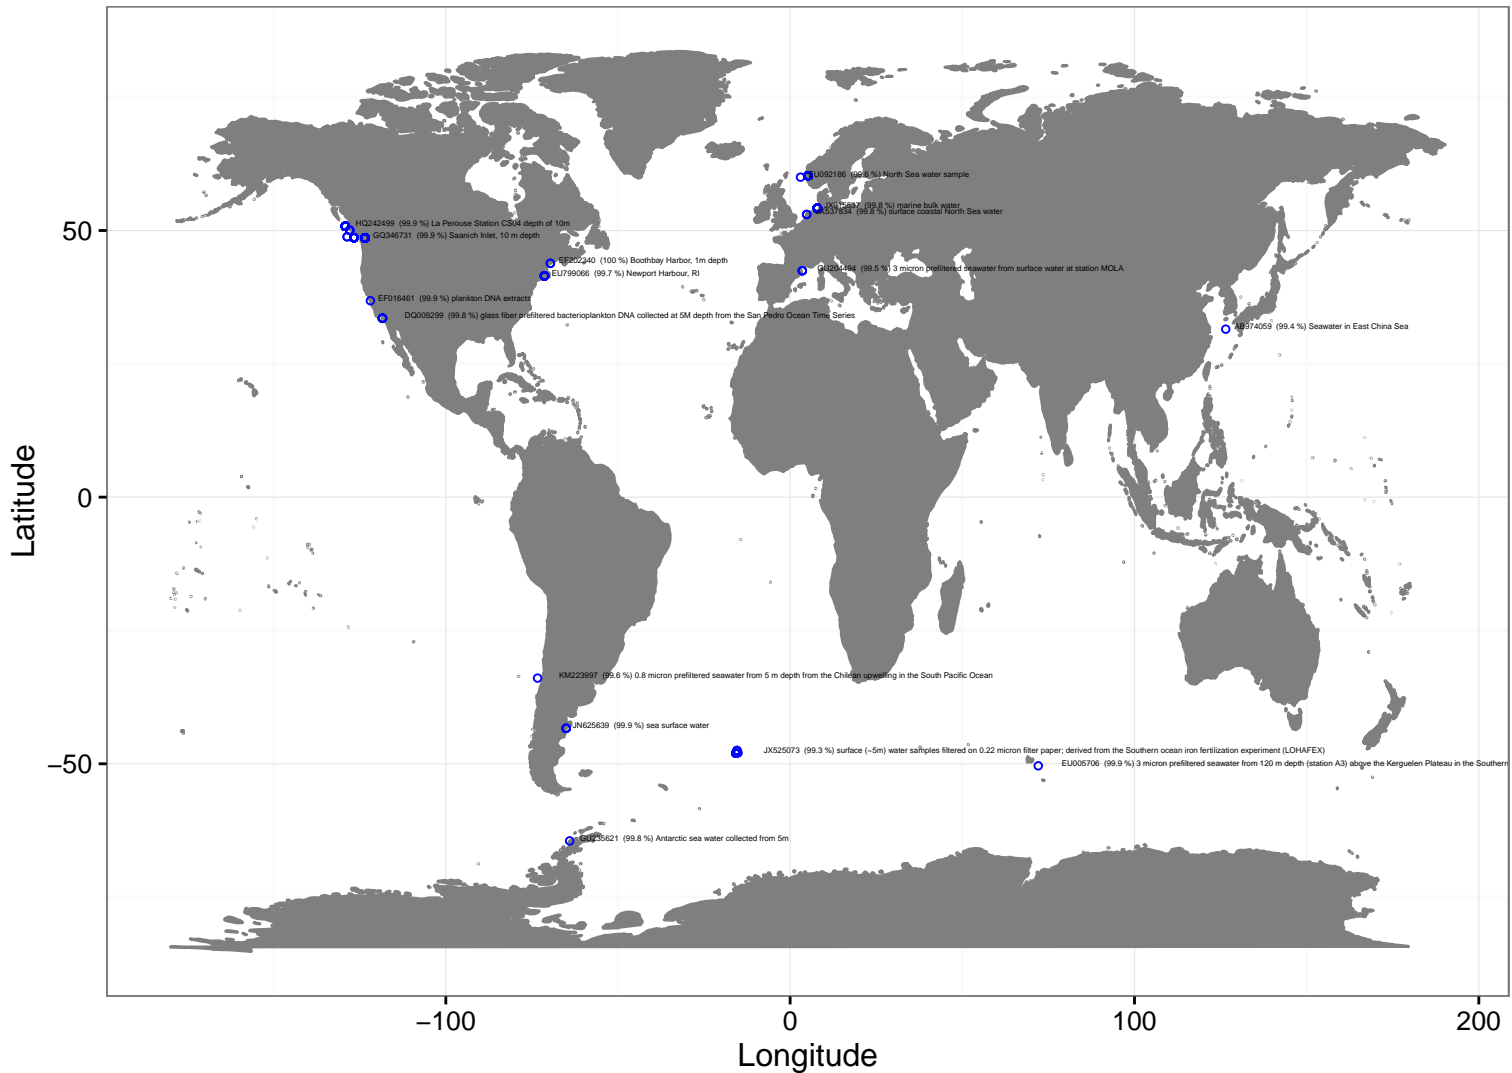

*Roseovarius nubinhibens* ISMT (DB ID: t\_89)

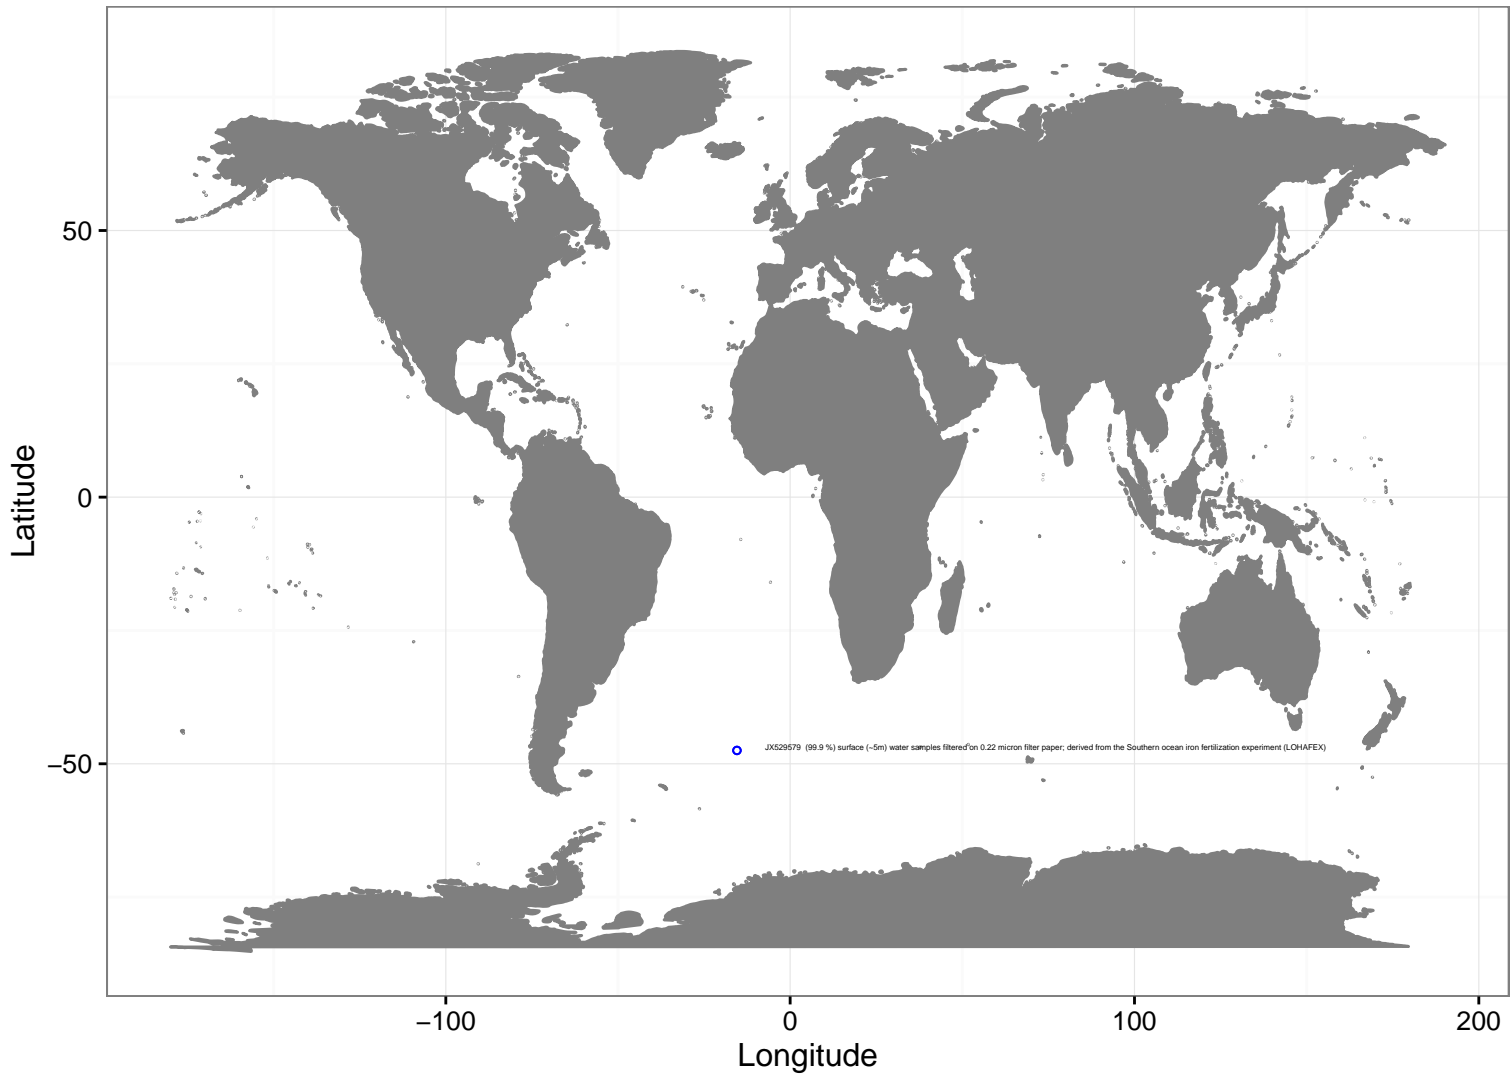



*Roseovarius* sp. 217 (DB ID: t\_90)

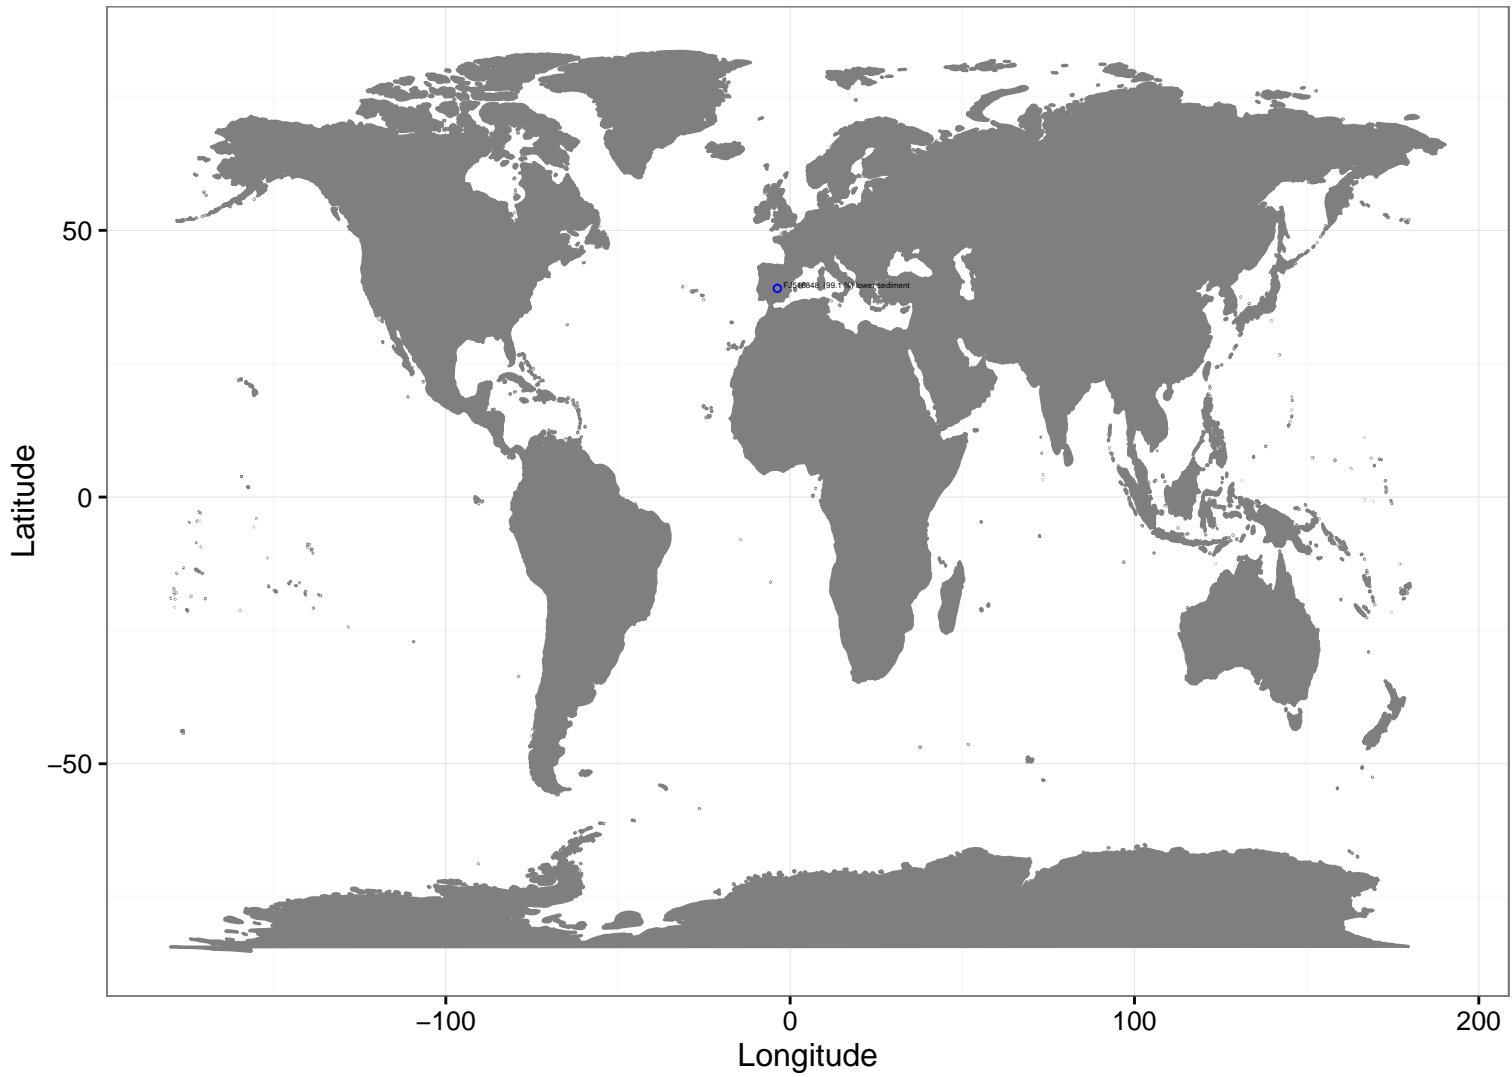

*Roseovarius mucosus* DSM 17069T (DB ID: t\_91 )

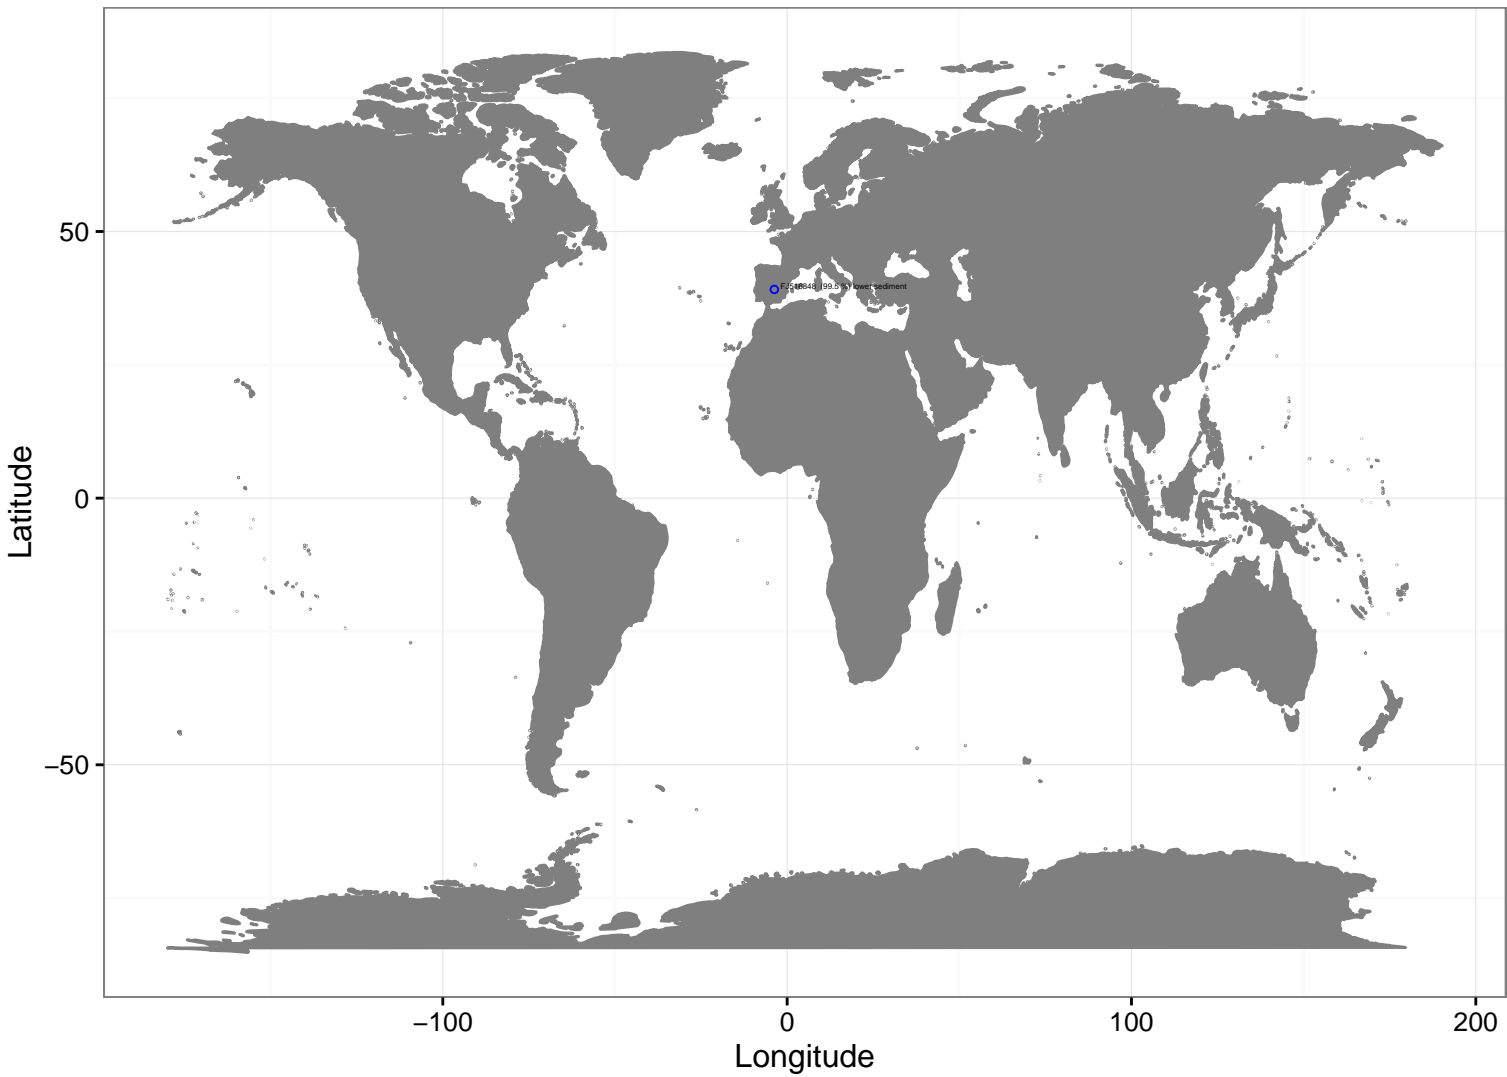

# *Sulfitobacter* sp. EE-36 (DB ID: t\_95)

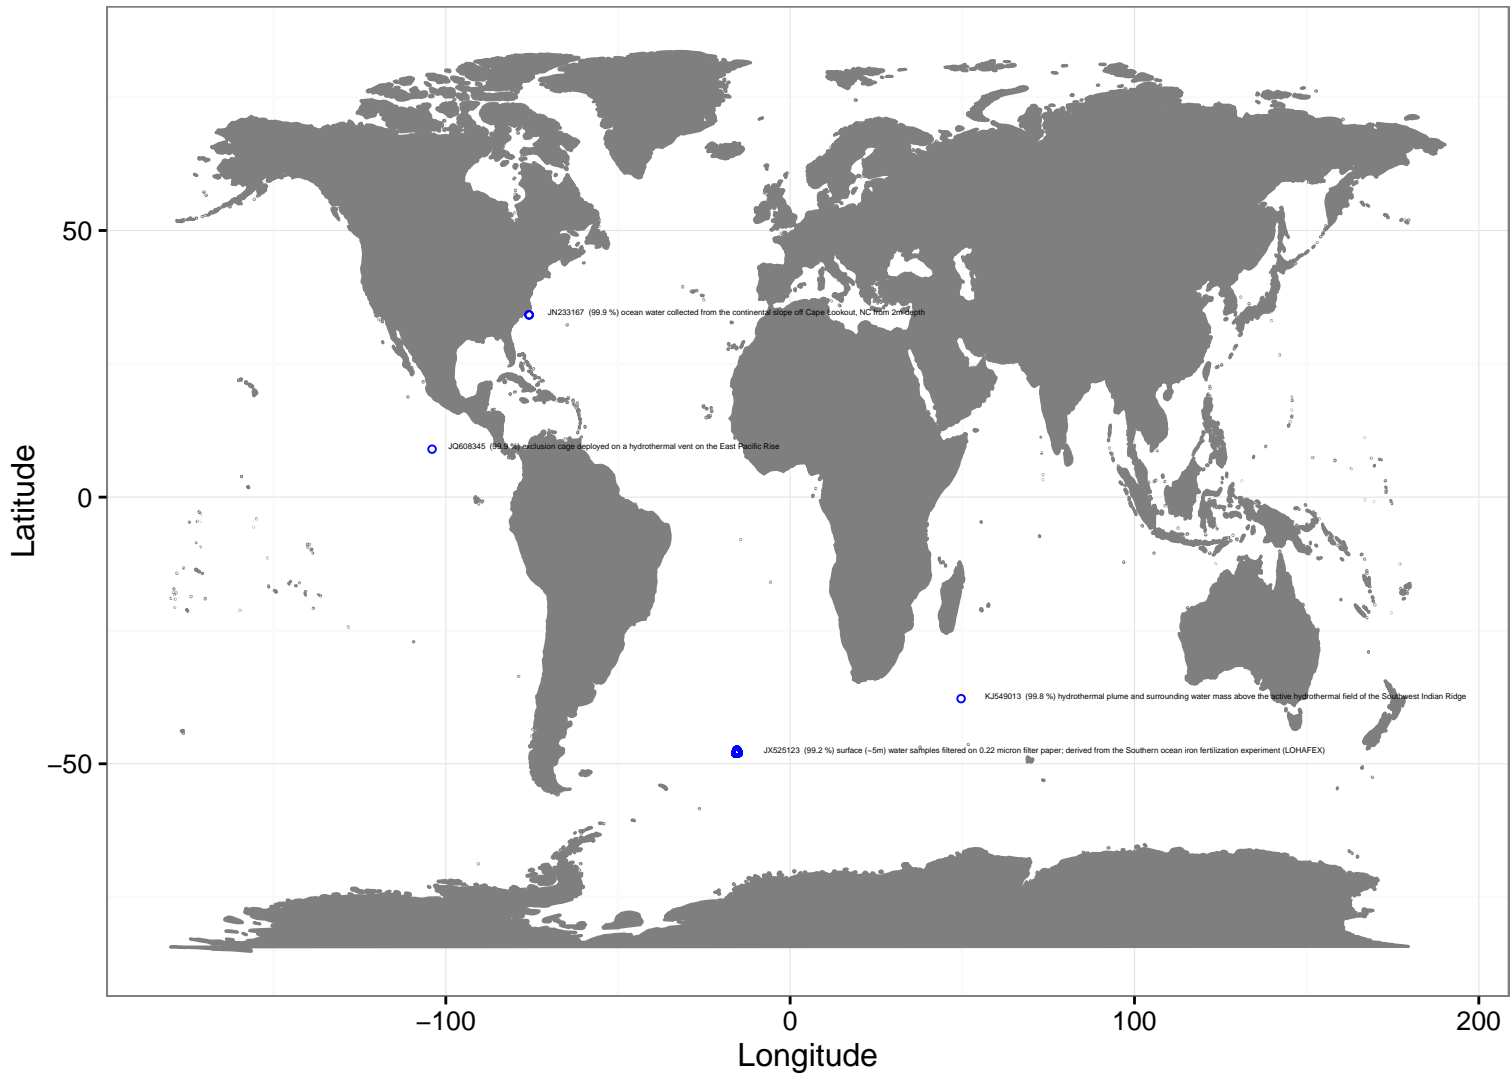

# *Sulfitobacter* sp. NAS-14.1 (DB ID: t\_96)

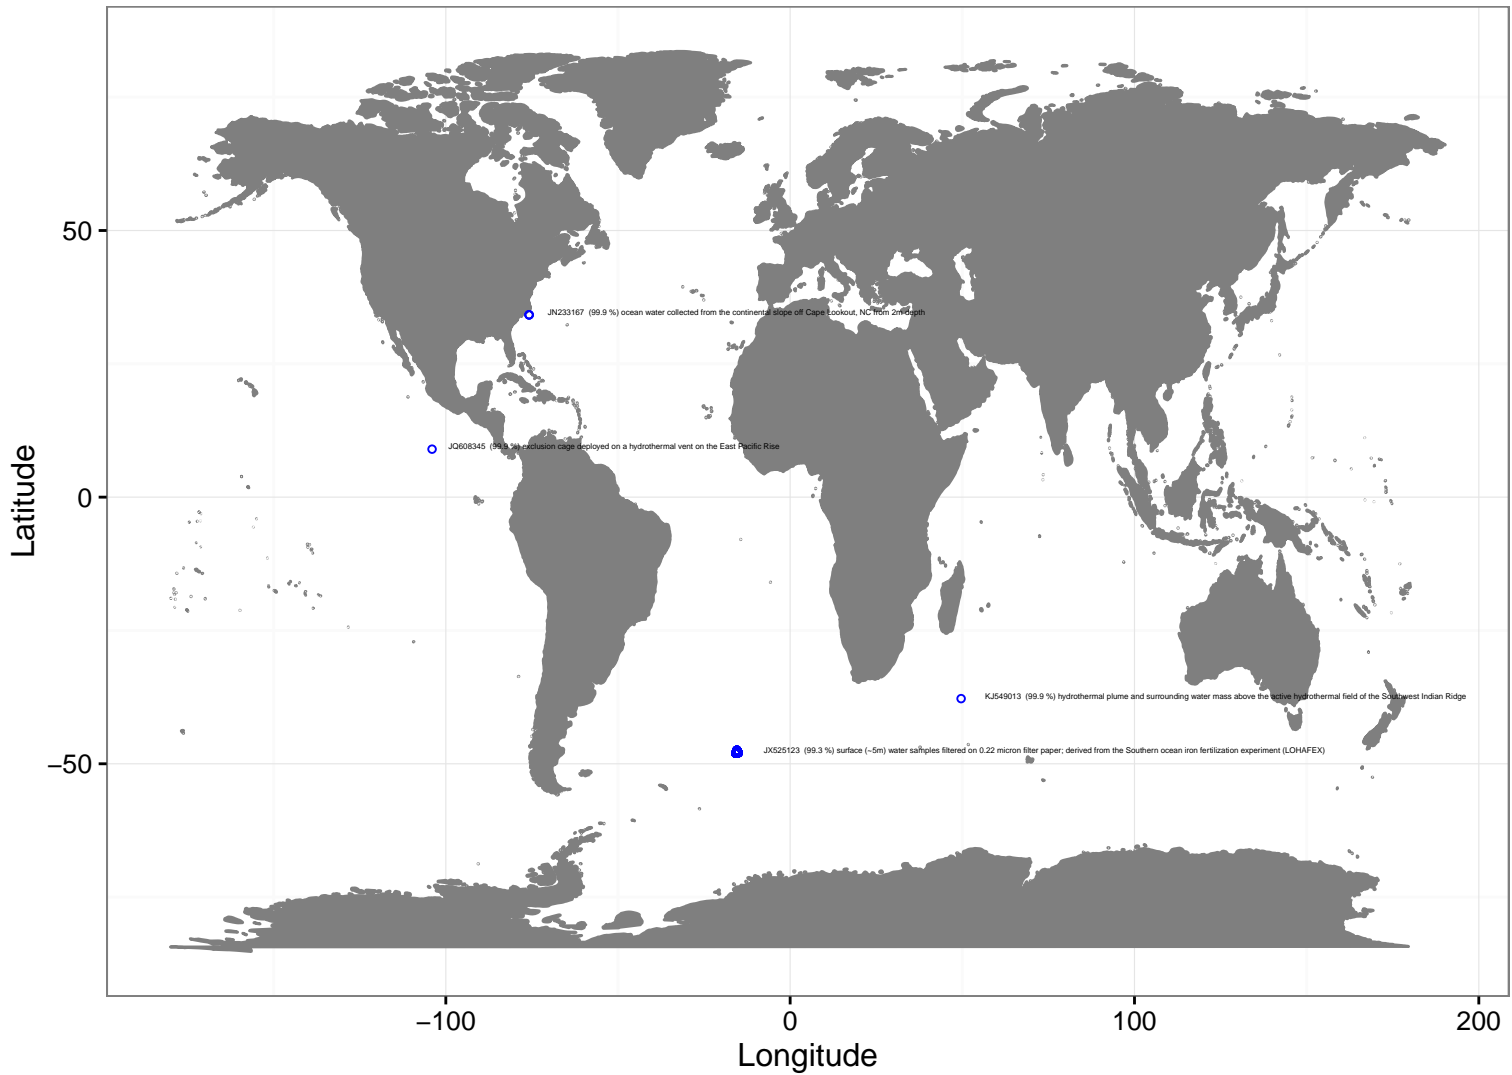

*Paracoccus* sp. J55 (DB ID: t\_99)

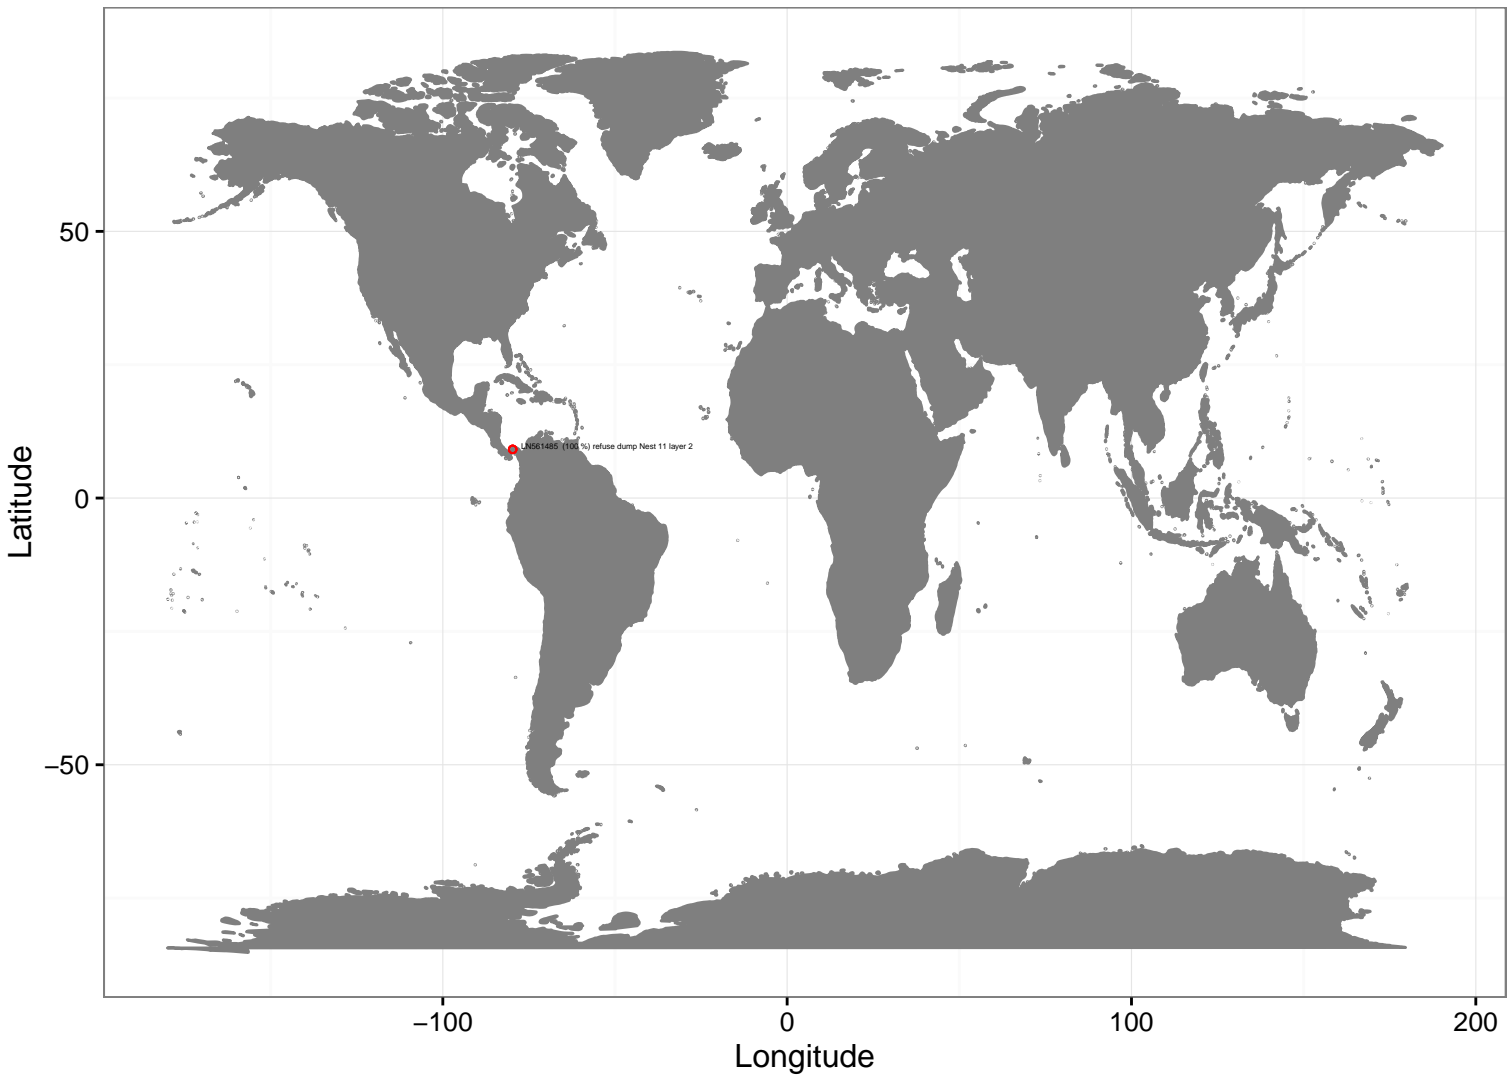

Supplement: ismej2016198x4.pdf [file ismej2016198x4.pdf]
